# Supplementary material for: An open-label cohort study of the improvement of quality of life and pain in de novo cervical dystonia patients after injections with 500 U botulinum toxin A (Dysport)
Source: PubMed Central journal article supplement — BMJ Open. 2013 Apr 26;3(4):e001853. doi: 10.1136/bmjopen-2012-001853 (PMC3641454; doi:10.1136/bmjopen-2012-001853), 2013-04-26

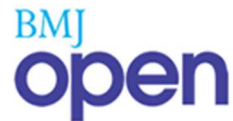

**An open-label cohort study of the improvement of quality of life and pain in de novo cervical dystonia patients after injections with 500 U botulinum toxin A (Dysport®)**

|                                 |                                                                                                                                                                                                                                                                                                                                                                         |
|---------------------------------|-------------------------------------------------------------------------------------------------------------------------------------------------------------------------------------------------------------------------------------------------------------------------------------------------------------------------------------------------------------------------|
| Journal:                        | <i>BMJ Open</i>                                                                                                                                                                                                                                                                                                                                                         |
| Manuscript ID:                  | bmjopen-2012-001853                                                                                                                                                                                                                                                                                                                                                     |
| Article Type:                   | Research                                                                                                                                                                                                                                                                                                                                                                |
| Date Submitted by the Author:   | 11-Sep-2012                                                                                                                                                                                                                                                                                                                                                             |
| Complete List of Authors:       | Hefter, Harald<br>Benecke, Rainer; University of Rostock, Department of Neurology<br>Erbguth, Frank; Klinikum Nürnberg, Department of Neurology<br>Jost, Wolfgang; Deutsche Klinik fuer Diagnostik, Neurology<br>Reichel, Gerhard; Deutsche Klinik für Diagnostik, Out-Patient Department of Neurology<br>Wissel, Joerg; Kliniken Beelitz GmbH, Department of Neurology |
| <b>Primary Subject Heading</b>: | Neurology                                                                                                                                                                                                                                                                                                                                                               |
| Secondary Subject Heading:      | Rehabilitation medicine                                                                                                                                                                                                                                                                                                                                                 |
| Keywords:                       | Neuromuscular disease < NEUROLOGY, Adult neurology < NEUROLOGY, REHABILITATION MEDICINE                                                                                                                                                                                                                                                                                 |
|                                 |                                                                                                                                                                                                                                                                                                                                                                         |

SCHOLARONE™  
Manuscripts

only

**Title:** An open-label cohort study of the improvement of quality of life and pain in *de novo* cervical dystonia patients after injections with 500 U botulinum toxin A (Dysport®)

**Authors:** Hefter H,<sup>1</sup> Benecke R,<sup>2</sup> Erbguth F,<sup>3</sup> Jost W,<sup>4</sup> Reichel G,<sup>5</sup> Wissel J<sup>6</sup>

**Affiliations:**

<sup>1</sup>Department of Neurology, University of Düsseldorf, Moorenstrasse 5, 40225 Düsseldorf, Germany

<sup>2</sup>Department of Neurology, University of Rostock, Gehlsheimer Str. 20, 18147 Rostock, Germany  
(reiner.benecke@med.uni-rostock.de)

<sup>3</sup>Department of Neurology, Klinikum Nürnberg, Breslauer Str. 201, 90471 Nürnberg, Germany  
(erbguth@klinikum-nuernberg.de)

<sup>4</sup>Department of Neurology, Deutsche Klinik für Diagnostik, Aukammallee 33, 65191 Wiesbaden, Germany  
(jost.neuro@dkd-wiesbaden.de)

<sup>5</sup>Out-Patient Department of Neurology, Paracelsus Klinik, Werdauer Strasse 68, 08060 Zwickau, Germany  
(prof.gerhard.reichel@pk-mx.de)

<sup>6</sup>Department of Neurology, Kliniken Beelitz GmbH, Paracelsusring 6a, 14547 Beelitz-Heilstätten, Germany  
(joerg@schwarz-wissel.de)

**Corresponding author:**

Harald Hefter

Department of Neurology

University of Düsseldorf

Moorenstrasse 5

40225 Düsseldorf

Germany

Tel: +49 211 81 17 025

Fax: +49 211 81 04 903

Email: [harald.hefter@online.de](mailto:harald.hefter@online.de)

“The Corresponding Author has the right to grant on behalf of all authors and does grant on behalf of all authors, an exclusive licence (or non-exclusive for government employees) on a worldwide basis to the BMJ Group and co-owners or contracting owning societies (where published by the BMJ Group on their behalf), and its Licensees to permit this article (if accepted) to be published in BMJ Open and any other BMJ Group products and to exploit all subsidiary rights, as set out in our licence.”

**Journal:** *BMJ Open*

1 **Word count (text)/limit:** 3812/4000

2

3 **Word count (abstract)/limit:** 291/300

4

5 **Tables/Figures:** 0/4 (limit 5)

6 **References/limit:** 11/40

7

8

9 **Short title:** Dysport for treatment of cervical dystonia

10

11

12 **Clinical trials information:** (NCT00447772; clinicaltrials.gov)

13

14

15 **Key words (limit of 5):** *de novo* cervical dystonia, quality of life, pain, Dysport, abobotulinumtoxinA

16

17

18

19

20

21

22

23

24

25

26

27

28

29

30

31

32

33

34

35

36

37

38

39

40

41

42

43

44

45

46

47

48

49

50

51

52

53

54

55

56

57

58

59

60

## Abstract

**Objectives:** It remains to be determined whether the benefits of botulinum toxin type A (BoNT-A) on cervical dystonia (CD) motor symptoms extend to improvements in patient quality of life (QoL). This analysis of a large, multicentre study was conducted with the aim of investigating changes in QoL and functioning among *de novo* patients receiving 500 U BoNT-A (abobotulinumtoxinA; Dysport®) for the treatment of the two most frequent forms of cervical dystonia (CD), predominantly torticollis and laterocollis.

**Design:** Prospective, open-label study of Dysport (500 U; Ipsen Biopharm Ltd) administered according to a defined intramuscular injection algorithm.

**Setting:** German and Austrian outpatient clinics.

**Participants:** 516 male and female patients (aged  $\geq 18$  years) with *de novo* CD. The majority of patients had torticollis (78.1%). Thirty-five patients had concomitant depression (MedDRA-defined).

**Main outcome measures:** Change from baseline to Week 4 and Week 12 in Craniocervical Dystonia Questionnaire (CDQ-24) total and subscale scores, patient diary items ('day-to-day capacities and activities', 'pain', and 'duration of pain'), and global assessment of pain.

**Results:** Significant improvements were observed in CDQ-24 total and subscale scores at Week 4 and were sustained up to Week 12 ( $p < 0.001$ ). Changes in CDQ-24 scores did not significantly differ between the torticollis and laterocollis groups or between patients with or without depression. There were also significant reductions in patient diary item scores for activities of daily living, pain and pain duration at Weeks 4 and 12 ( $p < 0.001$ ). Pain relief (less or no pain) was reported by 66.0% and 74.1% of patients at Week 4 and Week 12, respectively. Changes in pain parameters demonstrated a positive relationship with change in Tsui score.

**Conclusions:** Standardized open-label treatment with Dysport 500 U leads to improvements in QoL and pain intensity up to 12 weeks in patients with CD.

## Article summary

### Article focus:

- To test the hypothesis whether a modification of clinical symptoms is correlated to quality of life (QoL) parameters after treatment with botulinum toxin type A (BoNT-A)
- Investigation of the QoL and pain reduction benefits of Dysport when administered for the *de novo* management of torticollis and laterocollis in a large cervical dystonia (CD) patient population

### Key messages:

- Dysport 500 U significantly improves QoL, as rated by CDQ-24, in *de novo* patients with heterogeneous forms of CD
- Dysport 500 U treatment leads to significant reductions in pain (on several outcome measures) in *de novo* patients with heterogeneous forms of CD

### Strengths and limitations of this study:

- 1
  - 2
  - 3
  - 4
  - 5
  - 6
  - 7
  - 8
  - 9
  - 10
  - 11
  - 12
  - 13
  - 14
  - 15
  - 16
  - 17
  - 18
  - 19
  - 20
  - 21
  - 22
  - 23
  - 24
  - 25
  - 26
  - 27
  - 28
  - 29
  - 30
  - 31
  - 32
  - 33
  - 34
  - 35
  - 36
  - 37
  - 38
  - 39
  - 40
  - 41
  - 42
  - 43
  - 44
  - 45
  - 46
  - 47
  - 48
  - 49
  - 50
  - 51
  - 52
  - 53
  - 54
  - 55
  - 56
  - 57
  - 58
  - 59
  - 60
- This is the largest prospective, open-label cohort study of QoL in CD patients to date
  - This study reflects the short-term effects of Dysport arising from a single 500 U administration; therefore, long-term studies are required to determine whether the observed beneficial effects on symptoms and QoL can be sustained with repeated treatment.

For peer review only

## INTRODUCTION

Cervical dystonia (CD), the most frequent form of focal dystonia, may present as idiopathic or secondary disease.[1] Idiopathic CDs are characterised by abnormal, involuntary muscle contractions, resulting in abnormal head movements and various undesired positions of the head.[2] The disorder is commonly classified as a function of the direction of abnormal head position – torticollis (turning of the head), laterocollis (head tilt), retrocollis (neck extension), antecollis (flexion), or, most frequently, a combination of the above.[3] Increased involuntary activity in affected muscles frequently leads to hypertrophy, and resulting symptoms include pain in the region of the neck and shoulder, decreased range of motion, and impairment of voluntary movement of the head. Reduction of muscle activity with local botulinum toxin type A (BoNT-A) injections is recommended as the first-line treatment option for CD.[4] The efficacy and tolerability of abobotulinumtoxinA (Dysport®, Ipsen Biopharm Ltd.) and other BoNT-A preparations for the treatment of CD has been demonstrated in randomised, placebo-controlled trials and open-label extension studies, with symptom relief being sustained for up to 3 months or 4 treatment cycles, respectively.[4-8]

Clinical symptoms of CD (for example, neck pain) cause significant disability that interferes with patients' daily functioning, such as the ability to remain in employment.[9] Moreover, a significant negative impact on quality of life (QoL) is seen with CD and is comparable to that seen with other serious disabling illnesses, such as multiple sclerosis, Parkinson's disease and stroke.[10] In a study of 289 patients with CD from seven European countries, concomitant depression was identified as one of the two strongest predictors of poor QoL (alongside anxiety), in addition to response to botulinum toxin, self-deprecation, stigma, and other patient-related factors.[11] Successful treatment of motor symptoms by existing treatments does not necessarily entail a positive influence on patient QoL.[12] It is, therefore, important to analyse whether clinically effective treatment of the movement disorder also leads to improvements in social and emotional wellbeing for patients and a positive impact on their daily functions and activities.

A large, prospective, open, multicentre study was conducted to evaluate the effectiveness and safety of a single dose of Dysport (500 U) for the treatment of the two most frequent forms of CD.[13] Treatment was given according to a standardised algorithm based on the two most frequent forms of CD, predominantly torticollis and laterocollis. Evaluated over 12 weeks, CD symptom severity was assessed using an established scale (the Tsui scale), with the patient in a standardised seated position.[14] Results from the study showed that Dysport was effective and well tolerated for the *de novo* management of a range of heterogeneous forms of CD, when using a standardised regimen that allows tailored dosing based on individual symptom assessment.[13] QoL parameters were assessed as secondary objectives throughout the study using a patient disease questionnaire (Cranio-cervical Dystonia Questionnaire; CDQ-24)[15] and patient diaries.

1 Here, we present results of the QoL objectives, which aimed to determine the effects of treatment  
2 with Dysport 500 U on patient QoL, and everyday functions and activities. Pain may exert an  
3 influence on the patient's rating of the efficacy of BoNT-A therapy, which is not taken into account  
4 using the Tsui score. Consequently, pain was additionally evaluated using the above-mentioned  
5 measures.  
6  
7  
8  
9  
10  
11  
12  
13  
14  
15  
16  
17  
18  
19  
20  
21  
22  
23  
24  
25  
26  
27  
28  
29  
30  
31  
32  
33  
34  
35  
36  
37  
38  
39  
40  
41  
42  
43  
44  
45  
46  
47  
48  
49  
50  
51  
52  
53  
54  
55  
56  
57  
58  
59  
60

## METHODS

### Study design, patients and treatment

This was a prospective, multicentre, open-label study conducted in Germany and Austria to investigate the comparable effectiveness and safety of 500 U Dysport for the treatment of patients (aged  $\geq 18$  years) with heterogeneous forms of CD, naïve to BoNT-A. Full details of study design, and inclusion and exclusion criteria, have been published previously.[13]

All patients received a single intramuscular injection with 500 U Dysport, diluted in 2.5 mL 0.9% NaCl. Full details of the standardised injection protocol based on the symptoms assessed with the Tsui score have also been published previously.[13]

### Assessments

The severity of CD was assessed at Visit 1 (Week 0; baseline), Visit 2 (Week 4) and Visit 3 (Week 12) using the Tsui rating scale total score under standardised conditions, with the patient in a relaxed seated position. The primary efficacy outcome measure was the change from baseline to Week 4 in total Tsui score after treatment.[13]

### CDQ-24

The effects of treatment on QoL, pain and any restrictions of possible everyday functions and activities of the patient were assessed in comparison to baseline values using the validated CDQ-24.[15] The CDQ-24 is a disease-specific QoL instrument designed to investigate problems in daily living skills related to CD, and comprises 24 items within five domains related to stigma (questions 7, 8, 9, 10, 18, 22); emotional wellbeing (questions 11, 12, 13, 14, 15); pain (questions 4, 5, 21); activities of daily living (questions 1, 2, 3, 6, 19, 20); and social/family life (questions 16, 17, 23, 24). Scores for each item range from 0 to 4, representing increasing severity of impairment. In order to obtain scores for the individual subscales, the total score of each subscale (sum of the individual item scores) was transformed linearly to a 0 to 100 scale, where a score of 0 indicates the best and a score of 100 the worst possible QoL (which explains why some subscores, e.g. stigma, have higher values than the total score). Assessment of the CDQ-24 was conducted at baseline (Visit 1), Week 4 (Visit 2) and Week 12 (Visit 3).

### Patient diary

Patients were provided with a diary, which was used to self-record weekly ratings (on an 11-point visual analogue scale; VAS) for items related to 'Day-to-day capacities and activities' (0 = not affected, 10 = very severely affected), 'Pain' (0 = no pain, 10 = strongest imaginable pain) and 'Duration of pain' (0 = never pain, 10 = constant pain). Assessment of the patient diary was conducted at baseline (Visit 1), Week 4 (Visit 2) and Week 12 (Visit 3).



### *Global assessment of pain*

At Visits 2 and 3, patients were required to assess change of pain associated with CD according to the following response categories: 1 = no pain (anymore); 2 = less pain; 3 = no change; 4 = more pain.

### **Statistical analyses**

All efficacy and QoL assessments were conducted in the intent-to-treat (ITT) population (i.e. all patients of the safety population with a baseline [Visit 1, Week 0] and a post-baseline [Visit 2, Week 4 or Visit 3, Week 12] assessment of the Tsui rating scale).

Time course was analysed over Visits 1, 2 and 3 or Week 0, 4, 12, respectively, of CDQ-24 subscale 'pain', diary item 'pain', global assessment of pain (at Visits 2 and 3) and CDQ-24 total score for patients with valid data for all three pain assessments at all visits.

Inferential analyses of CDQ-24 total score and subscale changes from baseline at Visits 2 and 3 were conducted for the total population and by main type of CD. Descriptive and inferential analyses of diary item changes from baseline at Weeks 4 and 12 were performed for the total population and by main type of CD. Descriptive analyses of standardized pain measures (global assessment of pain by patient at Visits 2 and 3; CDQ-24 'pain' change from baseline at Visits 2 and 3; diary items 'pain' and 'pain duration' changes from baseline at Weeks 4 and 12) were assessed by main type of CD. All pain statements were documented differently; in order to allow comparisons between the different assessments, all pain measures were converted to a common scale using the following categories for change from baseline: *less or no pain; no change; or more pain*.

Pearson correlation analyses were performed of total Tsui score change from baseline at Visit 2 and diary items 'pain' and 'pain duration' changes from baseline at Week 4, and CDQ-24 subscale 'pain' change from baseline at Week 4. In addition, Pearson correlation analyses were performed between CDQ-24 total score and subscale score changes from baseline and changes from baseline for items of the patient diary.

Additional *post-hoc* analyses were carried out to investigate the impact of concomitant depression on treatment effectiveness and QoL.

## RESULTS

### Patient disposition and demographics

Of the 516 patients enrolled in the study, safety data were available for all but one patient (safety population: n=515). No baseline and/or post-baseline assessments of the Tsui rating scale were available for 12 patients; thus, the ITT population comprised 503 patients. Overall, 26 patients discontinued the study prematurely, with the main reasons cited as insufficient compliance and lost to follow-up.

The majority of patients had torticollis (n=402; 78.1%; 112 patients [21.7%] had laterocollis; type of CD was unknown in one patient). Baseline characteristics were generally similar between patients with torticollis and laterocollis.[13] The proportion of patients with tremor was similar in both torticollis (36.1%) and laterocollis (36.6%) groups. However, approximately half of the laterocollis patients (47.3%) were affected by shoulder elevation compared with only one-third of torticollis patients (31.3%). The majority of patients in the total population (56.5%) were affected by pain (torticollis: 54.5%; laterocollis: 64.3%).

Mean CDQ-24 total score at baseline for the overall patient population was 39.6 ( $\pm$ 18.8 [39.8 for ITT population]). Baseline mean CDQ-24 total scores did not differ markedly between the main CD types: torticollis (39.9) and laterocollis (38.8).

After analysis of the study data, 35 patients were identified with depression as concomitant disease, according to the preferred MedDRA term (6.8% of the total population). The Tsui score at baseline was comparable between patients with (n=34) and without (n=469) depression (8.6 and 8.4, respectively), as well as the decrease in Tsui score at Week 4 minus baseline ( $-4.0$  and  $-3.8$ , respectively).

### Treatments and dosing

All treated patients received Dysport 500 U at baseline, with the exception of three patients who received 360, 400 and 460 U. The most frequently reported concomitant medications (>10% of patients) by therapeutic class were beta-blocking agents (19.0%), agents acting on the renin-angiotensin system (14.4%), psychoanaleptics (13.6%), thyroid therapy (13.0%) and analgesics (10.1%). Use of concomitant medication was similar across CD subtypes.

### CDQ-24

In the total patient population, treatment with Dysport was associated with a statistically significant improvement in the CDQ-24 total score from baseline at Week 4 (decrease of 11.1 points [95% confidence interval (CI)  $-12.5$ ,  $-9.6$ ]; mean score: 28.7), which was maintained up to Week 12 (decrease of 11.8 points [95% CI  $-13.1$ ,  $-10.4$ ]; mean score: 28.0) (Figure 1,  $p < 0.001$  at Week 4 and Week 12 vs. baseline).

1  
2  
3 At Week 4 and Week 12, Dysport treatment significantly improved all CDQ-24 subscale scores  
4 from baseline (Figure 1,  $p < 0.001$ ). Patient-rated QoL at baseline was highest (worst) for subscale  
5 'stigma' (mean score: 50.4) and lowest (best) for social/family life (mean score: 21.9). Accordingly,  
6 mean changes from baseline (at Week 4 and Week 12) were highest for subscale 'stigma' ( $-16.8$   
7 [95% CI  $-19.0, -14.7$ ] and  $-16.4$  [95% CI  $-18.4, -14.3$ ], respectively) and lowest for subscale  
8 'social/family life' ( $-5.6$  [95% CI  $-7.2, -4.0$ ] and  $-6.7$  [95% CI  $-8.3, -5.1$ ], respectively). For all  
9 subscales, except 'stigma', continued improvement was seen from Week 4 through to Week 12.  
10  
11  
12  
13

14  
15 There were no statistically significant differences in QoL results between the torticollis and  
16 laterocollis groups (for total score and subscores).  
17  
18  
19

20 Higher CDQ-24 total scores were recorded for the subgroup of patients with depression, with mean  
21 scores at Visit 1 (baseline), Visit 2 and Visit 3 of 51.8, 41.7 and 38.5, respectively, compared with  
22 38.9, 27.8 and 27.2, respectively, for those without depression. However, the changes in CDQ-24  
23 total score from baseline to Week 4 and Week 12 were comparable between patients with and  
24 without depression. The difference between patients with and without depression was most  
25 apparent for the CDQ-24 subscale 'emotional wellbeing' at Visit 1, 2, and 3: mean scores of 57.5,  
26 47.4 and 43.8, respectively, for patients with depression, and 38.0, 27.7 and 26.7, respectively, for  
27 those without depression. No differences were observed for CDQ-24 total scores between the  
28 torticollis and laterocollis groups of patients with depression. However, a noticeably smaller change  
29 from baseline to Visit 2 was seen in the depressed laterocollis subgroup for 'emotional wellbeing'  
30 ( $-4.5$ ) when compared with the depressed torticollis subgroup ( $-12.5$ ).  
31  
32  
33  
34  
35  
36  
37

### 38 Patient diary

39 Similar to the results for CDQ-24, patients' diaries reflected positive treatment effects of Dysport on  
40 the VAS-assessed activities of daily living, pain and pain duration (mean  $\pm$  standard deviation  
41 [ $\pm$ SD] baseline values  $5.3 \pm 2.8$ ,  $4.1 \pm 3.0$  and  $4.7 \pm 3.4$  points, respectively). As shown in Figure 2,  
42 for the total population, 'Pain', 'Pain duration' and 'Day-to-day functions and activities' significantly  
43 improved at Week 4 and Week 12 versus baseline ( $p < 0.001$ ). For 'Pain' and 'Pain duration', there  
44 was further mild improvement from Week 4 to Week 12.  
45  
46  
47  
48  
49

50 Descriptive and t-test statistical analyses of diary item changes of the CD subgroups (torticollis and  
51 laterocollis) from baseline to Week 4 and Week 12 showed that all changes were statistically  
52 significant ( $p < 0.05$ ), with the exception of change of 'Day-to-day functions and activities' of  
53 laterocollis patients between baseline and Week 12 ( $p = 0.0531$ ). There were no other statistically  
54 significant differences in patient diary results in the torticollis and laterocollis subgroups.  
55  
56  
57  
58  
59  
60

## Global assessment of pain

Most patients judged pain relief higher at Week 12 than at Week 4. Pain relief (less or no pain) was perceived by 330 patients (66.0%) at Week 4 and by 363 patients (74.1%) at Week 12 (no change: 16.4% at Week 4 and 16.9% at Week 12; more pain: 17.6% at Week 4 and 9.0% at Week 12).

## Results of correlation analyses

### *CDQ-24 and Tsui score*

Total CDQ-24 and all CDQ-24 subscores correlated significantly at baseline with Tsui score ( $p<0.001$ ), with a correlation coefficient (R) varying between 0.17 and 0.27. Comparing the time course of Tsui score and QoL, the positive trend of the CDQ-24 total score at Week 4 (24% improvement) continued up to Week 12 (27.5% improvement), although the Tsui total score deteriorated between Week 4 (44.3% improvement) and Week 12 (24.3% improvement) in all patients (Figure 3). Nevertheless, statistically significant correlations ( $p<0.001$ ) were seen between changes from baseline to Visits 2 (Figure 4) and 3 in total CDQ-24 score and in Tsui total score, but the correlation at Week 4 was slightly higher ( $R=0.26$ ) than at Week 12 ( $R=0.24$ ). Correlations ( $R<0.3$ ) were also seen between changes from baseline to Visits 2 and 3 in individual CDQ-24 subscale scores and in Tsui total score, which were statistically significant ( $p<0.001$ ) for 'stigma', 'emotional wellbeing', 'pain' and 'activities of daily living'. For social/family life, the correlation was significant at Week 4 ( $p<0.01$ ) but not at Week 12 ( $p=0.054$ ).

### *Pain and Tsui score*

A positive relationship was also evident between the global pain assessment and the Tsui score for the total population: patients with an assessment of 'less pain' had a decrease in mean Tsui score at Week 4 ( $-4.5$ ), as did patients with 'no change in pain' ( $-3.0$ ) and patients with 'more pain' ( $-3.2$ ). A high decrease in mean Tsui score (Visit 2 vs baseline:  $-4.9$ ) was achieved by patients in the laterocollis group.

### *Global assessment of pain, CDQ-24 subscale pain and patient diary pain*

Overall, a significant positive relationship ( $p<0.001$ ) was seen between all pain parameters (i.e. CDQ-24, patient diary and global assessment of pain), with the CDQ subscale pain and the diary item of 'pain duration' showing the lowest correlation ( $R=0.36$ ). The correlation between patient global assessment of pain and the pain intensity in the patient diary resulted in a much higher correlation coefficient ( $R=0.46$ ).

The percentage of patients reporting a global improvement of pain at Week 4 (66.0%) was higher than the percentage of patients documenting a pain improvement in their diaries (50.2–52.3%). At Week 12, the discrepancy was even higher between global improvement of pain (74.1%) and the

1 percentage of patients documenting pain improvement in their diaries at this time point (48.3–  
2 55.2%).  
3  
4

5 *CDQ-24 activities of daily living and patient diary daily activities*

6  
7 Comparing all CDQ subscales with the patient diary, the highest correlations in the total population  
8 (and for both CD types) were observed between the patient diary item of 'Day-to-day function' and  
9 the CDQ-24 subscale of 'Activities of daily living' and 'Stigma', with R=0.48 and 0.37 (for total  
10 population), respectively, at Week 4, and R=0.43 and 0.38 (for total population), respectively, at  
11 Week 12 (p<0.001).  
12  
13  
14  
15  
16  
17  
18  
19  
20  
21  
22  
23  
24  
25  
26  
27  
28  
29  
30  
31  
32  
33  
34  
35  
36  
37  
38  
39  
40  
41  
42  
43  
44  
45  
46  
47  
48  
49  
50  
51  
52  
53  
54  
55  
56  
57  
58  
59  
60

## DISCUSSION

The results from this study, the largest published, prospective, open-label cohort study of *de novo* patients with CD to date, demonstrate that a single dose of 500 U Dysport leads to an improvement in disease-related impairment of QoL, as assessed by CDQ-24. Notably, the CDQ-24 results in Week 12 were better than those recorded in Week 4, despite an increase (worsening) of Tsui score (Figure 3), suggesting that improvements in QoL are maintained for a clinically significant duration. Our findings imply that the positive effects of BONT-A following treatment are encouraging to patients and helps them to gain perspective on their condition. Improvement of QoL seems to be better at Week 12, just before the second injection, compared to Week 4 when the injection has its maximal effect. This underscores the involvement of additional factors beyond abnormal head posture in influencing QoL in CD. We believe that patients appreciate improvements in their condition relative to baseline and that severity of CD can systematically be reduced by repetitive injections every 3 months. This perspective potentially accounts for better scores at Week 12 compared to Week 4. Additionally, greater improvement at Week 12 compared with Week 4 may reflect the ability of the CDQ-24 to capture longer-term changes in QoL.[15]

Improvement of QoL items linked to abnormal head posture, such as stigma, did however follow the temporal course of head position, with worse scores at Week 12 than at Week 4. This is in contrast to the other subscales of the CDQ-24. Overall, stigma appears to be among the most important QoL-related factors, with this parameter being associated with the worst baseline CDQ-24 subscale score for all patients. The appearance of patients can be seriously affected by involuntary movements seen in CD and self-perceived stigma can be a major source of disability.[11, 16] Indeed, results from the present study show that stigma is seemingly important for the everyday function of patients, with a positive correlation being observed between the CDQ-24 subscale 'Stigma' and the diary item of 'Day-to-day functions and activities'.

Pain is another important factor influencing QoL. Interestingly, better improvements in pain were recorded when the clinician was present for the assessment (global assessment of pain) than rated by the patients using their diaries at home. Regardless, systematic improvement of pain, not only of pain intensity but also of pain duration, were reported by all assessments. In general, an improvement of Tsui score correlated positively with an improvement of pain in this study, with patients recording less pain on the global pain assessment achieving the greatest reduction in Tsui total score.

In this study, patients with depression as concomitant disease showed worse QoL scores at baseline. Importantly, following Dysport treatment, patients with depression experienced similar benefits to those without depression, as demonstrated by similar changes from baseline at Week 4

1 and Week 12 for the Tsui score, and for QoL between the depressed and non-depressed  
2 subgroups. The ability of BONT-A treatment to improve QoL in the presence of concomitant  
3 depression is particularly pertinent in view of published observations highlighting the role of  
4 depression as a key determinant of poor QoL in patients with CD.[11]  
5  
6  
7

8  
9 Although laterocollis patients responded well according to Tsui score, pain appeared to be more  
10 common in this patient group than in patients with torticollis. The higher proportion of shoulder  
11 elevation in laterocollis patients may be one possible explanation for the increased rate of  
12 documented pain in these patients. As presented previously,[13] improvements in CD symptoms  
13 were confirmed by investigator and patient global assessment of symptoms without distinct  
14 (significant) group differences, although laterocollis patients experienced more frequent severe  
15 muscle weakness as an adverse event than torticollis patients (8.9% laterocollis, n=10 vs. 1.7%  
16 torticollis, n=7). Investigator and patient ratings of tolerability also varied most in the laterocollis  
17 group at Week 4, which could probably be explained by the higher rate of severe muscular  
18 weakness reported in these patients.[13] Although torticollis and laterocollis patients showed the  
19 same clinical response in the Tsui score, there are obviously differences between the two groups  
20 in disease perception. More analyses of the available study data including side effects, such as  
21 muscular weakness, may help to understand these apparent inconsistencies. Moreover, further  
22 studies may clarify if this was a random effect or if these patients would benefit from longer  
23 treatment duration with Dysport. Finally, the specific head position, i.e. whether the head is tilted or  
24 rotated, does not seem to play an essential role in emotional and social wellbeing; patients with  
25 either torticollis or laterocollis demonstrated comparable results in the CDQ-24 subscale 'emotional  
26 wellbeing' at baseline.  
27  
28  
29  
30  
31  
32  
33  
34  
35  
36  
37

38 The results from this study support those from a published study by Ben-Shlomo *et al.*, which  
39 demonstrated that, in addition to disease severity, QoL in patients with CD is predominantly  
40 determined by factors such as self-esteem, self-deprecation, stigma and depression.[11]  
41 Consequently, the care of these patients should not only focus on the reduction of CD symptom  
42 severity, but also on the improvement of the patient's psychological wellbeing. The use of  
43 pharmacological treatments with the ability to reduce disease severity has been shown to have a  
44 major benefit on both the physical and mental wellbeing of CD patients.[11] Recent controlled  
45 studies, for example,[17] have shown that short-term treatment with a combination of  
46 pharmacological therapy (BoNT-A) and a physical treatment programme (comprising self-control  
47 techniques and counselling) may be more effective than a sole pharmacological intervention.  
48 Therefore, further studies investigating the long-term effects of pure pharmacological and  
49 multidimensional treatment programmes on QoL are warranted.  
50  
51  
52  
53  
54  
55  
56  
57  
58  
59  
60

1 In conclusion, CD is a disabling and often painful illness that interferes with activities of daily living.  
2  
3 As a result, CD has a significant adverse impact on patient's physical and mental wellbeing and  
4  
5 QoL. Results from this large, prospective, open-label study support the ability of Dysport 500 U to  
6  
7 provide sustained efficacy in reducing motor symptoms coincident with significant improvements in  
8  
9 pain and QoL among patients with CD, and provide the foundation for further investigation in  
10  
11 randomised, controlled studies.

### 12 **Acknowledgements**

13  
14 This study was supported by Ipsen Pharma GmbH, Germany. Data management and statistical  
15  
16 analyses were performed by GKM Gesellschaft für Therapieforschung in Munich, Germany.  
17  
18 Editorial assistance for the preparation of this manuscript was provided by Ogilvy Healthworld  
19  
20 Medical Education; funding was provided by Ipsen Pharma GmbH. The authors would like to thank  
21  
22 Christiane Colling, PhD, Medical Project Manager, Ipsen Pharma GmbH, for her assistance in the  
23  
24 conduct of the study and for review of the manuscript.

### 25 **Competing interests [this article]**

26 No competing interests. HH was the coordinating investigator of this study.  
27  
28

### 29 **Competing interests (previous 12 months)**

30 All authors are consultants for Ipsen.  
31  
32

### 33 **Funding**

34 Funding was provided by Ipsen Pharma GmbH.  
35  
36  
37

### 38 **Author contributions:**

39 All authors were involved in the concept and study design, study conduct, data collection, analysis  
40  
41 and interpretation, manuscript writing, review and critique. All authors approved the final  
42  
43 manuscript.  
44  
45

### 46 **Data sharing statement:**

47 There is no additional data available.  
48  
49  
50  
51  
52  
53  
54  
55  
56  
57  
58  
59  
60



**Figure 1:** Change in CDQ-24 total and subscale scores from baseline to Weeks 4 and 12 (ITT: total population)

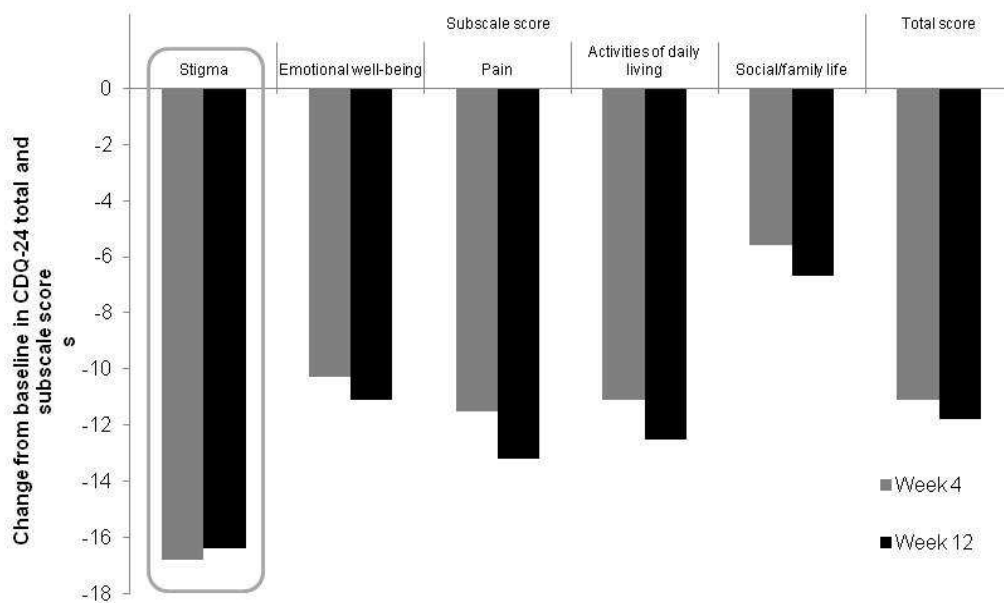

Total score and all subscores differed significantly from baseline to Week 4 and Week 12 ( $p < 0.001$  at Week 4 and Week 12 vs. baseline). ITT, intent-to-treat.

Review only

1  
2  
3  
4  
5  
6  
7  
8  
9  
10  
11  
12  
13  
14  
15  
16  
17  
18  
19  
20  
21  
22  
23  
24  
25  
26  
27  
28  
29  
30  
31  
32  
33  
34  
35  
36  
37  
38  
39  
40  
41  
42  
43  
44  
45  
46  
47  
48  
49  
50  
51  
52  
53  
54  
55  
56  
57  
58  
59  
60

**Figure 2:** Change in patient diary visual analogue score (VAS) from baseline to Weeks 4 and 12 (ITT: total population)

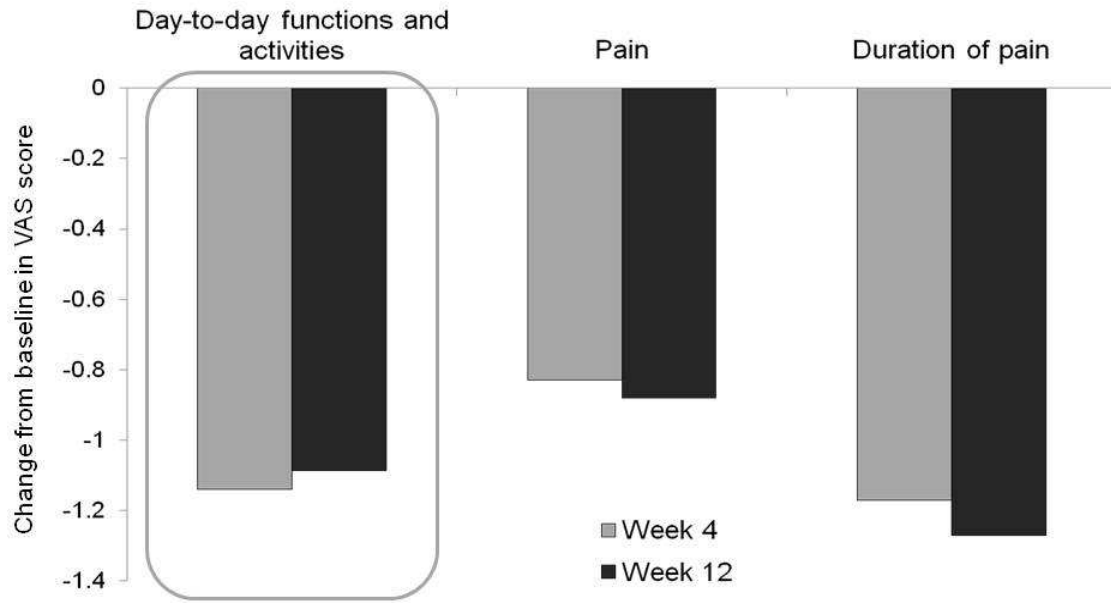

t-test analysis:  $p < 0.001$  at Week 4 and Week 12 vs. baseline.  
ITT, intent-to-treat.

**Figure 3:** Time course of change in total Tsui score and total CDQ24 score

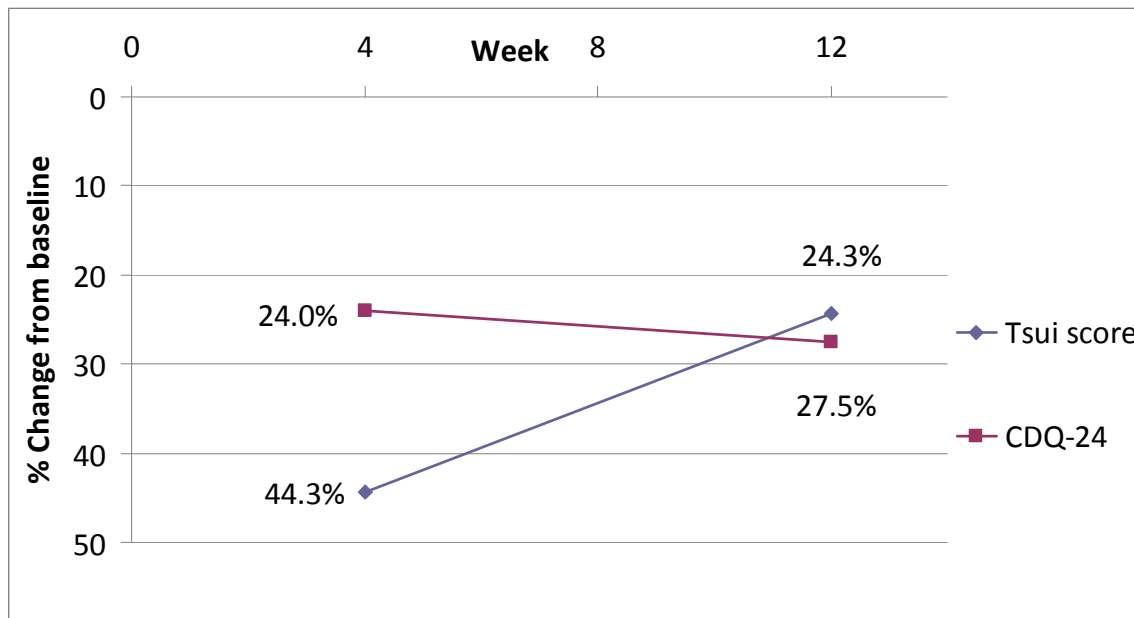

TSUI-Score: Week 4, n=503 patients; Week 12, n=490 patients.  
 CDQ-24: Week 4, n=483 patients; Week 12, n=473 patients.

Peer review only

**Figure 4:** Correlation between change in CDQ-24 total score and change in total Tsui score from baseline to Visit 2 (Week 4)

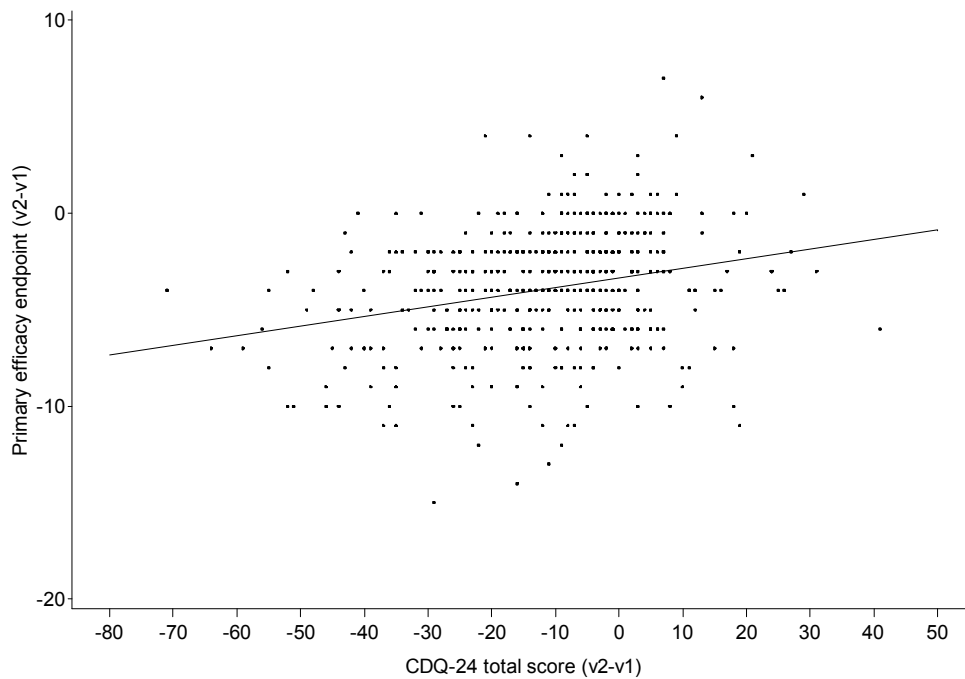

Display of raw data; one dot may represent more than one patient.

Correlation coefficient: 0.26,  $p < 0.001$ ,  $n = 484$ .

(Week 12: Correlation coefficient: 0.24,  $p < 0.001$ ,  $n = 474$ ).

## References

1. Crowner BE. Cervical dystonia: disease profile and clinical management. *Phys Ther* 2007;**87**:1511-26.
2. Van Zandijcke M. Cervical dystonia (spasmodic torticollis). Some aspects of the natural history. *Acta Neurol Belg* 1995;**95**:210-5.
3. Velickovic M, Benabou R and Brin MF. Cervical dystonia pathophysiology and treatment options. *Drugs* 2001;**61**:1921-43.
4. Simpson DM, Blitzer A, Brashear A *et al*. Assessment: Botulinum neurotoxin for the treatment of movement disorders (an evidence-based review): report of the Therapeutics and Technology Assessment Subcommittee of the American Academy of Neurology. *Neurology* 2008;**70**:1699-706.
5. Poewe W, Deuschl G, Nebe A *et al*. What is the optimal dose of botulinum toxin A in the treatment of cervical dystonia? Results of a double blind, placebo controlled, dose ranging study using Dysport. German Dystonia Study Group. *J Neurol Neurosurg Psychiatry* 1998;**64**:13-7.
6. Wissel J, Kanovsky P, Ruzicka E *et al*. Efficacy and safety of a standardised 500 unit dose of Dysport (clostridium botulinum toxin type A haemagglutinin complex) in a heterogeneous cervical dystonia population: results of a prospective, multicentre, randomised, double-blind, placebo-controlled, parallel group study. *J Neurol* 2001;**248**:1073-8.
7. Truong D, Duane DD, Jankovic J *et al*. Efficacy and safety of botulinum type A toxin (Dysport) in cervical dystonia: results of the first US randomized, double-blind, placebo-controlled study. *Mov Disord* 2005;**20**:783-91.
8. Truong D, Lew MF and al. e. Long-term efficacy and safety of botulinum toxin type A (Dysport) in cervical dystonia. *Parkinsonism Relat Disord* Submitted;
9. Molho ES, Agarwal N, Regan K *et al*. Effect of cervical dystonia on employment: A retrospective analysis of the ability of treatment to restore premorbid employment status. *Mov Disord* 2009;**24**:1384-7.
10. Camfield LB-S, Y. Warner, T.T. Epidemiological Study of Dystonia in Europe Collaborative Group Impact of cervical dystonia on quality of life. *Mov Disord* 2002;**17**:838-841.
11. Ben-Shlomo Y, Camfield L and Warner T. What are the determinants of quality of life in people with cervical dystonia? *J Neurol Neurosurg Psychiatry* 2002;**72**:608-14.
12. Muller J, Kemmler G, Wissel J *et al*. The impact of blepharospasm and cervical dystonia on health-related quality of life and depression. *J Neurol* 2002;**249**:842-6.

- 1
  - 2
  - 3
  - 4
  - 5
  - 6
  - 7
  - 8
  - 9
  - 10
  - 11
  - 12
  - 13
  - 14
  - 15
  - 16
  - 17
  - 18
  - 19
  - 20
  - 21
  - 22
  - 23
  - 24
  - 25
  - 26
  - 27
  - 28
  - 29
  - 30
  - 31
  - 32
  - 33
  - 34
  - 35
  - 36
  - 37
  - 38
  - 39
  - 40
  - 41
  - 42
  - 43
  - 44
  - 45
  - 46
  - 47
  - 48
  - 49
  - 50
  - 51
  - 52
  - 53
  - 54
  - 55
  - 56
  - 57
  - 58
  - 59
  - 60
13. Hefter H, Kupsch A, Müngersdorf M *et al.* A Botulinum Toxin A Treatment Algorithm for De Novo Management of Torticollis and Laterocollis. *BMJ Open* 2011; doi:10.1136/bmjopen-2011-000196
14. Tsui JK, Eisen A, Stoessl AJ *et al.* Double-blind study of botulinum toxin in spasmodic torticollis. *Lancet* 1986;**2**:245-7.
15. Muller J, Wissel J, Kemmler G *et al.* Craniocervical dystonia questionnaire (CDQ-24): development and validation of a disease-specific quality of life instrument. *J Neurol Neurosurg Psychiatry* 2004;**75**:749-53.
16. Rinnerthaler M, Mueller J, Weichbold V *et al.* Social stigmatization in patients with cranial and cervical dystonia. *Mov Disord* 2006;**21**:1636-40.
17. Tassorelli C, Mancini F, Balloni L *et al.* Botulinum toxin and neuromotor rehabilitation: An integrated approach to idiopathic cervical dystonia. *Mov Disord* 2006;**21**:2240-3.

1  
2  
3  
4  
5  
6  
7  
8  
9  
10  
11  
12  
13  
14  
15  
16  
17  
18  
19  
20  
21  
22  
23  
24  
25  
26  
27  
28  
29  
30  
31  
32  
33  
34  
35  
36  
37  
38  
39  
40  
41  
42  
43  
44  
45  
46  
47  
48  
49  
50  
51  
52  
53  
54  
55  
56  
57  
58  
59  
60

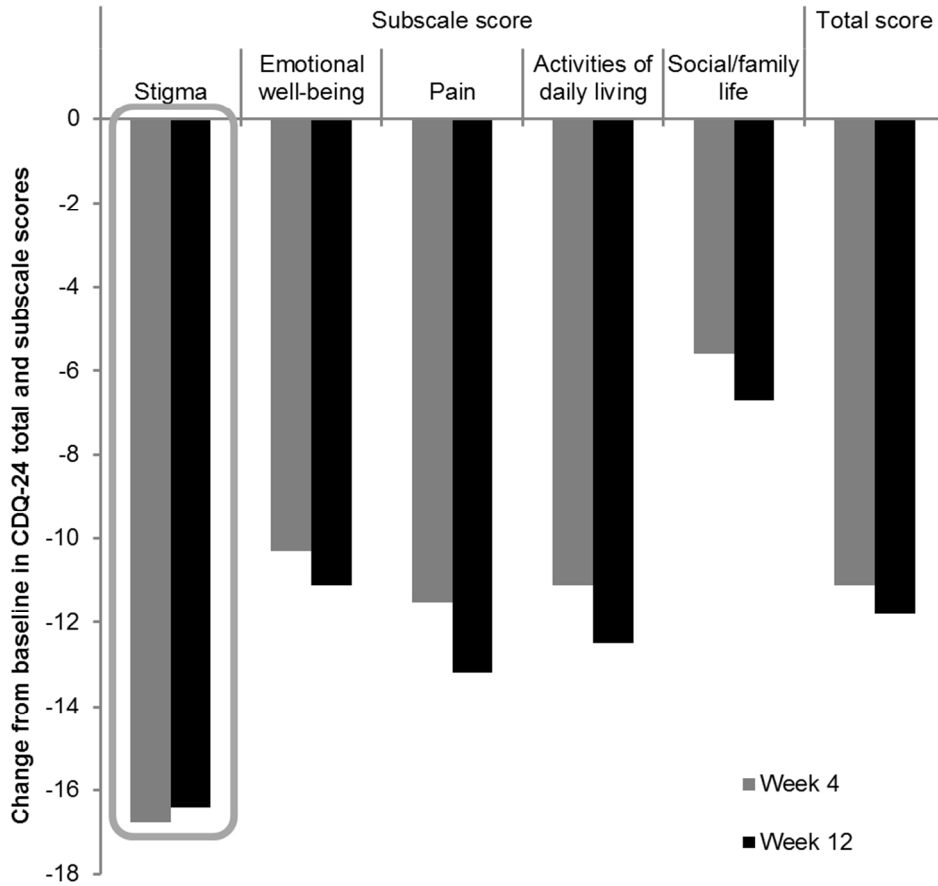

90x99mm (300 x 300 DPI)

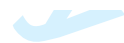

1  
2  
3  
4  
5  
6  
7  
8  
9  
10  
11  
12  
13  
14  
15  
16  
17  
18  
19  
20  
21  
22  
23  
24  
25  
26  
27  
28  
29  
30  
31  
32  
33  
34  
35  
36  
37  
38  
39  
40  
41  
42  
43  
44  
45  
46  
47  
48  
49  
50  
51  
52  
53  
54  
55  
56  
57  
58  
59  
60

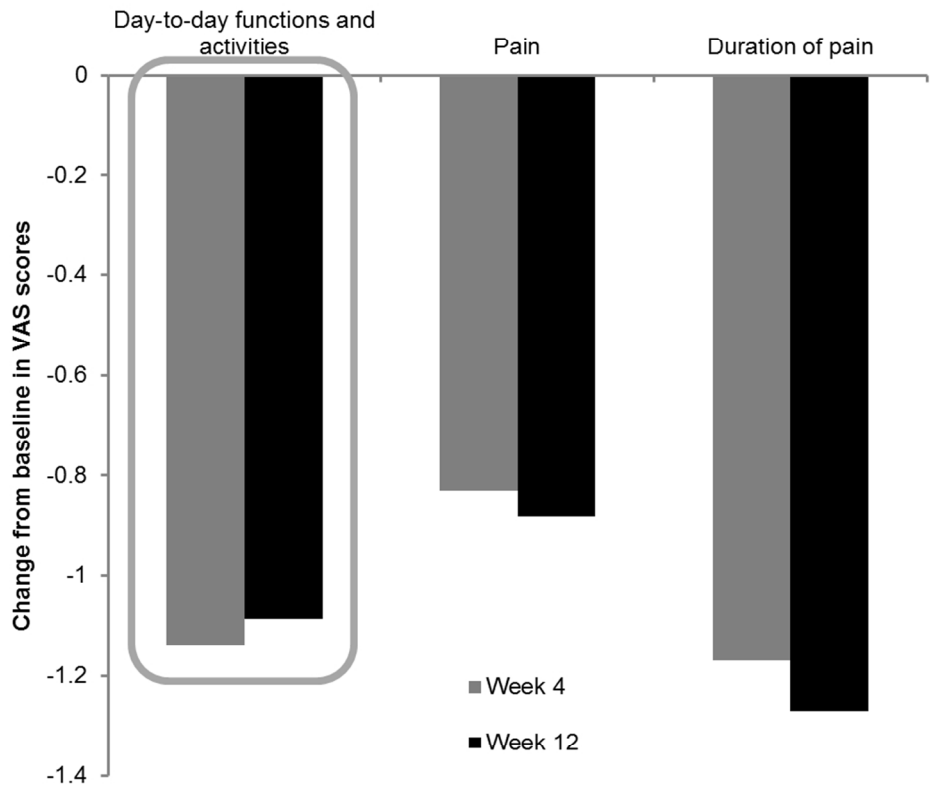

90x99mm (300 x 300 DPI)

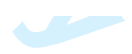



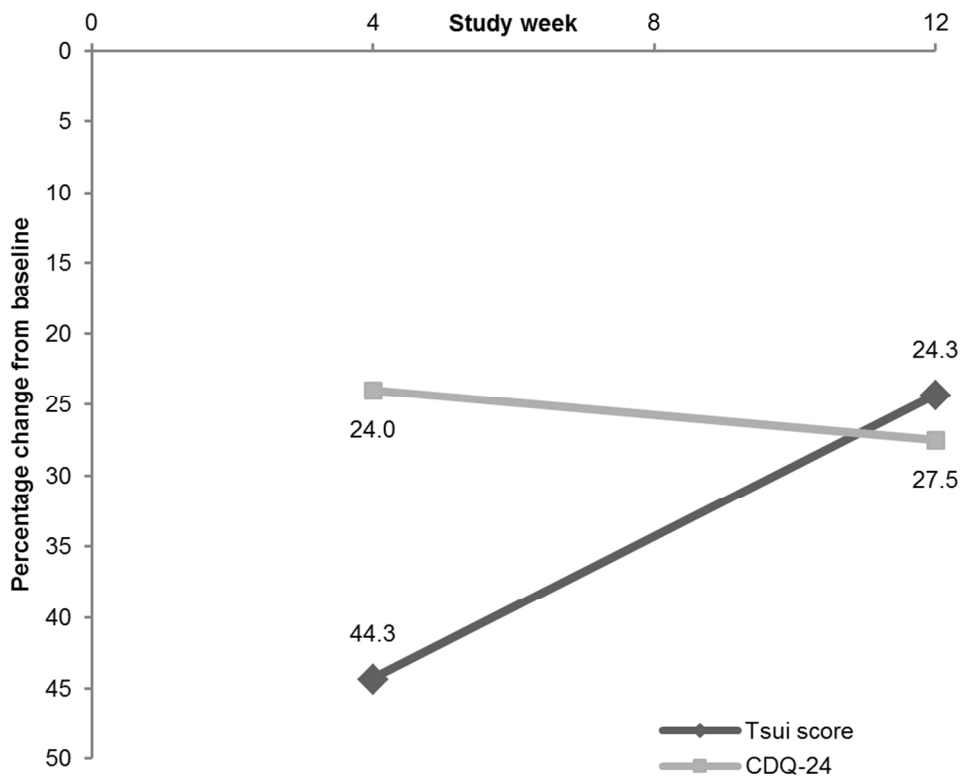

90x99mm (300 x 300 DPI)



1  
2  
3  
4  
5  
6  
7  
8  
9  
10  
11  
12  
13  
14  
15  
16  
17  
18  
19  
20  
21  
22  
23  
24  
25  
26  
27  
28  
29  
30  
31  
32  
33  
34  
35  
36  
37  
38  
39  
40  
41  
42  
43  
44  
45  
46  
47  
48  
49  
50  
51  
52  
53  
54  
55  
56  
57  
58  
59  
60

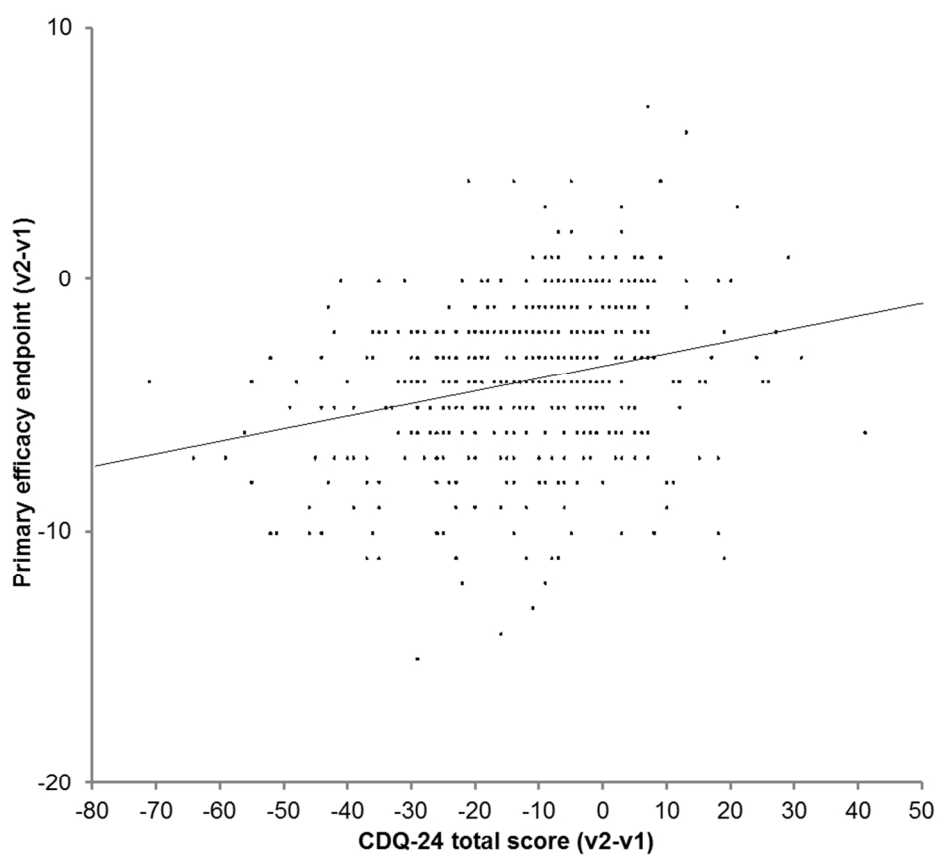

90x99mm (300 x 300 DPI)





**An open-label cohort study of the improvement of quality of life and pain in de novo cervical dystonia patients after injections with 500 U botulinum toxin A (Dysport®)**

|                                 |                                                                                                                                                                                                                                                                                                                                                                         |
|---------------------------------|-------------------------------------------------------------------------------------------------------------------------------------------------------------------------------------------------------------------------------------------------------------------------------------------------------------------------------------------------------------------------|
| Journal:                        | <i>BMJ Open</i>                                                                                                                                                                                                                                                                                                                                                         |
| Manuscript ID:                  | bmjopen-2012-001853.R1                                                                                                                                                                                                                                                                                                                                                  |
| Article Type:                   | Research                                                                                                                                                                                                                                                                                                                                                                |
| Date Submitted by the Author:   | 21-Feb-2013                                                                                                                                                                                                                                                                                                                                                             |
| Complete List of Authors:       | Hefter, Harald<br>Benecke, Rainer; University of Rostock, Department of Neurology<br>Erbguth, Frank; Klinikum Nürnberg, Department of Neurology<br>Jost, Wolfgang; Deutsche Klinik fuer Diagnostik, Neurology<br>Reichel, Gerhard; Deutsche Klinik für Diagnostik, Out-Patient Department of Neurology<br>Wissel, Joerg; Kliniken Beelitz GmbH, Department of Neurology |
| <b>Primary Subject Heading</b>: | Neurology                                                                                                                                                                                                                                                                                                                                                               |
| Secondary Subject Heading:      | Rehabilitation medicine                                                                                                                                                                                                                                                                                                                                                 |
| Keywords:                       | Neuromuscular disease < NEUROLOGY, Adult neurology < NEUROLOGY, REHABILITATION MEDICINE                                                                                                                                                                                                                                                                                 |
|                                 |                                                                                                                                                                                                                                                                                                                                                                         |

SCHOLARONE™  
Manuscripts

only

**Title:** An open-label cohort study of the improvement of quality of life and pain in *de novo* cervical dystonia patients after injections with 500 U botulinum toxin A (Dysport®)

**Authors:** Hefter H,<sup>1</sup> Benecke R,<sup>2</sup> Erbguth F,<sup>3</sup> Jost W,<sup>4</sup> Reichel G,<sup>5</sup> Wissel J<sup>6</sup>

**Affiliations:**

<sup>1</sup>Department of Neurology, University of Düsseldorf, Moorenstrasse 5, 40225 Düsseldorf, Germany

<sup>2</sup>Department of Neurology, University of Rostock, Gehlsheimer Str. 20, 18147 Rostock, Germany

<sup>3</sup>Department of Neurology, Klinikum Nürnberg, Breslauer Str. 201, 90471 Nürnberg, Germany

<sup>4</sup>Department of Neurology, Deutsche Klinik für Diagnostik, Aukammallee 33, 65191 Wiesbaden, Germany

<sup>5</sup>Out-Patient Department of Neurology, Paracelsus Klinik, Werdauer Strasse 68, 08060 Zwickau, Germany

<sup>6</sup>Department of Neurology, Kliniken Beelitz GmbH, Paracelsusring 6a, 14547 Beelitz-Heilstätten, Germany

**Corresponding author:**

Harald Hefter

Department of Neurology

University of Düsseldorf

Moorenstrasse 5

40225 Düsseldorf

Germany

Tel: +49 211 81 17 025

Fax: +49 211 81 04 903

Email: harald.hefter@online.de

“The Corresponding Author has the right to grant on behalf of all authors and does grant on behalf of all authors, an exclusive licence (or non-exclusive for government employees) on a worldwide basis to the BMJ Group and co-owners or contracting owning societies (where published by the BMJ Group on their behalf), and its Licensees to permit this article (if accepted) to be published in BMJ Open and any other BMJ Group products and to exploit all subsidiary rights, as set out in our licence.”

**Journal:** *BMJ Open*

**Word count (text)/limit:** 3675/4000

**Word count (abstract)/limit:** 293/300

1  
2 **Tables/Figures:** 0/4 (limit 5)

3 **References/limit:** 11/40

4  
5  
6 **Short title:** Dysport for treatment of cervical dystonia

7  
8  
9 **Clinical trials information:** (NCT00447772; clinicaltrials.gov)

10  
11  
12 **Key words (limit of 5):** *de novo* cervical dystonia, quality of life, pain, Dysport, abobotulinumtoxinA

13  
14  
15  
16  
17  
18  
19  
20  
21  
22  
23  
24  
25  
26  
27  
28  
29  
30  
31  
32  
33  
34  
35  
36  
37  
38  
39  
40  
41  
42  
43  
44  
45  
46  
47  
48  
49  
50  
51  
52  
53  
54  
55  
56  
57  
58  
59  
60

For peer review only

**Abstract**

**Objectives:** It remains to be determined whether the benefits of botulinum toxin type A (BoNT-A) on cervical dystonia (CD) motor symptoms extend to improvements in patient quality of life (QoL). This analysis of a large, multicentre study was conducted with the aim of investigating changes in QoL and functioning among *de novo* patients receiving 500 U BoNT-A (abobotulinumtoxinA; Dysport®) for the treatment of the two most frequent forms of cervical dystonia (CD), predominantly torticollis and laterocollis.

**Design:** Prospective, open-label study of Dysport (500 U; Ipsen Biopharm Ltd) administered according to a defined intramuscular injection algorithm.

**Setting:** German and Austrian outpatient clinics.

**Participants:** 516 male and female patients (aged  $\geq 18$  years) with *de novo* CD. The majority of patients had torticollis (78.1%). Thirty-five patients had concomitant depression (MedDRA-defined).

**Main outcome measures:** Change from baseline to Week 4 and Week 12 in Craniocervical Dystonia Questionnaire (CDQ-24) total and subscale scores, patient diary items ('day-to-day capacities and activities', 'pain', and 'duration of pain'), and global assessment of pain.

**Results:** Significant improvements were observed in CDQ-24 total and subscale scores at Week 4 and were sustained up to Week 12 ( $p < 0.001$ ). Changes in CDQ-24 scores did not significantly differ between the torticollis and laterocollis groups or between patients with or without depression. There were also significant reductions in patient diary item scores for activities of daily living, pain and pain duration at Weeks 4 and 12 ( $p < 0.001$ ). Pain relief (less or no pain) was reported by 66.0% and 74.1% of patients at Week 4 and Week 12, respectively. Changes in pain parameters demonstrated a positive relationship with change in Tsui score.

**Conclusions:** Standardized open-label treatment with Dysport 500 U leads to improvements in QoL and pain intensity up to 12 weeks in patients with CD.

## Article summary

### Article focus:

- To test the hypothesis whether a modification of clinical symptoms is correlated to quality of life (QoL) parameters after treatment with botulinum toxin type A (BoNT-A)
- Investigation of the QoL and pain reduction benefits of Dysport when administered for the *de novo* management of torticollis and laterocollis in a large cervical dystonia (CD) patient population

### Key messages:

- Dysport 500 U significantly improves QoL, as rated by CDQ-24, in *de novo* patients with heterogeneous forms of CD
- Dysport 500 U treatment leads to significant reductions in pain (on several outcome measures) in *de novo* patients with heterogeneous forms of CD

### Strengths and limitations of this study:

- This is the largest prospective, open-label cohort study of QoL in CD patients to date
- This study reflects the short-term effects of Dysport arising from a single 500 U administration; therefore, long-term studies are required to determine whether the observed beneficial effects on symptoms and QoL can be sustained with repeated treatment.

## INTRODUCTION

Cervical dystonia (CD), the most frequent form of focal dystonia, may present as idiopathic or secondary disease.[1] Idiopathic CDs are characterised by abnormal, involuntary muscle contractions, resulting in abnormal head movements and various undesired positions of the head.[2] The disorder is commonly classified as a function of the direction of abnormal head position – torticollis (turning of the head), laterocollis (head tilt), retrocollis (neck extension), antecollis (flexion), or, most frequently, a combination of the above.[3] Increased involuntary activity in affected muscles frequently leads to hypertrophy, and resulting symptoms include pain in the region of the neck and shoulder, decreased range of motion, and impairment of voluntary movement of the head. Reduction of muscle activity with local botulinum toxin type A (BoNT-A) injections is recommended as the first-line treatment option for CD.[4] The efficacy and tolerability of abobotulinumtoxinA (Dysport®, Ipsen Biopharm Ltd.) and other BoNT-A preparations for the treatment of CD has been demonstrated in randomised, placebo-controlled trials and open-label extension studies, with symptom relief being sustained for up to 3 months or 4 treatment cycles, respectively.[4-8]

Clinical symptoms of CD (for example, neck pain) cause significant disability that interferes with patients' daily functioning, such as the ability to remain in employment.[9] Moreover, a significant negative impact on quality of life (QoL) is seen with CD and is comparable to that seen with other serious disabling illnesses, such as multiple sclerosis, Parkinson's disease and stroke.[10] In a study of 289 patients with CD from seven European countries, concomitant depression was identified as one of the two strongest predictors of poor QoL (alongside anxiety), in addition to response to botulinum toxin, self-deprecation, stigma, and other patient-related factors.[11] Successful treatment of motor symptoms by existing treatments does not necessarily entail a positive influence on patient QoL.[12] It is, therefore, important to analyse whether clinically effective treatment of the movement disorder also leads to improvements in social and emotional wellbeing for patients and a positive impact on their daily functions and activities.

A large, prospective, open, multicentre study was conducted to evaluate the effectiveness and safety of a single dose of Dysport (500 U) for the treatment of the two most frequent forms of CD.[13] Treatment was given according to a standardised algorithm based on the two most frequent forms of CD, predominantly torticollis and laterocollis. Evaluated over 12 weeks, CD symptom severity was assessed using an established scale (the Tsui scale), with the patient in a standardised seated position.[14] Results from the study showed that Dysport was effective and well tolerated for the *de novo* management of a range of heterogeneous forms of CD, when using a standardised regimen that allows tailored dosing based on individual symptom assessment.[13] QoL parameters were assessed as secondary objectives throughout the study using a patient disease questionnaire (Cranio-cervical Dystonia Questionnaire; CDQ-24)[15] and patient diaries.



1 Here, we present results of the QoL objectives, which aimed to determine the effects of treatment  
2 with Dysport 500 U on patient QoL, and everyday functions and activities. Pain may exert an  
3 influence on the patient's rating of the efficacy of BoNT-A therapy, which is not taken into account  
4 using the Tsui score. Consequently, pain was additionally evaluated using the above-mentioned  
5 measures.  
6  
7  
8  
9  
10  
11  
12  
13  
14  
15  
16  
17  
18  
19  
20  
21  
22  
23  
24  
25  
26  
27  
28  
29  
30  
31  
32  
33  
34  
35  
36  
37  
38  
39  
40  
41  
42  
43  
44  
45  
46  
47  
48  
49  
50  
51  
52  
53  
54  
55  
56  
57  
58  
59  
60

## METHODS

### Study design, patients and treatment

This was a non-controlled, prospective, multicentre, open-label study conducted in Germany and Austria to investigate the comparable effectiveness and safety of 500 U Dysport for the treatment of patients (aged  $\geq 18$  years) with heterogeneous forms of CD, naïve to BoNT-A. Full details of study design, and inclusion and exclusion criteria, have been published previously by Heffer et al. and are available through BMJ Open.[13]

All patients received a single intramuscular injection with 500 U Dysport, diluted in 2.5 mL 0.9% NaCl. Full details of the standardised injection protocol based on the symptoms assessed with the Tsui score have also been published previously.[13]

### Assessments

The severity of CD was assessed by the investigating physicians at Visit 1 (Week 0; baseline), Visit 2 (Week 4) and Visit 3 (Week 12) using the Tsui rating scale total score under standardised conditions, with the patient in a relaxed seated position. The primary efficacy outcome measure was the change from baseline to Week 4 in total Tsui score after treatment.[13]

### CDQ-24

The effects of treatment on QoL, pain and any restrictions of possible everyday functions and activities of the patient were assessed in comparison to baseline values using the validated CDQ-24.[15] The CDQ-24 is a disease-specific QoL instrument designed to investigate problems in daily living skills related to CD, and comprises 24 items within five domains related to stigma (questions 7, 8, 9, 10, 18, 22); emotional wellbeing (questions 11, 12, 13, 14, 15); pain (questions 4, 5, 21); activities of daily living (questions 1, 2, 3, 6, 19, 20); and social/family life (questions 16, 17, 23, 24). Scores for each item range from 0 to 4, representing increasing severity of impairment. In order to obtain scores for the individual subscales, the total score of each subscale (sum of the individual item scores) was transformed linearly to a 0 to 100 scale, where a score of 0 indicates the best and a score of 100 the worst possible QoL (which explains why some subscores, e.g. stigma, have higher values than the total score). Assessment of the CDQ-24 was conducted at baseline (Visit 1), Week 4 (Visit 2) and Week 12 (Visit 3).

### Patient diary

Patients were provided with a diary, which was used to self-record weekly ratings (on an 11-point visual analogue scale; VAS) for items related to 'Day-to-day capacities and activities' (0 = not affected, 10 = very severely affected), 'Pain' (0 = no pain, 10 = strongest imaginable pain) and 'Duration of pain' (0 = never pain, 10 = constant pain). Assessment of the patient diary was conducted at baseline (Visit 1), Week 4 (Visit 2) and Week 12 (Visit 3).

### *Global assessment of pain*

At Visits 2 and 3, patients were required to assess change of pain associated with CD according to the following response categories: 1 = no pain (anymore); 2 = less pain; 3 = no change; 4 = more pain.

### **Statistical analyses**

All efficacy and QoL assessments were conducted in the intent-to-treat (ITT) population (i.e. all patients of the safety population with a baseline [Visit 1, Week 0] and a post-baseline [Visit 2, Week 4 or Visit 3, Week 12] assessment of the Tsui rating scale).

Time course was analysed over Visits 1, 2 and 3 or Week 0, 4, 12, respectively, of CDQ-24 subscale 'pain', diary item 'pain', global assessment of pain (at Visits 2 and 3) and CDQ-24 total score for patients with valid data for all three pain assessments at all visits.

Inferential analyses of CDQ-24 total score and subscale changes from baseline at Visits 2 and 3 were conducted for the total population and by main type of CD. Descriptive and inferential analyses of diary item changes from baseline at Weeks 4 and 12 were performed for the total population and by main type of CD. Descriptive analyses of standardized pain measures (global assessment of pain by patient at Visits 2 and 3; CDQ-24 'pain' change from baseline at Visits 2 and 3; diary items 'pain' and 'pain duration' changes from baseline at Weeks 4 and 12) were assessed by main type of CD. All pain statements were documented differently; in order to allow comparisons between the different assessments, all pain measures were converted to a common scale using the following categories for change from baseline: *less or no pain; no change; or more pain*.

Pearson correlation analyses were performed of total Tsui score change from baseline at Visit 2 and diary items 'pain' and 'pain duration' changes from baseline at Week 4, and CDQ-24 subscale 'pain' change from baseline at Week 4. In addition, Pearson correlation analyses were performed between CDQ-24 total score and subscale score changes from baseline and changes from baseline for items of the patient diary.

Additional *post-hoc* analyses were carried out to investigate the impact of concomitant depression on treatment effectiveness and QoL.

## RESULTS

### Patient disposition and demographics

Baseline demographic, safety and tolerability data for all patients are available in the 2011 BMJ Open article by Heffer et al.[13] Of the 516 patients enrolled in the study, safety data were available for all but one patient (safety population: n=515). At least one adverse event was experienced by 213 (41.4%) of patients, of which 155 (30.1%) were considered to be related to study medication. Data of the Tsui rating scale at baseline (visit 1) and at least one post-baseline visit (visit 2 or 3) were available in 503 patients (ITT population). Overall, 26 patients discontinued the study prematurely, with the main reasons cited as insufficient compliance and lost to follow-up.

The majority of patients had torticollis (n=402; 78.1%; 112 patients [21.7%] had laterocollis; type of CD was unknown in one patient). Baseline characteristics were generally similar between patients with torticollis and laterocollis, as shown by Heffer et al. (2011).[13] The proportion of patients with tremor was similar in both torticollis (36.1%) and laterocollis (36.6%) groups. However, approximately half of the laterocollis patients (47.3%) were affected by shoulder elevation compared with only one-third of torticollis patients (31.3%). The majority of patients in the total population (56.5%) were affected by pain (torticollis: 54.5%; laterocollis: 64.3%).

Mean CDQ-24 total score at baseline for the overall patient population was 39.6 ( $\pm 18.8$  [39.8 for ITT population]). Baseline mean CDQ-24 total scores did not differ markedly between the main CD types: torticollis (39.9) and laterocollis (38.8).

After analysis of the study data, 35 patients were identified with depression as concomitant disease, according to the preferred MedDRA term (6.8% of the total population). The Tsui score at baseline was comparable between patients with (n=34) and without (n=469) depression (8.6 and 8.4, respectively), as well as the decrease in Tsui score at Week 4 minus baseline ( $-4.0$  and  $-3.8$ , respectively).

### Treatments and dosing

All treated patients received Dysport 500 U at baseline, with the exception of three patients who received 360, 400 and 460 U. The most frequently reported concomitant medications (>10% of patients) by therapeutic class were beta-blocking agents (19.0%), agents acting on the renin-angiotensin system (14.4%), psychoanaleptics (13.6%), thyroid therapy (13.0%) and analgesics (10.1%). Use of concomitant medication was similar across CD subtypes.

### CDQ-24

In the total patient population, treatment with Dysport was associated with a statistically significant improvement in the CDQ-24 total score from baseline at Week 4 (decrease of 11.1 points [95%

1 confidence interval (CI)  $-12.5, -9.6$ ]; mean score: 28.7), which was maintained up to Week 12  
2 (decrease of 11.8 points [95% CI  $-13.1, -10.4$ ]; mean score: 28.0) (Figure 1,  $p < 0.001$  at Week 4  
3 and Week 12 vs. baseline).  
4  
5

6  
7  
8 At Week 4 and Week 12, Dysport treatment significantly improved all CDQ-24 subscale scores  
9 from baseline (Figure 1,  $p < 0.001$ ). Patient-rated QoL at baseline was highest (worst) for subscale  
10 'stigma' (mean score: 50.4) and lowest (best) for social/family life (mean score: 21.9). Accordingly,  
11 mean changes from baseline (at Week 4 and Week 12) were highest for subscale 'stigma' ( $-16.8$   
12 [95% CI  $-19.0, -14.7$ ] and  $-16.4$  [95% CI  $-18.4, -14.3$ ], respectively) and lowest for subscale  
13 'social/family life' ( $-5.6$  [95% CI  $-7.2, -4.0$ ] and  $-6.7$  [95% CI  $-8.3, -5.1$ ], respectively). For all  
14 subscales, except 'stigma', continued improvement was seen from Week 4 through to Week 12.  
15 The small worsening in 'stigma' seems marginal when compared with the improvements seen in  
16 other categories, but correlates with an increasing Tsui score between Week 4 and Week 12.  
17  
18  
19  
20  
21

22  
23 There were no statistically significant differences in QoL results between the torticollis and  
24 laterocollis groups (for total score and subscores).  
25  
26

27  
28 Higher CDQ-24 total scores were recorded for the subgroup of patients with depression, with mean  
29 scores at Visit 1 (baseline), Visit 2 and Visit 3 of 51.8, 41.7 and 38.5, respectively, compared with  
30 38.9, 27.8 and 27.2, respectively, for those without depression. However, the changes in CDQ-24  
31 total score from baseline to Week 4 and Week 12 were comparable between patients with and  
32 without depression. The difference between patients with and without depression was most  
33 apparent for the CDQ-24 subscale 'emotional wellbeing' at Visit 1, 2, and 3: mean scores of 57.5,  
34 47.4 and 43.8, respectively, for patients with depression, and 38.0, 27.7 and 26.7, respectively, for  
35 those without depression. No differences were observed for CDQ-24 total scores between the  
36 torticollis and laterocollis groups of patients with depression. However, a noticeably smaller change  
37 from baseline to Visit 2 was seen in the depressed laterocollis subgroup for 'emotional wellbeing'  
38 ( $-4.5$ ) when compared with the depressed torticollis subgroup ( $-12.5$ ).  
39  
40  
41  
42  
43  
44  
45

#### 46 **Patient diary**

47 Similar to the results for CDQ-24, patients' diaries reflected positive treatment effects of Dysport on  
48 the VAS-assessed activities of daily living, pain and pain duration (mean  $\pm$  standard deviation  
49 [ $\pm$ SD] baseline values  $5.3 \pm 2.8$ ,  $4.1 \pm 3.0$  and  $4.7 \pm 3.4$  points, respectively). As shown in Figure 2,  
50 for the total population, 'Pain', 'Pain duration' and 'Day-to-day functions and activities' significantly  
51 improved at Week 4 and Week 12 versus baseline ( $p < 0.001$ ). For 'Pain' and 'Pain duration', there  
52 was further mild improvement from Week 4 to Week 12.  
53  
54  
55  
56  
57  
58  
59  
60

1  
2 Descriptive and t-test statistical analyses of diary item changes of the CD subgroups (torticollis and  
3 laterocollis) from baseline to Week 4 and Week 12 showed that all changes were statistically  
4 significant ( $p < 0.05$ ), with the exception of change of 'Day-to-day functions and activities' of  
5 laterocollis patients between baseline and Week 12 ( $p = 0.0531$ ). There were no other statistically  
6 significant differences in patient diary results in the torticollis and laterocollis subgroups.  
7  
8

### 9 10 11 **Global assessment of pain**

12 Most patients judged pain relief higher at Week 12 than at Week 4. Pain relief (less or no pain) was  
13 perceived by 330 patients (66.0%) at Week 4 and by 363 patients (74.1%) at Week 12 (no change:  
14 16.4% at Week 4 and 16.9% at Week 12; more pain: 17.6% at Week 4 and 9.0% at Week 12).  
15  
16

### 17 18 19 **Results of correlation analyses**

#### 20 *CDQ-24 and Tsui score*

21 Total CDQ-24 and all CDQ-24 subscores correlated significantly at baseline with Tsui score  
22 ( $p < 0.001$ ), with a correlation coefficient (R) varying between 0.17 and 0.27. Comparing the time  
23 course of Tsui score and QoL, the positive trend of the CDQ-24 total score at Week 4 (24%  
24 improvement) continued up to Week 12 (27.5% improvement), although the Tsui total score  
25 deteriorated between Week 4 (44.3% improvement) and Week 12 (24.3% improvement) in all  
26 patients (Figure 3). Nevertheless, statistically significant correlations ( $p < 0.001$ ) were seen between  
27 changes from baseline to Visits 2 (Figure 4) and 3 in total CDQ-24 score and in Tsui total score,  
28 but the correlation at Week 4 was slightly higher ( $R = 0.26$ ) than at Week 12 ( $R = 0.24$ ). Correlations  
29 ( $R < 0.3$ ) were also seen between changes from baseline to Visits 2 and 3 in individual CDQ-24  
30 subscale scores and in Tsui total score, which were statistically significant ( $p < 0.001$ ) for 'stigma',  
31 'emotional wellbeing', 'pain' and 'activities of daily living'. For social/family life, the correlation was  
32 significant at Week 4 ( $p < 0.01$ ) but not at Week 12 ( $p = 0.054$ ).  
33  
34  
35  
36  
37  
38  
39  
40  
41

#### 42 *Pain and Tsui score*

43 A correlation was found between the global pain assessment and the Tsui score for the total  
44 population: patients with an assessment of 'less pain' had a higher decrease in mean Tsui score at  
45 Week 4 ( $-4.5$ ) than patients with 'no change in pain' ( $-3.0$ ) and patients with 'more pain' ( $-3.2$ ),  
46 respectively. The highest decrease in mean Tsui score (Visit 2 vs. baseline:  $-4.9$ ) was achieved by  
47 patients in the laterocollis group in which 64.3% of the patients had reported pain at baseline vs.  
48 54.5% in the torticollis group.  
49  
50  
51  
52

#### 53 *Global assessment of pain, CDQ-24 subscale pain and patient diary pain*

54 Overall, a significant positive relationship ( $p < 0.001$ ) was seen between all pain parameters (i.e.  
55 CDQ-24, patient diary and global assessment of pain), with the CDQ subscale pain and the diary  
56 item of 'pain duration' showing the lowest correlation ( $R = 0.36$ ). The correlation between patient  
57  
58  
59  
60

1  
2 global assessment of pain and the pain intensity in the patient diary resulted in a much higher  
3 correlation coefficient ( $R=0.46$ ).  
4

5  
6 The percentage of patients reporting a global improvement of pain at Week 4 (66.0%) was higher  
7 than the percentage of patients documenting a pain improvement in their diaries (50.2–52.3%). At  
8 Week 12, the discrepancy was even higher between global improvement of pain (74.1%) and the  
9 percentage of patients documenting pain improvement in their diaries at this time point (48.3–  
10 55.2%).  
11

#### 12 *CDQ-24 activities of daily living and patient diary daily activities*

13  
14 Comparing all CDQ subscales with the patient diary, the highest correlations in the total population  
15 (and for both CD types) were observed between the patient diary item of 'Day-to-day function' and  
16 the CDQ-24 subscale of 'Activities of daily living' and 'Stigma', with  $R=0.48$  and  $0.37$  (for total  
17 population), respectively, at Week 4, and  $R=0.43$  and  $0.38$  (for total population), respectively, at  
18 Week 12 ( $p<0.001$ ).  
19  
20  
21  
22  
23  
24  
25  
26  
27  
28  
29  
30  
31  
32  
33  
34  
35  
36  
37  
38  
39  
40  
41  
42  
43  
44  
45  
46  
47  
48  
49  
50  
51  
52  
53  
54  
55  
56  
57  
58  
59  
60

## DISCUSSION

The results from this study, the largest published, prospective, open-label cohort study of *de novo* patients with CD to date, demonstrate that a single dose of 500 U Dysport leads to an improvement in disease-related impairment of QoL, as assessed by CDQ-24. Notably, the CDQ-24 results in Week 12 were better than those recorded in Week 4, despite an increase (worsening) of Tsui score (Figure 3), suggesting that improvements in QoL are maintained for a clinically significant duration. Our findings imply that the positive effects of BONT-A following treatment are encouraging to patients and helps them to gain perspective on their condition. Improvement of QoL seems to be better at Week 12, just before the second injection, compared to Week 4 when the injection has its maximal effect. This aspect and the weak correlation between improvement in CDQ-24 and Tsui underscore the involvement of additional factors beyond abnormal head posture in influencing QoL in CD. We believe that patients appreciate improvements in their condition relative to baseline and that severity of CD can systematically be reduced by repetitive injections every 3 months. This perspective potentially accounts for better scores at Week 12 compared to Week 4. Additionally, greater improvement at Week 12 compared with Week 4 may reflect the ability of the CDQ-24 to capture longer-term changes in QoL.[15]

Improvement of QoL items linked to abnormal head posture, such as stigma, did however follow the temporal course of head position, with worse scores at Week 12 than at Week 4. This is in contrast to the other subscales of the CDQ-24, which all showed continued improvement. Stigma is associated with the worst baseline CDQ-24 subscale score for all patients. The appearance of patients can be seriously affected by involuntary movements seen in CD and self-perceived stigma can be a major source of disability.[11, 16] Indeed, results from the present study show that stigma is seemingly important for the everyday function of patients, with a positive correlation being observed between the CDQ-24 subscale 'Stigma' and the diary item of 'Day-to-day functions and activities'.

Pain is another important factor influencing QoL. Interestingly, better improvements in pain were recorded when the clinician was present for the assessment (global assessment of pain) than rated by the patients using their diaries at home. Regardless, systematic improvement of pain, not only of pain intensity but also of pain duration, were reported by all assessments. In general, an improvement of Tsui score correlated positively with an improvement of pain in this study, with patients recording less pain on the global pain assessment achieving the greatest reduction in Tsui total score.

In this study, patients with depression as concomitant disease showed worse QoL scores at baseline. Importantly, following Dysport treatment, patients with depression experienced similar



1 benefits to those without depression, as demonstrated by similar changes from baseline at Week 4  
2 and Week 12 for the Tsui score, and for QoL between the depressed and non-depressed  
3 subgroups. The ability of BONT-A treatment to improve QoL in the presence of concomitant  
4 depression is particularly pertinent in view of published observations highlighting the role of  
5 depression as a key determinant of poor QoL in patients with CD.[11]  
6  
7  
8  
9

10 Although laterocollis patients responded well according to Tsui score, pain appeared to be more  
11 common in this patient group than in patients with torticollis. The higher proportion of shoulder  
12 elevation in laterocollis patients may be one possible explanation for the increased rate of  
13 documented pain in these patients. As presented previously,[13] improvements in CD symptoms  
14 were confirmed by investigator and patient global assessment of symptoms without distinct  
15 (significant) group differences, although laterocollis patients experienced more frequent severe  
16 muscle weakness as an adverse event than torticollis patients (8.9% laterocollis, n=10 vs. 1.7%  
17 torticollis, n=7). Investigator and patient ratings of tolerability also varied most in the laterocollis  
18 group at Week 4, which could probably be explained by the higher rate of severe muscular  
19 weakness reported in these patients.[13] Although torticollis and laterocollis patients showed the  
20 same clinical response in the Tsui score, there are obviously differences between the two groups  
21 in disease perception. More analyses of the available study data including side effects, such as  
22 muscular weakness, may help to understand these apparent inconsistencies. Moreover, further  
23 studies may clarify if this was a random effect or if these patients would benefit from longer  
24 treatment duration with Dysport. Finally, the specific head position, i.e. whether the head is tilted or  
25 rotated, does not seem to play an essential role in emotional and social wellbeing; patients with  
26 either torticollis or laterocollis demonstrated comparable results in the CDQ-24 subscale 'emotional  
27 wellbeing' at baseline.  
28  
29  
30  
31  
32  
33  
34  
35  
36  
37  
38  
39

40 The results from this study support those from a published study by Ben-Shlomo *et al.*, which  
41 demonstrated that, in addition to disease severity, QoL in patients with CD is predominantly  
42 determined by factors such as self-esteem, self-deprecation, stigma and depression.[11]  
43 Consequently, the care of these patients should not only focus on the reduction of CD symptom  
44 severity, but also on the improvement of the patient's psychological wellbeing. The use of  
45 pharmacological treatments with the ability to reduce disease severity has been shown to have a  
46 major benefit on both the physical and mental wellbeing of CD patients.[11] Recent controlled  
47 studies, for example,[17] have shown that short-term treatment with a combination of  
48 pharmacological therapy (BoNT-A) and a physical treatment programme (comprising self-control  
49 techniques and counselling) may be more effective than a sole pharmacological intervention.  
50 Therefore, further studies investigating the long-term effects of pure pharmacological and  
51 multidimensional treatment programmes on QoL are warranted.  
52  
53  
54  
55  
56  
57  
58  
59  
60

1 In conclusion, CD is a disabling and often painful illness that interferes with activities of daily living.  
2  
3 As a result, CD has a significant adverse impact on patient's physical and mental wellbeing and  
4  
5 QoL. Results from this large, prospective, open-label study support the ability of Dysport 500 U to  
6  
7 provide sustained efficacy in reducing motor symptoms coincident with significant improvements in  
8  
9 pain and QoL among patients with CD, and provide the foundation for further investigation in  
10  
11 randomised, controlled studies.

### 12 **Acknowledgements**

14 This study was supported by Ipsen Pharma GmbH, Germany. Data management and statistical  
15  
16 analyses were performed by GKM Gesellschaft für Therapieforschung in Munich, Germany.  
17  
18 Editorial assistance for the preparation of this manuscript was provided by Ogilvy Healthworld  
19  
20 Medical Education; funding was provided by Ipsen Pharma GmbH. The authors would like to thank  
21  
22 Christiane Colling, PhD, Medical Project Manager, Ipsen Pharma GmbH, for her assistance in the  
23  
24 conduct of the study and for review of the manuscript.

### 25 **Competing interests (this article)**

26 No competing interests. HH was the coordinating investigator of this study.  
27  
28

### 29 **Competing interests (previous 12 months)**

30 All authors are consultants for Ipsen.  
31  
32

### 33 **Funding**

34 Funding was provided by Ipsen Pharma GmbH.  
35  
36  
37

### 38 **Author contributions:**

39 All authors were involved in the concept and study design, study conduct, data collection, analysis  
40  
41 and interpretation, manuscript writing, review and critique. All authors approved the final  
42  
43 manuscript.  
44  
45  
46  
47  
48  
49  
50  
51  
52  
53  
54  
55  
56  
57  
58  
59  
60

1  
2 **Figure 1:** Change in CDQ-24 total and subscale scores from baseline to Weeks 4 and 12 (ITT:  
3 total population).

4  
5 Total score and all subscores differed significantly from baseline to Week 4 and Week 12 ( $p < 0.001$   
6 at Week 4 and Week 12 vs. baseline).

7 ITT, intent-to-treat.

8 \*Change from baseline score was worse at Week 12 vs. Week 4.

9  
10  
11 **Figure 2:** Change in patient diary visual analogue score (VAS) from baseline to Weeks 4 and 12  
12 (ITT: total population).

13  
14 t-test analysis:  $p < 0.001$  at Week 4 and Week 12 vs. baseline.

15 ITT, intent-to-treat.

16 \*Change from baseline score was worse at Week 12 vs. Week 4.

17  
18  
19 **Figure 3:** Time course of change in total Tsui score and total CDQ24 score.

20  
21  
22 TSUI-Score: Week 4,  $n = 503$  patients; Week 12,  $n = 490$  patients.

23 CDQ-24: Week 4,  $n = 483$  patients; Week 12,  $n = 473$  patients.

24  
25  
26  
27 **Figure 4:** Correlation between change in CDQ-24 total score and change in total Tsui score from  
28 baseline to Week 4.

29  
30 Display of raw data; one dot may represent more than one patient.

31 Correlation coefficient: 0.26,  $p < 0.001$ ,  $n = 484$ .

32 (Week 12: Correlation coefficient: 0.24,  $p < 0.001$ ,  $n = 474$ ).

## References

1. Crowner BE. Cervical dystonia: disease profile and clinical management. *Phys Ther* 2007;**87**:1511-26.
2. Van Zandijcke M. Cervical dystonia (spasmodic torticollis). Some aspects of the natural history. *Acta Neurol Belg* 1995;**95**:210-5.
3. Velickovic M, Benabou R and Brin MF. Cervical dystonia pathophysiology and treatment options. *Drugs* 2001;**61**:1921-43.
4. Simpson DM, Blitzer A, Brashear A *et al*. Assessment: Botulinum neurotoxin for the treatment of movement disorders (an evidence-based review): report of the Therapeutics and Technology Assessment Subcommittee of the American Academy of Neurology. *Neurology* 2008;**70**:1699-706.
5. Poewe W, Deuschl G, Nebe A *et al*. What is the optimal dose of botulinum toxin A in the treatment of cervical dystonia? Results of a double blind, placebo controlled, dose ranging study using Dysport. German Dystonia Study Group. *J Neurol Neurosurg Psychiatry* 1998;**64**:13-7.
6. Wissel J, Kanovsky P, Ruzicka E *et al*. Efficacy and safety of a standardised 500 unit dose of Dysport (clostridium botulinum toxin type A haemagglutinin complex) in a heterogeneous cervical dystonia population: results of a prospective, multicentre, randomised, double-blind, placebo-controlled, parallel group study. *J Neurol* 2001;**248**:1073-8.
7. Truong D, Duane DD, Jankovic J *et al*. Efficacy and safety of botulinum type A toxin (Dysport) in cervical dystonia: results of the first US randomized, double-blind, placebo-controlled study. *Mov Disord* 2005;**20**:783-91.
8. Truong D, Lew MF and al. e. Long-term efficacy and safety of botulinum toxin type A (Dysport) in cervical dystonia. *Parkinsonism Relat Disord* Submitted;
9. Molho ES, Agarwal N, Regan K *et al*. Effect of cervical dystonia on employment: A retrospective analysis of the ability of treatment to restore premorbid employment status. *Mov Disord* 2009;**24**:1384-7.
10. Camfield LB-S, Y. Warner, T.T. Epidemiological Study of Dystonia in Europe Collaborative Group Impact of cervical dystonia on quality of life. *Mov Disord* 2002;**17**:838-41.
11. Ben-Shlomo Y, Camfield L and Warner T. What are the determinants of quality of life in people with cervical dystonia? *J Neurol Neurosurg Psychiatry* 2002;**72**:608-14.
12. Muller J, Kemmler G, Wissel J *et al*. The impact of blepharospasm and cervical dystonia on health-related quality of life and depression. *J Neurol* 2002;**249**:842-6.
13. Hefter H, Kupsch A, Müngersdorf M *et al*. A Botulinum Toxin A Treatment Algorithm for De Novo Management of Torticollis and Laterocollis. *BMJ Open* 2011;1:e000196. doi:10.1136/bmjopen-2011-000196
14. Tsui JK, Eisen A, Stoessl AJ *et al*. Double-blind study of botulinum toxin in spasmodic torticollis. *Lancet* 1986;**2**:245-7.
15. Muller J, Wissel J, Kemmler G *et al*. Craniocervical dystonia questionnaire (CDQ-24): development and validation of a disease-specific quality of life instrument. *J Neurol Neurosurg Psychiatry* 2004;**75**:749-53.
16. Rinnerthaler M, Mueller J, Weichbold V *et al*. Social stigmatization in patients with cranial and cervical dystonia. *Mov Disord* 2006;**21**:1636-40.

- 1  
2  
3  
4  
5  
6  
7  
8  
9  
10  
11  
12  
13  
14  
15  
16  
17  
18  
19  
20  
21  
22  
23  
24  
25  
26  
27  
28  
29  
30  
31  
32  
33  
34  
35  
36  
37  
38  
39  
40  
41  
42  
43  
44  
45  
46  
47  
48  
49  
50  
51  
52  
53  
54  
55  
56  
57  
58  
59  
60
17. Tassorelli C, Mancini F, Balloni L *et al*. Botulinum toxin and neuromotor rehabilitation: An integrated approach to idiopathic cervical dystonia. *Mov Disord* 2006;**21**:2240-3.

For peer review only

**Title:** An open-label cohort study of the improvement of quality of life and pain in *de novo* cervical dystonia patients after injections with 500 U botulinum toxin A (Dysport®)

**Authors:** Hefter H,<sup>1</sup> Benecke R,<sup>2</sup> Erbguth F,<sup>3</sup> Jost W,<sup>4</sup> Reichel G,<sup>5</sup> Wissel J<sup>6</sup>

**Affiliations:**

<sup>1</sup>Department of Neurology, University of Düsseldorf, Moorenstrasse 5, 40225 Düsseldorf, Germany

<sup>2</sup>Department of Neurology, University of Rostock, Gehlsheimer Str. 20, 18147 Rostock, Germany

<sup>3</sup>Department of Neurology, Klinikum Nürnberg, Breslauer Str. 201, 90471 Nürnberg, Germany

<sup>4</sup>Department of Neurology, Deutsche Klinik für Diagnostik, Aukammallee 33, 65191 Wiesbaden, Germany

<sup>5</sup>Out-Patient Department of Neurology, Paracelsus Klinik, Werdauer Strasse 68, 08060 Zwickau, Germany

<sup>6</sup>Department of Neurology, Kliniken Beelitz GmbH, Paracelsusring 6a, 14547 Beelitz-Heilstätten, Germany

**Corresponding author:**

Harald Hefter

Department of Neurology

University of Düsseldorf

Moorenstrasse 5

40225 Düsseldorf

Germany

Tel: +49 211 81 17 025

Fax: +49 211 81 04 903

Email: harald.hefter@online.de

“The Corresponding Author has the right to grant on behalf of all authors and does grant on behalf of all authors, an exclusive licence (or non-exclusive for government employees) on a worldwide basis to the BMJ Group and co-owners or contracting owning societies (where published by the BMJ Group on their behalf), and its Licensees to permit this article (if accepted) to be published in BMJ Open and any other BMJ Group products and to exploit all subsidiary rights, as set out in our licence.”

**Journal:** *BMJ Open*

**Word count (text)/limit:** 3675/4000

**Word count (abstract)/limit:** 293/300

1  
2 **Tables/Figures:** 0/4 (limit 5)

3 **References/limit:** 11/40

4  
5  
6 **Short title:** Dysport for treatment of cervical dystonia

7  
8  
9 **Clinical trials information:** (NCT00447772; clinicaltrials.gov)

10  
11  
12 **Key words (limit of 5):** *de novo* cervical dystonia, quality of life, pain, Dysport, abobotulinumtoxinA

13  
14  
15  
16  
17  
18  
19  
20  
21  
22  
23  
24  
25  
26  
27  
28  
29  
30  
31  
32  
33  
34  
35  
36  
37  
38  
39  
40  
41  
42  
43  
44  
45  
46  
47  
48  
49  
50  
51  
52  
53  
54  
55  
56  
57  
58  
59  
60

For peer review only

**Abstract**

**Objectives:** It remains to be determined whether the benefits of botulinum toxin type A (BoNT-A) on cervical dystonia (CD) motor symptoms extend to improvements in patient quality of life (QoL). This analysis of a large, multicentre study was conducted with the aim of investigating changes in QoL and functioning among *de novo* patients receiving 500 U BoNT-A (abobotulinumtoxinA; Dysport®) for the treatment of the two most frequent forms of cervical dystonia (CD), predominantly torticollis and laterocollis.

**Design:** Prospective, open-label study of Dysport (500 U; Ipsen Biopharm Ltd) administered according to a defined intramuscular injection algorithm.

**Setting:** German and Austrian outpatient clinics.

**Participants:** 516 male and female patients (aged  $\geq 18$  years) with *de novo* CD. The majority of patients had torticollis (78.1%). Thirty-five patients had concomitant depression (MedDRA-defined).

**Main outcome measures:** Change from baseline to Week 4 and Week 12 in Craniocervical Dystonia Questionnaire (CDQ-24) total and subscale scores, patient diary items ('day-to-day capacities and activities', 'pain', and 'duration of pain'), and global assessment of pain.

**Results:** Significant improvements were observed in CDQ-24 total and subscale scores at Week 4 and were sustained up to Week 12 ( $p < 0.001$ ). Changes in CDQ-24 scores did not significantly differ between the torticollis and laterocollis groups or between patients with or without depression. There were also significant reductions in patient diary item scores for activities of daily living, pain and pain duration at Weeks 4 and 12 ( $p < 0.001$ ). Pain relief (less or no pain) was reported by 66.0% and 74.1% of patients at Week 4 and Week 12, respectively. Changes in pain parameters demonstrated a positive relationship with change in Tsui score.

**Conclusions:** Standardized open-label treatment with Dysport 500 U leads to improvements in QoL and pain intensity up to 12 weeks in patients with CD.



## Article summary

### Article focus:

- To test the hypothesis whether a modification of clinical symptoms is correlated to quality of life (QoL) parameters after treatment with botulinum toxin type A (BoNT-A)
- Investigation of the QoL and pain reduction benefits of Dysport when administered for the *de novo* management of torticollis and laterocollis in a large cervical dystonia (CD) patient population

### Key messages:

- Dysport 500 U significantly improves QoL, as rated by CDQ-24, in *de novo* patients with heterogeneous forms of CD
- Dysport 500 U treatment leads to significant reductions in pain (on several outcome measures) in *de novo* patients with heterogeneous forms of CD

### Strengths and limitations of this study:

- This is the largest prospective, open-label cohort study of QoL in CD patients to date
- This study reflects the short-term effects of Dysport arising from a single 500 U administration; therefore, long-term studies are required to determine whether the observed beneficial effects on symptoms and QoL can be sustained with repeated treatment.

## INTRODUCTION

Cervical dystonia (CD), the most frequent form of focal dystonia, may present as idiopathic or secondary disease.[1] Idiopathic CDs are characterised by abnormal, involuntary muscle contractions, resulting in abnormal head movements and various undesired positions of the head.[2] The disorder is commonly classified as a function of the direction of abnormal head position – torticollis (turning of the head), laterocollis (head tilt), retrocollis (neck extension), antecollis (flexion), or, most frequently, a combination of the above.[3] Increased involuntary activity in affected muscles frequently leads to hypertrophy, and resulting symptoms include pain in the region of the neck and shoulder, decreased range of motion, and impairment of voluntary movement of the head. Reduction of muscle activity with local botulinum toxin type A (BoNT-A) injections is recommended as the first-line treatment option for CD.[4] The efficacy and tolerability of abobotulinumtoxinA (Dysport®, Ipsen Biopharm Ltd.) and other BoNT-A preparations for the treatment of CD has been demonstrated in randomised, placebo-controlled trials and open-label extension studies, with symptom relief being sustained for up to 3 months or 4 treatment cycles, respectively.[4-8]

Clinical symptoms of CD (for example, neck pain) cause significant disability that interferes with patients' daily functioning, such as the ability to remain in employment.[9] Moreover, a significant negative impact on quality of life (QoL) is seen with CD and is comparable to that seen with other serious disabling illnesses, such as multiple sclerosis, Parkinson's disease and stroke.[10] In a study of 289 patients with CD from seven European countries, concomitant depression was identified as one of the two strongest predictors of poor QoL (alongside anxiety), in addition to response to botulinum toxin, self-deprecation, stigma, and other patient-related factors.[11] Successful treatment of motor symptoms by existing treatments does not necessarily entail a positive influence on patient QoL.[12] It is, therefore, important to analyse whether clinically effective treatment of the movement disorder also leads to improvements in social and emotional wellbeing for patients and a positive impact on their daily functions and activities.

A large, prospective, open, multicentre study was conducted to evaluate the effectiveness and safety of a single dose of Dysport (500 U) for the treatment of the two most frequent forms of CD.[13] Treatment was given according to a standardised algorithm based on the two most frequent forms of CD, predominantly torticollis and laterocollis. Evaluated over 12 weeks, CD symptom severity was assessed using an established scale (the Tsui scale), with the patient in a standardised seated position.[14] Results from the study showed that Dysport was effective and well tolerated for the *de novo* management of a range of heterogeneous forms of CD, when using a standardised regimen that allows tailored dosing based on individual symptom assessment.[13] QoL parameters were assessed as secondary objectives throughout the study using a patient disease questionnaire (Cranio-cervical Dystonia Questionnaire; CDQ-24)[15] and patient diaries.

1 Here, we present results of the QoL objectives, which aimed to determine the effects of treatment  
2 with Dysport 500 U on patient QoL, and everyday functions and activities. Pain may exert an  
3 influence on the patient's rating of the efficacy of BoNT-A therapy, which is not taken into account  
4 using the Tsui score. Consequently, pain was additionally evaluated using the above-mentioned  
5 measures.  
6  
7  
8  
9  
10  
11  
12  
13  
14  
15  
16  
17  
18  
19  
20  
21  
22  
23  
24  
25  
26  
27  
28  
29  
30  
31  
32  
33  
34  
35  
36  
37  
38  
39  
40  
41  
42  
43  
44  
45  
46  
47  
48  
49  
50  
51  
52  
53  
54  
55  
56  
57  
58  
59  
60

## METHODS

### Study design, patients and treatment

This was a **non-controlled**, prospective, multicentre, open-label study conducted in Germany and Austria to investigate the comparable effectiveness and safety of 500 U Dysport for the treatment of patients (aged  $\geq 18$  years) with heterogeneous forms of CD, naïve to BoNT-A. Full details of study design, and inclusion and exclusion criteria, have been published previously **by Hefter et al. and are available through BMJ Open**.<sup>[13]</sup>

All patients received a single intramuscular injection with 500 U Dysport, diluted in 2.5 mL 0.9% NaCl. Full details of the standardised injection protocol based on the symptoms assessed with the Tsui score have also been published previously.<sup>[13]</sup>

### Assessments

The severity of CD was assessed **by the investigating physicians** at Visit 1 (Week 0; baseline), Visit 2 (Week 4) and Visit 3 (Week 12) using the Tsui rating scale total score under standardised conditions, with the patient in a relaxed seated position. The primary efficacy outcome measure was the change from baseline to Week 4 in total Tsui score after treatment.<sup>[13]</sup>

### CDQ-24

The effects of treatment on QoL, pain and any restrictions of possible everyday functions and activities of the patient were assessed in comparison to baseline values using the validated CDQ-24.<sup>[15]</sup> The CDQ-24 is a disease-specific QoL instrument designed to investigate problems in daily living skills related to CD, and comprises 24 items within five domains related to stigma (questions 7, 8, 9, 10, 18, 22); emotional wellbeing (questions 11, 12, 13, 14, 15); pain (questions 4, 5, 21); activities of daily living (questions 1, 2, 3, 6, 19, 20); and social/family life (questions 16, 17, 23, 24). Scores for each item range from 0 to 4, representing increasing severity of impairment. In order to obtain scores for the individual subscales, the total score of each subscale (sum of the individual item scores) was transformed linearly to a 0 to 100 scale, where a score of 0 indicates the best and a score of 100 the worst possible QoL (which explains why some subscores, e.g. stigma, have higher values than the total score). Assessment of the CDQ-24 was conducted at baseline (Visit 1), Week 4 (Visit 2) and Week 12 (Visit 3).

### Patient diary

Patients were provided with a diary, which was used to self-record weekly ratings (on an 11-point visual analogue scale; VAS) for items related to 'Day-to-day capacities and activities' (0 = not affected, 10 = very severely affected), 'Pain' (0 = no pain, 10 = strongest imaginable pain) and 'Duration of pain' (0 = never pain, 10 = constant pain). Assessment of the patient diary was conducted at baseline (Visit 1), Week 4 (Visit 2) and Week 12 (Visit 3).

### *Global assessment of pain*

At Visits 2 and 3, patients were required to assess change of pain associated with CD according to the following response categories: 1 = no pain (anymore); 2 = less pain; 3 = no change; 4 = more pain.

### **Statistical analyses**

All efficacy and QoL assessments were conducted in the intent-to-treat (ITT) population (i.e. all patients of the safety population with a baseline [Visit 1, Week 0] and a post-baseline [Visit 2, Week 4 or Visit 3, Week 12] assessment of the Tsui rating scale).

Time course was analysed over Visits 1, 2 and 3 or Week 0, 4, 12, respectively, of CDQ-24 subscale 'pain', diary item 'pain', global assessment of pain (at Visits 2 and 3) and CDQ-24 total score for patients with valid data for all three pain assessments at all visits.

Inferential analyses of CDQ-24 total score and subscale changes from baseline at Visits 2 and 3 were conducted for the total population and by main type of CD. Descriptive and inferential analyses of diary item changes from baseline at Weeks 4 and 12 were performed for the total population and by main type of CD. Descriptive analyses of standardized pain measures (global assessment of pain by patient at Visits 2 and 3; CDQ-24 'pain' change from baseline at Visits 2 and 3; diary items 'pain' and 'pain duration' changes from baseline at Weeks 4 and 12) were assessed by main type of CD. All pain statements were documented differently; in order to allow comparisons between the different assessments, all pain measures were converted to a common scale using the following categories for change from baseline: *less or no pain; no change; or more pain*.

Pearson correlation analyses were performed of total Tsui score change from baseline at Visit 2 and diary items 'pain' and 'pain duration' changes from baseline at Week 4, and CDQ-24 subscale 'pain' change from baseline at Week 4. In addition, Pearson correlation analyses were performed between CDQ-24 total score and subscale score changes from baseline and changes from baseline for items of the patient diary.

Additional *post-hoc* analyses were carried out to investigate the impact of concomitant depression on treatment effectiveness and QoL.

## RESULTS

### Patient disposition and demographics

Baseline demographic, safety and tolerability data for all patients are available in the 2011 BMJ Open article by Hefter et al.[13] Of the 516 patients enrolled in the study, safety data were available for all but one patient (safety population: n=515). At least one adverse event was experienced by 213 (41.4%) of patients, of which 155 (30.1%) were considered to be related to study medication. Data of the Tsui rating scale at baseline (visit 1) and at least one post-baseline visit (visit 2 or 3) were available in 503 patients (ITT population). Overall, 26 patients discontinued the study prematurely, with the main reasons cited as insufficient compliance and lost to follow-up.

The majority of patients had torticollis (n=402; 78.1%; 112 patients [21.7%] had laterocollis; type of CD was unknown in one patient). Baseline characteristics were generally similar between patients with torticollis and laterocollis, as shown by Hefter et al. (2011).[13] The proportion of patients with tremor was similar in both torticollis (36.1%) and laterocollis (36.6%) groups. However, approximately half of the laterocollis patients (47.3%) were affected by shoulder elevation compared with only one-third of torticollis patients (31.3%). The majority of patients in the total population (56.5%) were affected by pain (torticollis: 54.5%; laterocollis: 64.3%).

Mean CDQ-24 total score at baseline for the overall patient population was 39.6 ( $\pm 18.8$  [39.8 for ITT population]). Baseline mean CDQ-24 total scores did not differ markedly between the main CD types: torticollis (39.9) and laterocollis (38.8).

After analysis of the study data, 35 patients were identified with depression as concomitant disease, according to the preferred MedDRA term (6.8% of the total population). The Tsui score at baseline was comparable between patients with (n=34) and without (n=469) depression (8.6 and 8.4, respectively), as well as the decrease in Tsui score at Week 4 minus baseline ( $-4.0$  and  $-3.8$ , respectively).

### Treatments and dosing

All treated patients received Dysport 500 U at baseline, with the exception of three patients who received 360, 400 and 460 U. The most frequently reported concomitant medications (>10% of patients) by therapeutic class were beta-blocking agents (19.0%), agents acting on the renin-angiotensin system (14.4%), psychoanaleptics (13.6%), thyroid therapy (13.0%) and analgesics (10.1%). Use of concomitant medication was similar across CD subtypes.

### CDQ-24

In the total patient population, treatment with Dysport was associated with a statistically significant improvement in the CDQ-24 total score from baseline at Week 4 (decrease of 11.1 points [95%

1 confidence interval (CI)  $-12.5, -9.6$ ]; mean score: 28.7), which was maintained up to Week 12  
2 (decrease of 11.8 points [95% CI  $-13.1, -10.4$ ]; mean score: 28.0) (Figure 1,  $p < 0.001$  at Week 4  
3 and Week 12 vs. baseline).  
4  
5

6  
7  
8 At Week 4 and Week 12, Dysport treatment significantly improved all CDQ-24 subscale scores  
9 from baseline (Figure 1,  $p < 0.001$ ). Patient-rated QoL at baseline was highest (worst) for subscale  
10 'stigma' (mean score: 50.4) and lowest (best) for social/family life (mean score: 21.9). Accordingly,  
11 mean changes from baseline (at Week 4 and Week 12) were highest for subscale 'stigma' ( $-16.8$   
12 [95% CI  $-19.0, -14.7$ ] and  $-16.4$  [95% CI  $-18.4, -14.3$ ], respectively) and lowest for subscale  
13 'social/family life' ( $-5.6$  [95% CI  $-7.2, -4.0$ ] and  $-6.7$  [95% CI  $-8.3, -5.1$ ], respectively). For all  
14 subscales, except 'stigma', continued improvement was seen from Week 4 through to Week 12.  
15 **The small worsening in 'stigma' seems marginal when compared with the improvements seen in  
16 other categories, but correlates with an increasing Tsui score between Week 4 and Week 12.**  
17  
18  
19  
20  
21  
22

23 There were no statistically significant differences in QoL results between the torticollis and  
24 laterocollis groups (for total score and subscores).  
25  
26

27  
28 Higher CDQ-24 total scores were recorded for the subgroup of patients with depression, with mean  
29 scores at Visit 1 (baseline), Visit 2 and Visit 3 of 51.8, 41.7 and 38.5, respectively, compared with  
30 38.9, 27.8 and 27.2, respectively, for those without depression. However, the changes in CDQ-24  
31 total score from baseline to Week 4 and Week 12 were comparable between patients with and  
32 without depression. The difference between patients with and without depression was most  
33 apparent for the CDQ-24 subscale 'emotional wellbeing' at Visit 1, 2, and 3: mean scores of 57.5,  
34 47.4 and 43.8, respectively, for patients with depression, and 38.0, 27.7 and 26.7, respectively, for  
35 those without depression. No differences were observed for CDQ-24 total scores between the  
36 torticollis and laterocollis groups of patients with depression. However, a noticeably smaller change  
37 from baseline to Visit 2 was seen in the depressed laterocollis subgroup for 'emotional wellbeing'  
38 ( $-4.5$ ) when compared with the depressed torticollis subgroup ( $-12.5$ ).  
39  
40  
41  
42  
43  
44  
45

#### 46 **Patient diary**

47 Similar to the results for CDQ-24, patients' diaries reflected positive treatment effects of Dysport on  
48 the VAS-assessed activities of daily living, pain and pain duration (mean  $\pm$  standard deviation  
49 [ $\pm$ SD] baseline values  $5.3 \pm 2.8$ ,  $4.1 \pm 3.0$  and  $4.7 \pm 3.4$  points, respectively). As shown in Figure 2,  
50 for the total population, 'Pain', 'Pain duration' and 'Day-to-day functions and activities' significantly  
51 improved at Week 4 and Week 12 versus baseline ( $p < 0.001$ ). For 'Pain' and 'Pain duration', there  
52 was further mild improvement from Week 4 to Week 12.  
53  
54  
55  
56  
57  
58  
59  
60

1 Descriptive and t-test statistical analyses of diary item changes of the CD subgroups (torticollis and  
2 laterocollis) from baseline to Week 4 and Week 12 showed that all changes were statistically  
3 significant ( $p < 0.05$ ), with the exception of change of 'Day-to-day functions and activities' of  
4 laterocollis patients between baseline and Week 12 ( $p = 0.0531$ ). There were no other statistically  
5 significant differences in patient diary results in the torticollis and laterocollis subgroups.  
6  
7  
8  
9

### 10 **Global assessment of pain**

11 Most patients judged pain relief higher at Week 12 than at Week 4. Pain relief (less or no pain) was  
12 perceived by 330 patients (66.0%) at Week 4 and by 363 patients (74.1%) at Week 12 (no change:  
13 16.4% at Week 4 and 16.9% at Week 12; more pain: 17.6% at Week 4 and 9.0% at Week 12).  
14  
15  
16  
17

### 18 **Results of correlation analyses**

#### 19 *CDQ-24 and Tsui score*

20 Total CDQ-24 and all CDQ-24 subscores correlated significantly at baseline with Tsui score  
21 ( $p < 0.001$ ), with a correlation coefficient (R) varying between 0.17 and 0.27. Comparing the time  
22 course of Tsui score and QoL, the positive trend of the CDQ-24 total score at Week 4 (24%  
23 improvement) continued up to Week 12 (27.5% improvement), although the Tsui total score  
24 deteriorated between Week 4 (44.3% improvement) and Week 12 (24.3% improvement) in all  
25 patients (Figure 3). Nevertheless, statistically significant correlations ( $p < 0.001$ ) were seen between  
26 changes from baseline to Visits 2 (Figure 4) and 3 in total CDQ-24 score and in Tsui total score,  
27 but the correlation at Week 4 was slightly higher ( $R = 0.26$ ) than at Week 12 ( $R = 0.24$ ). Correlations  
28 ( $R < 0.3$ ) were also seen between changes from baseline to Visits 2 and 3 in individual CDQ-24  
29 subscale scores and in Tsui total score, which were statistically significant ( $p < 0.001$ ) for 'stigma',  
30 'emotional wellbeing', 'pain' and 'activities of daily living'. For social/family life, the correlation was  
31 significant at Week 4 ( $p < 0.01$ ) but not at Week 12 ( $p = 0.054$ ).  
32  
33  
34  
35  
36  
37  
38  
39  
40  
41

#### 42 *Pain and Tsui score*

43 A correlation was found between the global pain assessment and the Tsui score for the total  
44 population: patients with an assessment of 'less pain' had a higher decrease in mean Tsui score at  
45 Week 4 (-4.5) than patients with 'no change in pain' (-3.0) and patients with 'more pain' (-3.2),  
46 respectively. The highest decrease in mean Tsui score (Visit 2 vs. baseline: -4.9) was achieved by  
47 patients in the laterocollis group in which 64.3% of the patients had reported pain at baseline vs.  
48 54.5% in the torticollis group.  
49  
50  
51  
52  
53

#### 54 *Global assessment of pain, CDQ-24 subscale pain and patient diary pain*

55 Overall, a significant positive relationship ( $p < 0.001$ ) was seen between all pain parameters (i.e.  
56 CDQ-24, patient diary and global assessment of pain), with the CDQ subscale pain and the diary  
57 item of 'pain duration' showing the lowest correlation ( $R = 0.36$ ). The correlation between patient  
58  
59  
60



1  
2 global assessment of pain and the pain intensity in the patient diary resulted in a much higher  
3 correlation coefficient ( $R=0.46$ ).  
4

5  
6 The percentage of patients reporting a global improvement of pain at Week 4 (66.0%) was higher  
7 than the percentage of patients documenting a pain improvement in their diaries (50.2–52.3%). At  
8 Week 12, the discrepancy was even higher between global improvement of pain (74.1%) and the  
9 percentage of patients documenting pain improvement in their diaries at this time point (48.3–  
10 55.2%).  
11

12  
13  
14 *CDQ-24 activities of daily living and patient diary daily activities*

15 Comparing all CDQ subscales with the patient diary, the highest correlations in the total population  
16 (and for both CD types) were observed between the patient diary item of 'Day-to-day function' and  
17 the CDQ-24 subscale of 'Activities of daily living' and 'Stigma', with  $R=0.48$  and  $0.37$  (for total  
18 population), respectively, at Week 4, and  $R=0.43$  and  $0.38$  (for total population), respectively, at  
19 Week 12 ( $p<0.001$ ).  
20  
21  
22  
23  
24  
25  
26  
27  
28  
29  
30  
31  
32  
33  
34  
35  
36  
37  
38  
39  
40  
41  
42  
43  
44  
45  
46  
47  
48  
49  
50  
51  
52  
53  
54  
55  
56  
57  
58  
59  
60

## DISCUSSION

The results from this study, the largest published, prospective, open-label cohort study of *de novo* patients with CD to date, demonstrate that a single dose of 500 U Dysport leads to an improvement in disease-related impairment of QoL, as assessed by CDQ-24. Notably, the CDQ-24 results in Week 12 were better than those recorded in Week 4, despite an increase (worsening) of Tsui score (Figure 3), suggesting that improvements in QoL are maintained for a clinically significant duration. Our findings imply that the positive effects of BONT-A following treatment are encouraging to patients and helps them to gain perspective on their condition. Improvement of QoL seems to be better at Week 12, just before the second injection, compared to Week 4 when the injection has its maximal effect. This aspect and the weak correlation between improvement in CDQ-24 and Tsui underscore the involvement of additional factors beyond abnormal head posture in influencing QoL in CD. We believe that patients appreciate improvements in their condition relative to baseline and that severity of CD can systematically be reduced by repetitive injections every 3 months. This perspective potentially accounts for better scores at Week 12 compared to Week 4. Additionally, greater improvement at Week 12 compared with Week 4 may reflect the ability of the CDQ-24 to capture longer-term changes in QoL.[15]

Improvement of QoL items linked to abnormal head posture, such as stigma, did however follow the temporal course of head position, with worse scores at Week 12 than at Week 4. This is in contrast to the other subscales of the CDQ-24, which all showed continued improvement. Stigma is associated with the worst baseline CDQ-24 subscale score for all patients. The appearance of patients can be seriously affected by involuntary movements seen in CD and self-perceived stigma can be a major source of disability.[11, 16] Indeed, results from the present study show that stigma is seemingly important for the everyday function of patients, with a positive correlation being observed between the CDQ-24 subscale 'Stigma' and the diary item of 'Day-to-day functions and activities'.

Pain is another important factor influencing QoL. Interestingly, better improvements in pain were recorded when the clinician was present for the assessment (global assessment of pain) than rated by the patients using their diaries at home. Regardless, systematic improvement of pain, not only of pain intensity but also of pain duration, were reported by all assessments. In general, an improvement of Tsui score correlated positively with an improvement of pain in this study, with patients recording less pain on the global pain assessment achieving the greatest reduction in Tsui total score.

In this study, patients with depression as concomitant disease showed worse QoL scores at baseline. Importantly, following Dysport treatment, patients with depression experienced similar

1 benefits to those without depression, as demonstrated by similar changes from baseline at Week 4  
2 and Week 12 for the Tsui score, and for QoL between the depressed and non-depressed  
3 subgroups. The ability of BONT-A treatment to improve QoL in the presence of concomitant  
4 depression is particularly pertinent in view of published observations highlighting the role of  
5 depression as a key determinant of poor QoL in patients with CD.[11]  
6  
7  
8  
9

10 Although laterocollis patients responded well according to Tsui score, pain appeared to be more  
11 common in this patient group than in patients with torticollis. The higher proportion of shoulder  
12 elevation in laterocollis patients may be one possible explanation for the increased rate of  
13 documented pain in these patients. As presented previously,[13] improvements in CD symptoms  
14 were confirmed by investigator and patient global assessment of symptoms without distinct  
15 (significant) group differences, although laterocollis patients experienced more frequent severe  
16 muscle weakness as an adverse event than torticollis patients (8.9% laterocollis, n=10 vs. 1.7%  
17 torticollis, n=7). Investigator and patient ratings of tolerability also varied most in the laterocollis  
18 group at Week 4, which could probably be explained by the higher rate of severe muscular  
19 weakness reported in these patients.[13] Although torticollis and laterocollis patients showed the  
20 same clinical response in the Tsui score, there are obviously differences between the two groups  
21 in disease perception. More analyses of the available study data including side effects, such as  
22 muscular weakness, may help to understand these apparent inconsistencies. Moreover, further  
23 studies may clarify if this was a random effect or if these patients would benefit from longer  
24 treatment duration with Dysport. Finally, the specific head position, i.e. whether the head is tilted or  
25 rotated, does not seem to play an essential role in emotional and social wellbeing; patients with  
26 either torticollis or laterocollis demonstrated comparable results in the CDQ-24 subscale 'emotional  
27 wellbeing' at baseline.  
28  
29  
30  
31  
32  
33  
34  
35  
36  
37  
38  
39

40 The results from this study support those from a published study by Ben-Shlomo *et al.*, which  
41 demonstrated that, in addition to disease severity, QoL in patients with CD is predominantly  
42 determined by factors such as self-esteem, self-deprecation, stigma and depression.[11]  
43 Consequently, the care of these patients should not only focus on the reduction of CD symptom  
44 severity, but also on the improvement of the patient's psychological wellbeing. The use of  
45 pharmacological treatments with the ability to reduce disease severity has been shown to have a  
46 major benefit on both the physical and mental wellbeing of CD patients.[11] Recent controlled  
47 studies, for example,[17] have shown that short-term treatment with a combination of  
48 pharmacological therapy (BoNT-A) and a physical treatment programme (comprising self-control  
49 techniques and counselling) may be more effective than a sole pharmacological intervention.  
50 Therefore, further studies investigating the long-term effects of pure pharmacological and  
51 multidimensional treatment programmes on QoL are warranted.  
52  
53  
54  
55  
56  
57  
58  
59  
60

1 In conclusion, CD is a disabling and often painful illness that interferes with activities of daily living.  
2  
3 As a result, CD has a significant adverse impact on patient's physical and mental wellbeing and  
4  
5 QoL. Results from this large, prospective, open-label study support the ability of Dysport 500 U to  
6  
7 provide sustained efficacy in reducing motor symptoms coincident with significant improvements in  
8  
9 pain and QoL among patients with CD, and provide the foundation for further investigation in  
10  
11 randomised, controlled studies.

### 12 **Acknowledgements**

13  
14 This study was supported by Ipsen Pharma GmbH, Germany. Data management and statistical  
15  
16 analyses were performed by GKM Gesellschaft für Therapieforschung in Munich, Germany.  
17  
18 Editorial assistance for the preparation of this manuscript was provided by Ogilvy Healthworld  
19  
20 Medical Education; funding was provided by Ipsen Pharma GmbH. The authors would like to thank  
21  
22 Christiane Colling, PhD, Medical Project Manager, Ipsen Pharma GmbH, for her assistance in the  
23  
24 conduct of the study and for review of the manuscript.

### 25 **Competing interests (this article)**

26 No competing interests. HH was the coordinating investigator of this study.  
27  
28

### 29 **Competing interests (previous 12 months)**

30 All authors are consultants for Ipsen.  
31  
32

### 33 **Funding**

34 Funding was provided by Ipsen Pharma GmbH.  
35  
36  
37

### 38 **Author contributions:**

39 All authors were involved in the concept and study design, study conduct, data collection, analysis  
40  
41 and interpretation, manuscript writing, review and critique. All authors approved the final  
42  
43 manuscript.  
44  
45  
46  
47  
48  
49  
50  
51  
52  
53  
54  
55  
56  
57  
58  
59  
60

1  
2 **Figure 1:** Change in CDQ-24 total and subscale scores from baseline to Weeks 4 and 12 (ITT:  
3 total population).

4  
5 Total score and all subscores differed significantly from baseline to Week 4 and Week 12 ( $p < 0.001$   
6 at Week 4 and Week 12 vs. baseline).

7 ITT, intent-to-treat.

8 \*Change from baseline score was worse at Week 12 vs. Week 4.

9  
10  
11 **Figure 2:** Change in patient diary visual analogue score (VAS) from baseline to Weeks 4 and 12  
12 (ITT: total population).

13  
14 t-test analysis:  $p < 0.001$  at Week 4 and Week 12 vs. baseline.

15 ITT, intent-to-treat.

16 \*Change from baseline score was worse at Week 12 vs. Week 4.

17  
18  
19 **Figure 3:** Time course of change in total Tsui score and total CDQ24 score.

20  
21  
22 TSUI-Score: Week 4,  $n = 503$  patients; Week 12,  $n = 490$  patients.

23 CDQ-24: Week 4,  $n = 483$  patients; Week 12,  $n = 473$  patients.

24  
25  
26  
27 **Figure 4:** Correlation between change in CDQ-24 total score and change in total Tsui score from  
28 baseline to Week 4.

29  
30 Display of raw data; one dot may represent more than one patient.

31 Correlation coefficient: 0.26,  $p < 0.001$ ,  $n = 484$ .

32 (Week 12: Correlation coefficient: 0.24,  $p < 0.001$ ,  $n = 474$ ).

## References

1. Crowner BE. Cervical dystonia: disease profile and clinical management. *Phys Ther* 2007;**87**:1511-26.
2. Van Zandijcke M. Cervical dystonia (spasmodic torticollis). Some aspects of the natural history. *Acta Neurol Belg* 1995;**95**:210-5.
3. Velickovic M, Benabou R and Brin MF. Cervical dystonia pathophysiology and treatment options. *Drugs* 2001;**61**:1921-43.
4. Simpson DM, Blitzer A, Brashear A *et al*. Assessment: Botulinum neurotoxin for the treatment of movement disorders (an evidence-based review): report of the Therapeutics and Technology Assessment Subcommittee of the American Academy of Neurology. *Neurology* 2008;**70**:1699-706.
5. Poewe W, Deuschl G, Nebe A *et al*. What is the optimal dose of botulinum toxin A in the treatment of cervical dystonia? Results of a double blind, placebo controlled, dose ranging study using Dysport. German Dystonia Study Group. *J Neurol Neurosurg Psychiatry* 1998;**64**:13-7.
6. Wissel J, Kanovsky P, Ruzicka E *et al*. Efficacy and safety of a standardised 500 unit dose of Dysport (clostridium botulinum toxin type A haemagglutinin complex) in a heterogeneous cervical dystonia population: results of a prospective, multicentre, randomised, double-blind, placebo-controlled, parallel group study. *J Neurol* 2001;**248**:1073-8.
7. Truong D, Duane DD, Jankovic J *et al*. Efficacy and safety of botulinum type A toxin (Dysport) in cervical dystonia: results of the first US randomized, double-blind, placebo-controlled study. *Mov Disord* 2005;**20**:783-91.
8. Truong D, Lew MF and al. e. Long-term efficacy and safety of botulinum toxin type A (Dysport) in cervical dystonia. *Parkinsonism Relat Disord* Submitted;
9. Molho ES, Agarwal N, Regan K *et al*. Effect of cervical dystonia on employment: A retrospective analysis of the ability of treatment to restore premorbid employment status. *Mov Disord* 2009;**24**:1384-7.
10. Camfield LB-S, Y. Warner, T.T. Epidemiological Study of Dystonia in Europe Collaborative Group Impact of cervical dystonia on quality of life. *Mov Disord* 2002;**17**:838-41.
11. Ben-Shlomo Y, Camfield L and Warner T. What are the determinants of quality of life in people with cervical dystonia? *J Neurol Neurosurg Psychiatry* 2002;**72**:608-14.
12. Muller J, Kemmler G, Wissel J *et al*. The impact of blepharospasm and cervical dystonia on health-related quality of life and depression. *J Neurol* 2002;**249**:842-6.
13. Hefter H, Kupsch A, Müngersdorf M *et al*. A Botulinum Toxin A Treatment Algorithm for De Novo Management of Torticollis and Laterocollis. *BMJ Open* 2011;1:e000196. doi:10.1136/bmjopen-2011-000196
14. Tsui JK, Eisen A, Stoessl AJ *et al*. Double-blind study of botulinum toxin in spasmodic torticollis. *Lancet* 1986;**2**:245-7.
15. Muller J, Wissel J, Kemmler G *et al*. Craniocervical dystonia questionnaire (CDQ-24): development and validation of a disease-specific quality of life instrument. *J Neurol Neurosurg Psychiatry* 2004;**75**:749-53.
16. Rinnerthaler M, Mueller J, Weichbold V *et al*. Social stigmatization in patients with cranial and cervical dystonia. *Mov Disord* 2006;**21**:1636-40.

- 1  
2  
3  
4  
5  
6  
7  
8  
9  
10  
11  
12  
13  
14  
15  
16  
17  
18  
19  
20  
21  
22  
23  
24  
25  
26  
27  
28  
29  
30  
31  
32  
33  
34  
35  
36  
37  
38  
39  
40  
41  
42  
43  
44  
45  
46  
47  
48  
49  
50  
51  
52  
53  
54  
55  
56  
57  
58  
59  
60
17. Tassorelli C, Mancini F, Balloni L *et al*. Botulinum toxin and neuromotor rehabilitation: An integrated approach to idiopathic cervical dystonia. *Mov Disord* 2006;**21**:2240-3.

For peer review only

1  
2  
3  
4  
5  
6  
7  
8  
9  
10  
11  
12  
13  
14  
15  
16  
17  
18  
19  
20  
21  
22  
23  
24  
25  
26  
27  
28  
29  
30  
31  
32  
33  
34  
35  
36  
37  
38  
39  
40  
41  
42  
43

Stigma\*

Emotional wellbeing

Pain

Activities of daily living

Social/family life

Total score

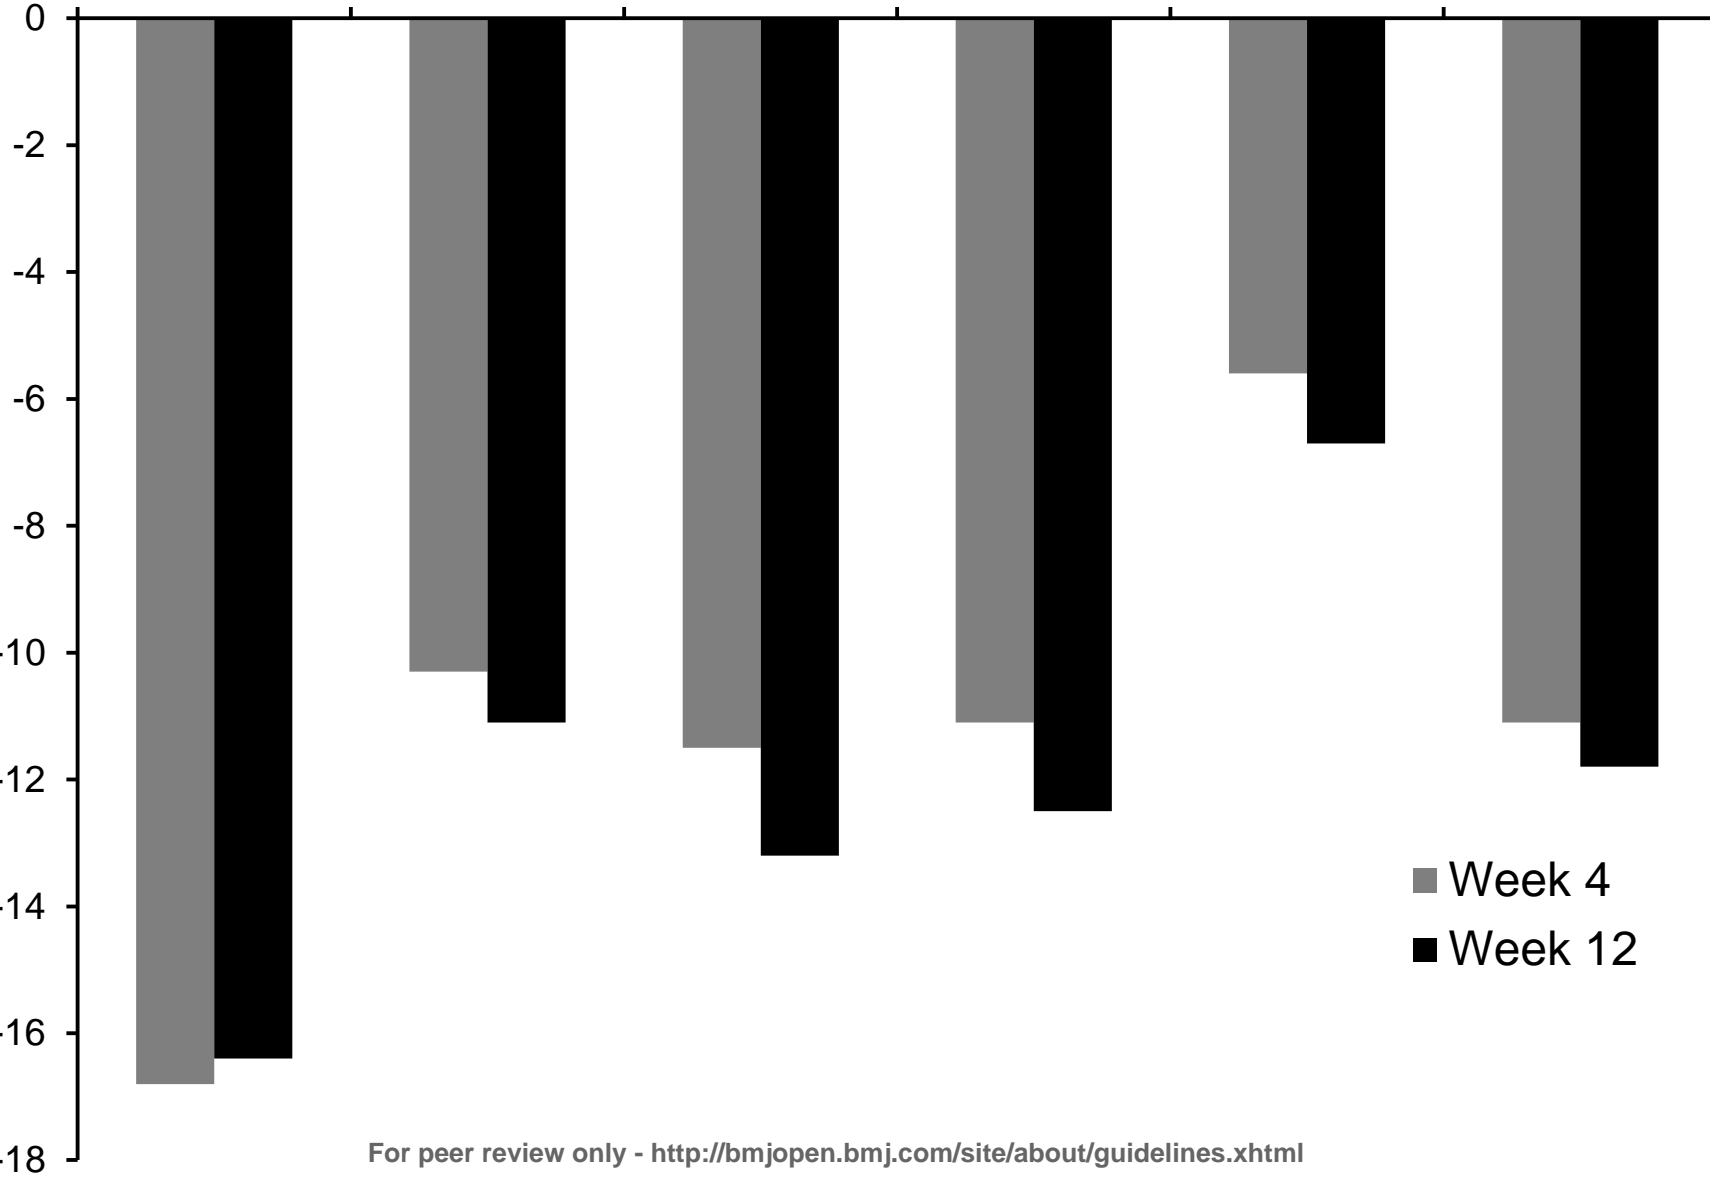



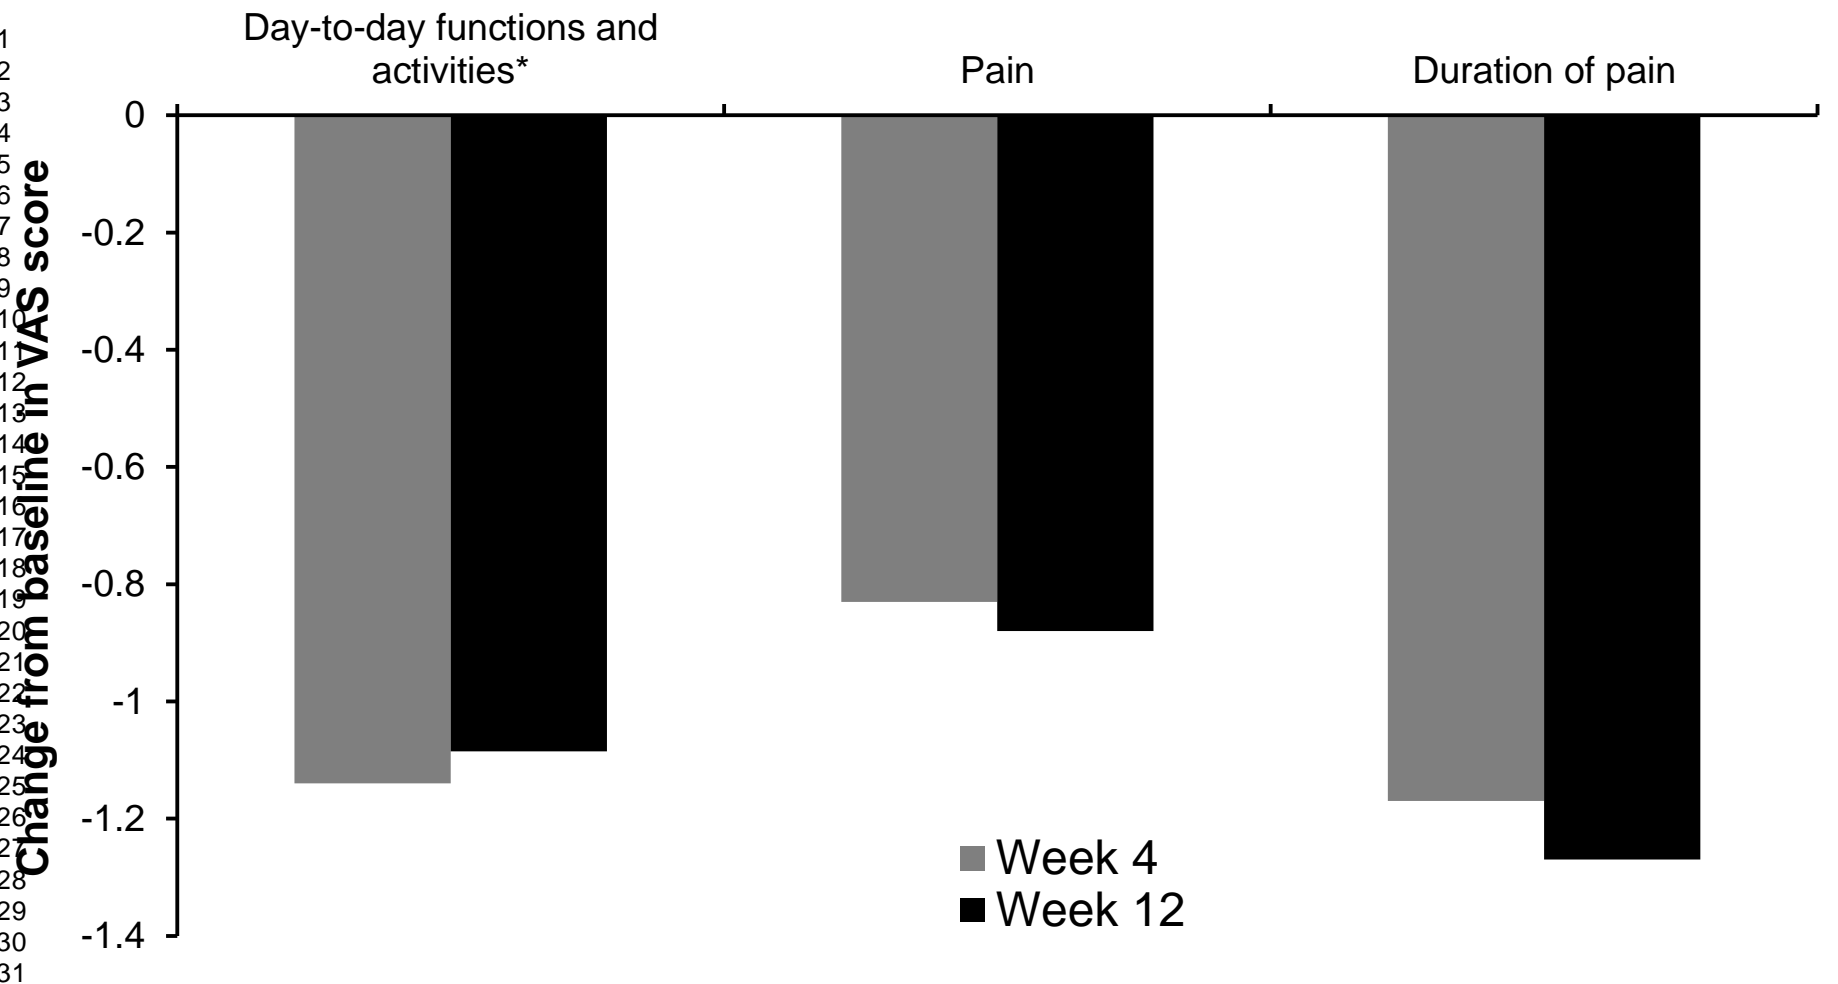

Day-to-day functions and activities\*

Pain

Duration of pain

Change from baseline in VAS score

Week 4  
Week 12

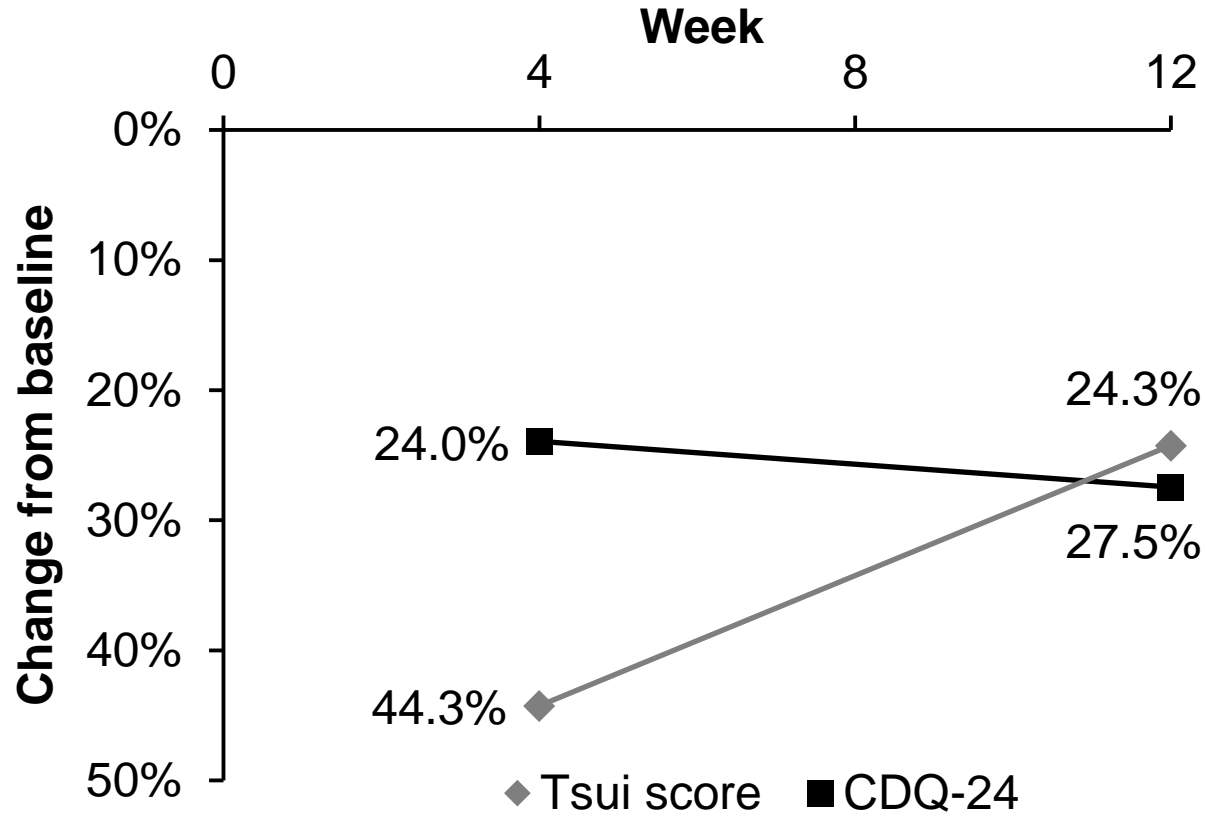

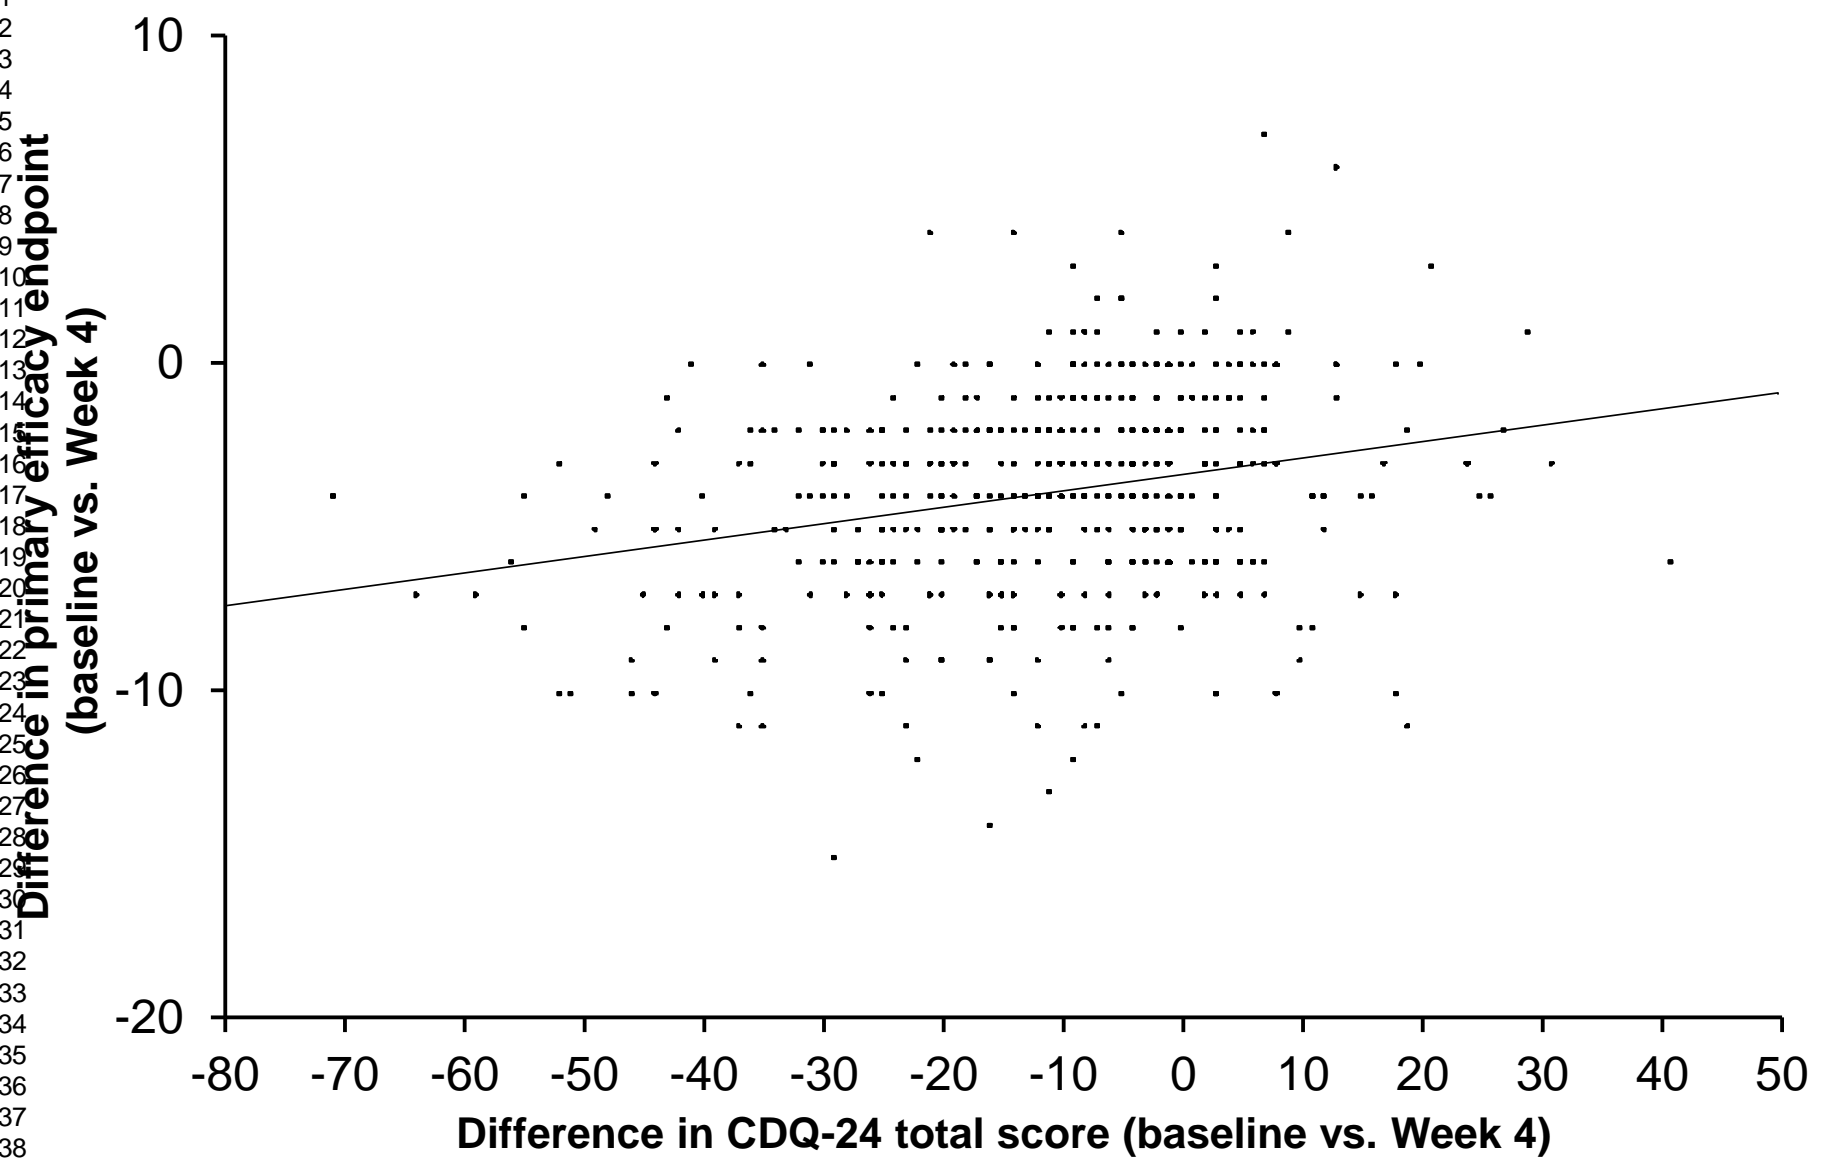



**An open-label cohort study of the improvement of quality of life and pain in de novo cervical dystonia patients after injections with 500 U botulinum toxin A (Dysport®)**

|                                 |                                                                                                                                                                                                                                                                                                                                                                         |
|---------------------------------|-------------------------------------------------------------------------------------------------------------------------------------------------------------------------------------------------------------------------------------------------------------------------------------------------------------------------------------------------------------------------|
| Journal:                        | <i>BMJ Open</i>                                                                                                                                                                                                                                                                                                                                                         |
| Manuscript ID:                  | bmjopen-2012-001853.R2                                                                                                                                                                                                                                                                                                                                                  |
| Article Type:                   | Research                                                                                                                                                                                                                                                                                                                                                                |
| Date Submitted by the Author:   | 01-Mar-2013                                                                                                                                                                                                                                                                                                                                                             |
| Complete List of Authors:       | Hefter, Harald<br>Benecke, Rainer; University of Rostock, Department of Neurology<br>Erbguth, Frank; Klinikum Nürnberg, Department of Neurology<br>Jost, Wolfgang; Deutsche Klinik fuer Diagnostik, Neurology<br>Reichel, Gerhard; Deutsche Klinik für Diagnostik, Out-Patient Department of Neurology<br>Wissel, Joerg; Kliniken Beelitz GmbH, Department of Neurology |
| <b>Primary Subject Heading</b>: | Neurology                                                                                                                                                                                                                                                                                                                                                               |
| Secondary Subject Heading:      | Rehabilitation medicine, Pharmacology and therapeutics                                                                                                                                                                                                                                                                                                                  |
| Keywords:                       | Neuromuscular disease < NEUROLOGY, Adult neurology < NEUROLOGY, REHABILITATION MEDICINE                                                                                                                                                                                                                                                                                 |
|                                 |                                                                                                                                                                                                                                                                                                                                                                         |

SCHOLARONE™  
Manuscripts

only

**Title:** An open-label cohort study of the improvement of quality of life and pain in *de novo* cervical dystonia patients after injections with 500 U botulinum toxin A (Dysport®)

**Authors:** Hefter H,<sup>1</sup> Benecke R,<sup>2</sup> Erbguth F,<sup>3</sup> Jost W,<sup>4</sup> Reichel G,<sup>5</sup> Wissel J<sup>6</sup>

**Affiliations:**

<sup>1</sup>Department of Neurology, University of Düsseldorf, Moorenstrasse 5, 40225 Düsseldorf, Germany

<sup>2</sup>Department of Neurology, University of Rostock, Gehlsheimer Str. 20, 18147 Rostock, Germany

<sup>3</sup>Department of Neurology, Klinikum Nürnberg, Breslauer Str. 201, 90471 Nürnberg, Germany

<sup>4</sup>Department of Neurology, Deutsche Klinik für Diagnostik, Aukammallee 33, 65191 Wiesbaden, Germany

<sup>5</sup>Out-Patient Department of Neurology, Paracelsus Klinik, Werdauer Strasse 68, 08060 Zwickau, Germany

<sup>6</sup>Department of Neurology, Kliniken Beelitz GmbH, Paracelsusring 6a, 14547 Beelitz-Heilstätten, Germany

**Corresponding author:**

Harald Hefter

Department of Neurology

University of Düsseldorf

Moorenstrasse 5

40225 Düsseldorf

Germany

Tel: +49 211 81 17 025

Fax: +49 211 81 04 903

Email: harald.hefter@online.de

“The Corresponding Author has the right to grant on behalf of all authors and does grant on behalf of all authors, an exclusive licence (or non-exclusive for government employees) on a worldwide basis to the BMJ Group and co-owners or contracting owning societies (where published by the BMJ Group on their behalf), and its Licensees to permit this article (if accepted) to be published in BMJ Open and any other BMJ Group products and to exploit all subsidiary rights, as set out in our licence.”

**Journal:** *BMJ Open*

**Word count (text)/limit:** 3675/4000

**Word count (abstract)/limit:** 293/300

1  
2 **Tables/Figures:** 0/4 (limit 5)

3 **References/limit:** 11/40

4  
5  
6 **Short title:** Dysport for treatment of cervical dystonia

7  
8  
9 **Clinical trials information:** (NCT00447772; clinicaltrials.gov)

10  
11  
12 **Key words (limit of 5):** *de novo* cervical dystonia, quality of life, pain, Dysport, abobotulinumtoxinA

13  
14  
15  
16  
17  
18  
19  
20  
21  
22  
23  
24  
25  
26  
27  
28  
29  
30  
31  
32  
33  
34  
35  
36  
37  
38  
39  
40  
41  
42  
43  
44  
45  
46  
47  
48  
49  
50  
51  
52  
53  
54  
55  
56  
57  
58  
59  
60

For peer review only

**Abstract**

**Objectives:** It remains to be determined whether the benefits of botulinum toxin type A (BoNT-A) on cervical dystonia (CD) motor symptoms extend to improvements in patient quality of life (QoL). This analysis of a large, multicentre study was conducted with the aim of investigating changes in QoL and functioning among *de novo* patients receiving 500 U BoNT-A (abobotulinumtoxinA; Dysport®) for the treatment of the two most frequent forms of cervical dystonia (CD), predominantly torticollis and laterocollis.

**Design:** Prospective, open-label study of Dysport (500 U; Ipsen Biopharm Ltd) administered according to a defined intramuscular injection algorithm.

**Setting:** German and Austrian outpatient clinics.

**Participants:** 516 male and female patients (aged  $\geq 18$  years) with *de novo* CD. The majority of patients had torticollis (78.1%). Thirty-five patients had concomitant depression (MedDRA-defined).

**Main outcome measures:** Change from baseline to Week 4 and Week 12 in Craniocervical Dystonia Questionnaire (CDQ-24) total and subscale scores, patient diary items ('day-to-day capacities and activities', 'pain', and 'duration of pain'), and global assessment of pain.

**Results:** Significant improvements were observed in CDQ-24 total and subscale scores at Week 4 and were sustained up to Week 12 ( $p < 0.001$ ). Changes in CDQ-24 scores did not significantly differ between the torticollis and laterocollis groups or between patients with or without depression. There were also significant reductions in patient diary item scores for activities of daily living, pain and pain duration at Weeks 4 and 12 ( $p < 0.001$ ). Pain relief (less or no pain) was reported by 66.0% and 74.1% of patients at Week 4 and Week 12, respectively. Changes in pain parameters demonstrated a positive relationship with change in Tsui score.

**Conclusions:** After standardized open-label treatment with Dysport 500 U, improvements in QoL and pain intensity up to 12 weeks in patients with CD were observed.

## Article summary

### Article focus:

- To test the hypothesis whether a modification of clinical symptoms is correlated to quality of life (QoL) parameters after treatment with botulinum toxin type A (BoNT-A)
- Investigation of the QoL and pain reduction benefits of Dysport when administered for the *de novo* management of torticollis and laterocollis in a large cervical dystonia (CD) patient population

### Key messages:

- Dysport 500 U significantly improves QoL, as rated by CDQ-24, in *de novo* patients with heterogeneous forms of CD
- Dysport 500 U treatment results in significant reductions in pain (on several outcome measures) in *de novo* patients with heterogeneous forms of CD

### Strengths and limitations of this study:

- This is the largest prospective, open-label cohort study of QoL in CD patients to date
- This study reflects the short-term effects of Dysport arising from a single 500 U administration; therefore, long-term studies are required to determine whether the observed beneficial effects on symptoms and QoL can be sustained with repeated treatment.



## INTRODUCTION

Cervical dystonia (CD), the most frequent form of focal dystonia, may present as idiopathic or secondary disease.[1] Idiopathic CDs are characterised by abnormal, involuntary muscle contractions, resulting in abnormal head movements and various undesired positions of the head.[2] The disorder is commonly classified as a function of the direction of abnormal head position – torticollis (turning of the head), laterocollis (head tilt), retrocollis (neck extension), antecollis (flexion), or, most frequently, a combination of the above.[3] Increased involuntary activity in affected muscles frequently leads to hypertrophy, and resulting symptoms include pain in the region of the neck and shoulder, decreased range of motion, and impairment of voluntary movement of the head. Reduction of muscle activity with local botulinum toxin type A (BoNT-A) injections is recommended as the first-line treatment option for CD.[4] The efficacy and tolerability of abobotulinumtoxinA (Dysport®, Ipsen Biopharm Ltd.) and other BoNT-A preparations for the treatment of CD has been demonstrated in randomised, placebo-controlled trials and open-label extension studies, with symptom relief being sustained for up to 3 months or 4 treatment cycles, respectively.[4-8]

Clinical symptoms of CD (for example, neck pain) cause significant disability that interferes with patients' daily functioning, such as the ability to remain in employment.[9] Moreover, a significant negative impact on quality of life (QoL) is seen with CD and is comparable to that seen with other serious disabling illnesses, such as multiple sclerosis, Parkinson's disease and stroke.[10] In a study of 289 patients with CD from seven European countries, concomitant depression was identified as one of the two strongest predictors of poor QoL (alongside anxiety), in addition to response to botulinum toxin, self-deprecation, stigma, and other patient-related factors.[11] Successful treatment of motor symptoms by existing treatments does not necessarily entail a positive influence on patient QoL.[12] It is, therefore, important to analyse whether clinically effective treatment of the movement disorder also leads to improvements in social and emotional wellbeing for patients and a positive impact on their daily functions and activities.

A large, prospective, open, multicentre study was conducted to evaluate the effectiveness and safety of a single dose of Dysport (500 U) for the treatment of the two most frequent forms of CD.[13] Treatment was given according to a standardised algorithm based on the two most frequent forms of CD, predominantly torticollis and laterocollis. Evaluated over 12 weeks, CD symptom severity was assessed using an established scale (the Tsui scale), with the patient in a standardised seated position.[14] Results from the study showed that Dysport was effective and well tolerated for the *de novo* management of a range of heterogeneous forms of CD, when using a standardised regimen that allows tailored dosing based on individual symptom assessment.[13] QoL parameters were assessed as secondary objectives throughout the study using a patient disease questionnaire (Cranio-cervical Dystonia Questionnaire; CDQ-24)[15] and patient diaries.

1 Here, we present results of the QoL objectives, which aimed to determine the effects of treatment  
2 with Dysport 500 U on patient QoL, and everyday functions and activities. Pain may exert an  
3 influence on the patient's rating of the efficacy of BoNT-A therapy, which is not taken into account  
4 using the Tsui score. Consequently, pain was additionally evaluated using the above-mentioned  
5 measures.  
6  
7  
8  
9  
10  
11  
12  
13  
14  
15  
16  
17  
18  
19  
20  
21  
22  
23  
24  
25  
26  
27  
28  
29  
30  
31  
32  
33  
34  
35  
36  
37  
38  
39  
40  
41  
42  
43  
44  
45  
46  
47  
48  
49  
50  
51  
52  
53  
54  
55  
56  
57  
58  
59  
60

## METHODS

### Study design, patients and treatment

This was a non-controlled, prospective, multicentre, open-label study conducted in Germany and Austria to investigate the comparable effectiveness and safety of 500 U Dysport for the treatment of patients (aged  $\geq 18$  years) with heterogeneous forms of CD, naïve to BoNT-A. Full details of study design, and inclusion and exclusion criteria, have been published previously by Hefter et al. and are available through BMJ Open.[13]

All patients received a single intramuscular injection with 500 U Dysport, diluted in 2.5 mL 0.9% NaCl. Full details of the standardised injection protocol based on the symptoms assessed with the Tsui score have also been published previously.[13]

### Assessments

The severity of CD was assessed by the investigating physicians at Visit 1 (Week 0; baseline), Visit 2 (Week 4) and Visit 3 (Week 12) using the Tsui rating scale total score under standardised conditions, with the patient in a relaxed seated position. The primary efficacy outcome measure was the change from baseline to Week 4 in total Tsui score after treatment.[13]

### CDQ-24

The effects of treatment on QoL, pain and any restrictions of possible everyday functions and activities of the patient were assessed in comparison to baseline values using the validated CDQ-24.[15] The CDQ-24 is a disease-specific QoL instrument designed to investigate problems in daily living skills related to CD, and comprises 24 items within five domains related to stigma (questions 7, 8, 9, 10, 18, 22); emotional wellbeing (questions 11, 12, 13, 14, 15); pain (questions 4, 5, 21); activities of daily living (questions 1, 2, 3, 6, 19, 20); and social/family life (questions 16, 17, 23, 24). Scores for each item range from 0 to 4, representing increasing severity of impairment. In order to obtain scores for the individual subscales, the total score of each subscale (sum of the individual item scores) was transformed linearly to a 0 to 100 scale, where a score of 0 indicates the best and a score of 100 the worst possible QoL (which explains why some subscores, e.g. stigma, have higher values than the total score). Assessment of the CDQ-24 was conducted at baseline (Visit 1), Week 4 (Visit 2) and Week 12 (Visit 3).

### Patient diary

Patients were provided with a diary, which was used to self-record weekly ratings (on an 11-point visual analogue scale; VAS) for items related to 'Day-to-day capacities and activities' (0 = not affected, 10 = very severely affected), 'Pain' (0 = no pain, 10 = strongest imaginable pain) and 'Duration of pain' (0 = never pain, 10 = constant pain). Assessment of the patient diary was conducted at baseline (Visit 1), Week 4 (Visit 2) and Week 12 (Visit 3).

### *Global assessment of pain*

At Visits 2 and 3, patients were required to assess change of pain associated with CD according to the following response categories: 1 = no pain (anymore); 2 = less pain; 3 = no change; 4 = more pain.

### **Statistical analyses**

All efficacy and QoL assessments were conducted in the intent-to-treat (ITT) population (i.e. all patients of the safety population with a baseline [Visit 1, Week 0] and a post-baseline [Visit 2, Week 4 or Visit 3, Week 12] assessment of the Tsui rating scale).

Time course was analysed over Visits 1, 2 and 3 or Week 0, 4, 12, respectively, of CDQ-24 subscale 'pain', diary item 'pain', global assessment of pain (at Visits 2 and 3) and CDQ-24 total score for patients with valid data for all three pain assessments at all visits.

Inferential analyses of CDQ-24 total score and subscale changes from baseline at Visits 2 and 3 were conducted for the total population and by main type of CD. Descriptive and inferential analyses of diary item changes from baseline at Weeks 4 and 12 were performed for the total population and by main type of CD. Descriptive analyses of standardized pain measures (global assessment of pain by patient at Visits 2 and 3; CDQ-24 'pain' change from baseline at Visits 2 and 3; diary items 'pain' and 'pain duration' changes from baseline at Weeks 4 and 12) were assessed by main type of CD. All pain statements were documented differently; in order to allow comparisons between the different assessments, all pain measures were converted to a common scale using the following categories for change from baseline: *less or no pain; no change; or more pain*.

Pearson correlation analyses were performed of total Tsui score change from baseline at Visit 2 and diary items 'pain' and 'pain duration' changes from baseline at Week 4, and CDQ-24 subscale 'pain' change from baseline at Week 4. In addition, Pearson correlation analyses were performed between CDQ-24 total score and subscale score changes from baseline and changes from baseline for items of the patient diary.

Additional *post-hoc* analyses were carried out to investigate the impact of concomitant depression on treatment effectiveness and QoL.

## RESULTS

### Patient disposition and demographics

Baseline demographic, safety and tolerability data for all patients are available in the 2011 BMJ Open article by Heffer et al.[13] Of the 516 patients enrolled in the study, safety data were available for all but one patient (safety population: n=515). At least one adverse event was experienced by 213 (41.4%) of patients, of which 155 (30.1%) were considered to be related to study medication. Data of the Tsui rating scale at baseline (visit 1) and at least one post-baseline visit (visit 2 or 3) were available in 503 patients (ITT population). Overall, 26 patients discontinued the study prematurely, with the main reasons cited as insufficient compliance and lost to follow-up.

The majority of patients had torticollis (n=402; 78.1%; 112 patients [21.7%] had laterocollis; type of CD was unknown in one patient). Baseline characteristics were generally similar between patients with torticollis and laterocollis, as shown by Heffer et al. (2011).[13] The proportion of patients with tremor was similar in both torticollis (36.1%) and laterocollis (36.6%) groups. However, approximately half of the laterocollis patients (47.3%) were affected by shoulder elevation compared with only one-third of torticollis patients (31.3%). The majority of patients in the total population (56.5%) were affected by pain (torticollis: 54.5%; laterocollis: 64.3%).

Mean CDQ-24 total score at baseline for the overall patient population was 39.6 ( $\pm 18.8$  [39.8 for ITT population]). Baseline mean CDQ-24 total scores did not differ markedly between the main CD types: torticollis (39.9) and laterocollis (38.8).

After analysis of the study data, 35 patients were identified with depression as concomitant disease, according to the preferred MedDRA term (6.8% of the total population). The Tsui score at baseline was comparable between patients with (n=34) and without (n=469) depression (8.6 and 8.4, respectively), as well as the decrease in Tsui score at Week 4 minus baseline ( $-4.0$  and  $-3.8$ , respectively).

### Treatments and dosing

All treated patients received Dysport 500 U at baseline, with the exception of three patients who received 360, 400 and 460 U. The most frequently reported concomitant medications (>10% of patients) by therapeutic class were beta-blocking agents (19.0%), agents acting on the renin-angiotensin system (14.4%), psychoanaleptics (13.6%), thyroid therapy (13.0%) and analgesics (10.1%). Use of concomitant medication was similar across CD subtypes.

### CDQ-24

In the total patient population, treatment with Dysport was associated with a statistically significant improvement in the CDQ-24 total score from baseline at Week 4 (decrease of 11.1 points [95%

1 confidence interval (CI)  $-12.5, -9.6$ ]; mean score: 28.7), which was maintained up to Week 12  
2 (decrease of 11.8 points [95% CI  $-13.1, -10.4$ ]; mean score: 28.0) (Figure 1,  $p < 0.001$  at Week 4  
3 and Week 12 vs. baseline).  
4  
5

6  
7  
8 At Week 4 and Week 12, Dysport treatment significantly improved all CDQ-24 subscale scores  
9 from baseline (Figure 1,  $p < 0.001$ ). Patient-rated QoL at baseline was highest (worst) for subscale  
10 'stigma' (mean score: 50.4) and lowest (best) for social/family life (mean score: 21.9). Accordingly,  
11 mean changes from baseline (at Week 4 and Week 12) were highest for subscale 'stigma' ( $-16.8$   
12 [95% CI  $-19.0, -14.7$ ] and  $-16.4$  [95% CI  $-18.4, -14.3$ ], respectively) and lowest for subscale  
13 'social/family life' ( $-5.6$  [95% CI  $-7.2, -4.0$ ] and  $-6.7$  [95% CI  $-8.3, -5.1$ ], respectively). For all  
14 subscales, except 'stigma', continued improvement was seen from Week 4 through to Week 12.  
15 The small worsening in 'stigma' seems marginal when compared with the improvements seen in  
16 other categories, but correlates with an increasing Tsui score between Week 4 and Week 12.  
17  
18  
19  
20  
21

22  
23 There were no statistically significant differences in QoL results between the torticollis and  
24 laterocollis groups (for total score and subscores).  
25  
26

27  
28 Higher CDQ-24 total scores were recorded for the subgroup of patients with depression, with mean  
29 scores at Visit 1 (baseline), Visit 2 and Visit 3 of 51.8, 41.7 and 38.5, respectively, compared with  
30 38.9, 27.8 and 27.2, respectively, for those without depression. However, the changes in CDQ-24  
31 total score from baseline to Week 4 and Week 12 were comparable between patients with and  
32 without depression. The difference between patients with and without depression was most  
33 apparent for the CDQ-24 subscale 'emotional wellbeing' at Visit 1, 2, and 3: mean scores of 57.5,  
34 47.4 and 43.8, respectively, for patients with depression, and 38.0, 27.7 and 26.7, respectively, for  
35 those without depression. No differences were observed for CDQ-24 total scores between the  
36 torticollis and laterocollis groups of patients with depression. However, a noticeably smaller change  
37 from baseline to Visit 2 was seen in the depressed laterocollis subgroup for 'emotional wellbeing'  
38 ( $-4.5$ ) when compared with the depressed torticollis subgroup ( $-12.5$ ).  
39  
40  
41  
42  
43  
44  
45

#### 46 **Patient diary**

47 Similar to the results for CDQ-24, patients' diaries reflected positive treatment effects of Dysport on  
48 the VAS-assessed activities of daily living, pain and pain duration (mean  $\pm$  standard deviation  
49 [ $\pm$ SD] baseline values  $5.3 \pm 2.8$ ,  $4.1 \pm 3.0$  and  $4.7 \pm 3.4$  points, respectively). As shown in Figure 2,  
50 for the total population, 'Pain', 'Pain duration' and 'Day-to-day functions and activities' significantly  
51 improved at Week 4 and Week 12 versus baseline ( $p < 0.001$ ). For 'Pain' and 'Pain duration', there  
52 was further mild improvement from Week 4 to Week 12.  
53  
54  
55  
56  
57  
58  
59  
60

1  
2 Descriptive and t-test statistical analyses of diary item changes of the CD subgroups (torticollis and  
3 laterocollis) from baseline to Week 4 and Week 12 showed that all changes were statistically  
4 significant ( $p < 0.05$ ), with the exception of change of 'Day-to-day functions and activities' of  
5 laterocollis patients between baseline and Week 12 ( $p = 0.0531$ ). There were no other statistically  
6 significant differences in patient diary results in the torticollis and laterocollis subgroups.  
7  
8

### 9 10 11 **Global assessment of pain**

12 Most patients judged pain relief higher at Week 12 than at Week 4. Pain relief (less or no pain) was  
13 perceived by 330 patients (66.0%) at Week 4 and by 363 patients (74.1%) at Week 12 (no change:  
14 16.4% at Week 4 and 16.9% at Week 12; more pain: 17.6% at Week 4 and 9.0% at Week 12).  
15  
16

### 17 18 19 **Results of correlation analyses**

#### 20 *CDQ-24 and Tsui score*

21 Total CDQ-24 and all CDQ-24 subscores correlated significantly at baseline with Tsui score  
22 ( $p < 0.001$ ), with a correlation coefficient (R) varying between 0.17 and 0.27. Comparing the time  
23 course of Tsui score and QoL, the positive trend of the CDQ-24 total score at Week 4 (24%  
24 improvement) continued up to Week 12 (27.5% improvement), although the Tsui total score  
25 deteriorated between Week 4 (44.3% improvement) and Week 12 (24.3% improvement) in all  
26 patients (Figure 3). Nevertheless, statistically significant correlations ( $p < 0.001$ ) were seen between  
27 changes from baseline to Visits 2 (Figure 4) and 3 in total CDQ-24 score and in Tsui total score,  
28 but the correlation at Week 4 was slightly higher ( $R = 0.26$ ) than at Week 12 ( $R = 0.24$ ). Correlations  
29 ( $R < 0.3$ ) were also seen between changes from baseline to Visits 2 and 3 in individual CDQ-24  
30 subscale scores and in Tsui total score, which were statistically significant ( $p < 0.001$ ) for 'stigma',  
31 'emotional wellbeing', 'pain' and 'activities of daily living'. For social/family life, the correlation was  
32 significant at Week 4 ( $p < 0.01$ ) but not at Week 12 ( $p = 0.054$ ).  
33  
34  
35  
36  
37  
38  
39  
40  
41

#### 42 *Pain and Tsui score*

43 A correlation was found between the global pain assessment and the Tsui score for the total  
44 population: patients with an assessment of 'less pain' had a higher decrease in mean Tsui score at  
45 Week 4 ( $-4.5$ ) than patients with 'no change in pain' ( $-3.0$ ) and patients with 'more pain' ( $-3.2$ ),  
46 respectively. The highest decrease in mean Tsui score (Visit 2 vs. baseline:  $-4.9$ ) was achieved by  
47 patients in the laterocollis group in which 64.3% of the patients had reported pain at baseline vs.  
48 54.5% in the torticollis group.  
49  
50  
51  
52

#### 53 *Global assessment of pain, CDQ-24 subscale pain and patient diary pain*

54 Overall, a significant positive relationship ( $p < 0.001$ ) was seen between all pain parameters (i.e.  
55 CDQ-24, patient diary and global assessment of pain), with the CDQ subscale pain and the diary  
56 item of 'pain duration' showing the lowest correlation ( $R = 0.36$ ). The correlation between patient  
57  
58  
59  
60

1  
2 global assessment of pain and the pain intensity in the patient diary resulted in a much higher  
3 correlation coefficient ( $R=0.46$ ).  
4

5  
6 The percentage of patients reporting a global improvement of pain at Week 4 (66.0%) was higher  
7 than the percentage of patients documenting a pain improvement in their diaries (50.2–52.3%). At  
8 Week 12, the discrepancy was even higher between global improvement of pain (74.1%) and the  
9 percentage of patients documenting pain improvement in their diaries at this time point (48.3–  
10 55.2%).  
11

12  
13  
14 *CDQ-24 activities of daily living and patient diary daily activities*

15 Comparing all CDQ subscales with the patient diary, the highest correlations in the total population  
16 (and for both CD types) were observed between the patient diary item of 'Day-to-day function' and  
17 the CDQ-24 subscale of 'Activities of daily living' and 'Stigma', with  $R=0.48$  and  $0.37$  (for total  
18 population), respectively, at Week 4, and  $R=0.43$  and  $0.38$  (for total population), respectively, at  
19 Week 12 ( $p<0.001$ ).  
20  
21  
22  
23  
24  
25  
26  
27  
28  
29  
30  
31  
32  
33  
34  
35  
36  
37  
38  
39  
40  
41  
42  
43  
44  
45  
46  
47  
48  
49  
50  
51  
52  
53  
54  
55  
56  
57  
58  
59  
60



## DISCUSSION

In this study, the largest published, prospective, open-label cohort study of *de novo* patients with CD to date, demonstrate that a single dose of 500 U Dysport given according to a standardized injection scheme resulted in an improvement in disease-related impairment of QoL, as assessed by CDQ-24. Notably, the CDQ-24 results in Week 12 were better than those recorded in Week 4, despite an increase (worsening) of Tsui score (Figure 3), suggesting that improvements in QoL are maintained for a clinically significant duration. Our findings imply that the positive effects of BONT-A following treatment are encouraging to patients and helps them to gain perspective on their condition. Improvement of QoL seems to be better at Week 12, just before the second injection, compared to Week 4 when the injection has its maximal effect. This aspect and the weak correlation between improvement in CDQ-24 and Tsui underscore the involvement of additional factors beyond abnormal head posture in influencing QoL in CD. We believe that patients appreciate improvements in their condition relative to baseline and that severity of CD can systematically be reduced by repetitive injections every 3 months. This perspective potentially accounts for better scores at Week 12 compared to Week 4. Additionally, greater improvement at Week 12 compared with Week 4 may reflect the ability of the CDQ-24 to capture longer-term changes in QoL.[15]

Improvement of QoL items linked to abnormal head posture, such as stigma, did however follow the temporal course of head position, with worse scores at Week 12 than at Week 4. This is in contrast to the other subscales of the CDQ-24, which all showed continued improvement. Stigma is associated with the worst baseline CDQ-24 subscale score for all patients. The appearance of patients can be seriously affected by involuntary movements seen in CD and self-perceived stigma can be a major source of disability.[11, 16] Indeed, results from the present study show that stigma is seemingly important for the everyday function of patients, with a positive correlation being observed between the CDQ-24 subscale 'Stigma' and the diary item of 'Day-to-day functions and activities'.

Pain is another important factor influencing QoL. Interestingly, better improvements in pain were recorded when the clinician was present for the assessment (global assessment of pain) than rated by the patients using their diaries at home. Regardless, systematic improvement of pain, not only of pain intensity but also of pain duration, were reported by all assessments. In general, an improvement of Tsui score correlated positively with an improvement of pain in this study, with patients recording less pain on the global pain assessment achieving the greatest reduction in Tsui total score.

1  
2 In this study, patients with depression as concomitant disease showed worse QoL scores at  
3 baseline. Importantly, following Dysport treatment, patients with depression experienced similar  
4 benefits to those without depression, as demonstrated by similar changes from baseline at Week 4  
5 and Week 12 for the Tsui score, and for QoL between the depressed and non-depressed  
6 subgroups. The ability of BONT-A treatment to improve QoL in the presence of concomitant  
7 depression is particularly pertinent in view of published observations highlighting the role of  
8 depression as a key determinant of poor QoL in patients with CD.[11]  
9  
10  
11  
12

13  
14 Although laterocollis patients responded well according to Tsui score, pain appeared to be more  
15 common in this patient group than in patients with torticollis. The higher proportion of shoulder  
16 elevation in laterocollis patients may be one possible explanation for the increased rate of  
17 documented pain in these patients. As presented previously,[13] improvements in CD symptoms  
18 were confirmed by investigator and patient global assessment of symptoms without distinct  
19 (significant) group differences, although laterocollis patients experienced more frequent severe  
20 muscle weakness as an adverse event than torticollis patients (8.9% laterocollis, n=10 vs. 1.7%  
21 torticollis, n=7). Investigator and patient ratings of tolerability also varied most in the laterocollis  
22 group at Week 4, which could probably be explained by the higher rate of severe muscular  
23 weakness reported in these patients.[13] Although torticollis and laterocollis patients showed the  
24 same clinical response in the Tsui score, there are obviously differences between the two groups  
25 in disease perception. More analyses of the available study data including side effects, such as  
26 muscular weakness, may help to understand these apparent inconsistencies. Moreover, further  
27 studies may clarify if this was a random effect or if these patients would benefit from longer  
28 treatment duration with Dysport. Finally, the specific head position, i.e. whether the head is tilted or  
29 rotated, does not seem to play an essential role in emotional and social wellbeing; patients with  
30 either torticollis or laterocollis demonstrated comparable results in the CDQ-24 subscale 'emotional  
31 wellbeing' at baseline.  
32  
33  
34  
35  
36  
37  
38  
39  
40  
41  
42

43 The results from this study support those from a published study by Ben-Shlomo *et al.*, which  
44 demonstrated that, in addition to disease severity, QoL in patients with CD is predominantly  
45 determined by factors such as self-esteem, self-deprecation, stigma and depression.[11]  
46 Consequently, the care of these patients should not only focus on the reduction of CD symptom  
47 severity, but also on the improvement of the patient's psychological wellbeing. The use of  
48 pharmacological treatments with the ability to reduce disease severity has been shown to have a  
49 major benefit on both the physical and mental wellbeing of CD patients.[11] Recent controlled  
50 studies, for example,[17] have shown that short-term treatment with a combination of  
51 pharmacological therapy (BoNT-A) and a physical treatment programme (comprising self-control  
52 techniques and counselling) may be more effective than a sole pharmacological intervention.  
53  
54  
55  
56  
57  
58  
59  
60

1  
2 Therefore, further studies investigating the long-term effects of pure pharmacological and  
3 multidimensional treatment programmes on QoL are warranted.  
4

5  
6 In conclusion, CD is a disabling and often painful illness that interferes with activities of daily living.  
7 As a result, CD has a significant adverse impact on patient's physical and mental wellbeing and  
8 QoL. Results from this large, prospective, open-label study support the ability of Dysport 500 U to  
9 provide sustained efficacy in reducing motor symptoms coincident with significant improvements in  
10 pain and QoL among patients with CD, and provide the foundation for further investigation in  
11 randomised, controlled studies.  
12  
13  
14

### 15 16 17 **Acknowledgements**

18 Data management and statistical analyses were performed by GKM Gesellschaft für  
19 Therapieforschung in Munich, Germany. Editorial assistance for the preparation of this  
20 manuscript was provided by Ogilvy Healthworld Medical Education; funding for this was  
21 provided by Ipsen Pharma. The authors would like to thank Christiane Colling, PhD,  
22 Medical Project Manager, Ipsen Pharma, for her assistance in the conduct of the study  
23 and for review of the manuscript.  
24

### 25 **Competing interests (this article)**

26 No competing interests. HH was the coordinating investigator of this study.  
27  
28

### 29 30 **Competing interests (previous 12 months)**

31 All authors are consultants for Ipsen  
32  
33

### 34 **Funding**

35 This study was supported by Ipsen Pharma GmbH, Germany. The contents of this  
36 publication, especially the conclusions expressed, are those of the authors of the  
37 manuscript only. Funding from Ipsen Pharma made the conduct of the study, the previous  
38 publication of primary outcomes, and this presentation of secondary outcomes possible.  
39 The decision to publish the results was the authors' only and was made independently  
40 from the funders. Study design and concept were developed by the authors in  
41 collaboration with Ipsen Pharma; study conduct and data collection were supported by  
42 Ipsen Pharma.  
43  
44

### 45 **Author contributions:**

46 All authors were involved in the concept and study design, study conduct, data collection, analysis  
47 and interpretation, manuscript writing, review and critique. All authors approved the final  
48 manuscript.  
49  
50  
51  
52  
53  
54  
55  
56  
57  
58  
59  
60

1  
2 **Figure 1:** Change in CDQ-24 total and subscale scores from baseline to Weeks 4 and 12 (ITT:  
3 total population).

4  
5 Total score and all subscores differed significantly from baseline to Week 4 and Week 12 ( $p < 0.001$   
6 at Week 4 and Week 12 vs. baseline).

7 ITT, intent-to-treat.

8 \*Change from baseline score was worse at Week 12 vs. Week 4.

9  
10  
11 **Figure 2:** Change in patient diary visual analogue score (VAS) from baseline to Weeks 4 and 12  
12 (ITT: total population).

13  
14 t-test analysis:  $p < 0.001$  at Week 4 and Week 12 vs. baseline.

15 ITT, intent-to-treat.

16 \*Change from baseline score was worse at Week 12 vs. Week 4.

17  
18  
19 **Figure 3:** Time course of change in total Tsui score and total CDQ24 score.

20  
21  
22 TSUI-Score: Week 4,  $n = 503$  patients; Week 12,  $n = 490$  patients.

23 CDQ-24: Week 4,  $n = 483$  patients; Week 12,  $n = 473$  patients.

24  
25  
26  
27 **Figure 4:** Correlation between change in CDQ-24 total score and change in total Tsui score from  
28 baseline to Week 4.

29  
30 Display of raw data; one dot may represent more than one patient.

31 Correlation coefficient: 0.26,  $p < 0.001$ ,  $n = 484$ .

32 (Week 12: Correlation coefficient: 0.24,  $p < 0.001$ ,  $n = 474$ ).

## References

1. Crowner BE. Cervical dystonia: disease profile and clinical management. *Phys Ther* 2007;**87**:1511-26.
2. Van Zandijcke M. Cervical dystonia (spasmodic torticollis). Some aspects of the natural history. *Acta Neurol Belg* 1995;**95**:210-5.
3. Velickovic M, Benabou R and Brin MF. Cervical dystonia pathophysiology and treatment options. *Drugs* 2001;**61**:1921-43.
4. Simpson DM, Blitzer A, Brashear A *et al*. Assessment: Botulinum neurotoxin for the treatment of movement disorders (an evidence-based review): report of the Therapeutics and Technology Assessment Subcommittee of the American Academy of Neurology. *Neurology* 2008;**70**:1699-706.
5. Poewe W, Deuschl G, Nebe A *et al*. What is the optimal dose of botulinum toxin A in the treatment of cervical dystonia? Results of a double blind, placebo controlled, dose ranging study using Dysport. German Dystonia Study Group. *J Neurol Neurosurg Psychiatry* 1998;**64**:13-7.
6. Wissel J, Kanovsky P, Ruzicka E *et al*. Efficacy and safety of a standardised 500 unit dose of Dysport (clostridium botulinum toxin type A haemagglutinin complex) in a heterogeneous cervical dystonia population: results of a prospective, multicentre, randomised, double-blind, placebo-controlled, parallel group study. *J Neurol* 2001;**248**:1073-8.
7. Truong D, Duane DD, Jankovic J *et al*. Efficacy and safety of botulinum type A toxin (Dysport) in cervical dystonia: results of the first US randomized, double-blind, placebo-controlled study. *Mov Disord* 2005;**20**:783-91.
8. Truong D, Lew MF and al. e. Long-term efficacy and safety of botulinum toxin type A (Dysport) in cervical dystonia. *Parkinsonism Relat Disord* Submitted;
9. Molho ES, Agarwal N, Regan K *et al*. Effect of cervical dystonia on employment: A retrospective analysis of the ability of treatment to restore premorbid employment status. *Mov Disord* 2009;**24**:1384-7.
10. Camfield LB-S, Y. Warner, T.T. Epidemiological Study of Dystonia in Europe Collaborative Group Impact of cervical dystonia on quality of life. *Mov Disord* 2002;**17**:838-41.
11. Ben-Shlomo Y, Camfield L and Warner T. What are the determinants of quality of life in people with cervical dystonia? *J Neurol Neurosurg Psychiatry* 2002;**72**:608-14.
12. Muller J, Kemmler G, Wissel J *et al*. The impact of blepharospasm and cervical dystonia on health-related quality of life and depression. *J Neurol* 2002;**249**:842-6.
13. Hefter H, Kupsch A, Müngersdorf M *et al*. A Botulinum Toxin A Treatment Algorithm for De Novo Management of Torticollis and Laterocollis. *BMJ Open* 2011;1:e000196. doi:10.1136/bmjopen-2011-000196
14. Tsui JK, Eisen A, Stoessl AJ *et al*. Double-blind study of botulinum toxin in spasmodic torticollis. *Lancet* 1986;**2**:245-7.
15. Muller J, Wissel J, Kemmler G *et al*. Craniocervical dystonia questionnaire (CDQ-24): development and validation of a disease-specific quality of life instrument. *J Neurol Neurosurg Psychiatry* 2004;**75**:749-53.
16. Rinnerthaler M, Mueller J, Weichbold V *et al*. Social stigmatization in patients with cranial and cervical dystonia. *Mov Disord* 2006;**21**:1636-40.

- 1  
2  
3  
4  
5  
6  
7  
8  
9  
10  
11  
12  
13  
14  
15  
16  
17  
18  
19  
20  
21  
22  
23  
24  
25  
26  
27  
28  
29  
30  
31  
32  
33  
34  
35  
36  
37  
38  
39  
40  
41  
42  
43  
44  
45  
46  
47  
48  
49  
50  
51  
52  
53  
54  
55  
56  
57  
58  
59  
60
17. Tassorelli C, Mancini F, Balloni L *et al*. Botulinum toxin and neuromotor rehabilitation: An integrated approach to idiopathic cervical dystonia. *Mov Disord* 2006;**21**:2240-3.

For peer review only

**Title:** An open-label cohort study of the improvement of quality of life and pain in *de novo* cervical dystonia patients after injections with 500 U botulinum toxin A (Dysport®)

**Authors:** Hefter H,<sup>1</sup> Benecke R,<sup>2</sup> Erbguth F,<sup>3</sup> Jost W,<sup>4</sup> Reichel G,<sup>5</sup> Wissel J<sup>6</sup>

**Affiliations:**

<sup>1</sup>Department of Neurology, University of Düsseldorf, Moorenstrasse 5, 40225 Düsseldorf, Germany

<sup>2</sup>Department of Neurology, University of Rostock, Gehlsheimer Str. 20, 18147 Rostock, Germany

<sup>3</sup>Department of Neurology, Klinikum Nürnberg, Breslauer Str. 201, 90471 Nürnberg, Germany

<sup>4</sup>Department of Neurology, Deutsche Klinik für Diagnostik, Aukammallee 33, 65191 Wiesbaden, Germany

<sup>5</sup>Out-Patient Department of Neurology, Paracelsus Klinik, Werdauer Strasse 68, 08060 Zwickau, Germany

<sup>6</sup>Department of Neurology, Kliniken Beelitz GmbH, Paracelsusring 6a, 14547 Beelitz-Heilstätten, Germany

**Corresponding author:**

Harald Hefter

Department of Neurology

University of Düsseldorf

Moorenstrasse 5

40225 Düsseldorf

Germany

Tel: +49 211 81 17 025

Fax: +49 211 81 04 903

Email: harald.hefter@online.de

“The Corresponding Author has the right to grant on behalf of all authors and does grant on behalf of all authors, an exclusive licence (or non-exclusive for government employees) on a worldwide basis to the BMJ Group and co-owners or contracting owning societies (where published by the BMJ Group on their behalf), and its Licensees to permit this article (if accepted) to be published in BMJ Open and any other BMJ Group products and to exploit all subsidiary rights, as set out in our licence.”

**Journal:** *BMJ Open*

**Word count (text)/limit:** 3675/4000

**Word count (abstract)/limit:** 293/300

1  
2 **Tables/Figures:** 0/4 (limit 5)

3 **References/limit:** 11/40

4  
5  
6 **Short title:** Dysport for treatment of cervical dystonia

7  
8  
9 **Clinical trials information:** (NCT00447772; clinicaltrials.gov)

10  
11  
12 **Key words (limit of 5):** *de novo* cervical dystonia, quality of life, pain, Dysport, abobotulinumtoxinA

13  
14  
15  
16  
17  
18  
19  
20  
21  
22  
23  
24  
25  
26  
27  
28  
29  
30  
31  
32  
33  
34  
35  
36  
37  
38  
39  
40  
41  
42  
43  
44  
45  
46  
47  
48  
49  
50  
51  
52  
53  
54  
55  
56  
57  
58  
59  
60

For peer review only



**Abstract**

**Objectives:** It remains to be determined whether the benefits of botulinum toxin type A (BoNT-A) on cervical dystonia (CD) motor symptoms extend to improvements in patient quality of life (QoL). This analysis of a large, multicentre study was conducted with the aim of investigating changes in QoL and functioning among *de novo* patients receiving 500 U BoNT-A (abobotulinumtoxinA; Dysport®) for the treatment of the two most frequent forms of cervical dystonia (CD), predominantly torticollis and laterocollis.

**Design:** Prospective, open-label study of Dysport (500 U; Ipsen Biopharm Ltd) administered according to a defined intramuscular injection algorithm.

**Setting:** German and Austrian outpatient clinics.

**Participants:** 516 male and female patients (aged  $\geq 18$  years) with *de novo* CD. The majority of patients had torticollis (78.1%). Thirty-five patients had concomitant depression (MedDRA-defined).

**Main outcome measures:** Change from baseline to Week 4 and Week 12 in Craniocervical Dystonia Questionnaire (CDQ-24) total and subscale scores, patient diary items ('day-to-day capacities and activities', 'pain', and 'duration of pain'), and global assessment of pain.

**Results:** Significant improvements were observed in CDQ-24 total and subscale scores at Week 4 and were sustained up to Week 12 ( $p < 0.001$ ). Changes in CDQ-24 scores did not significantly differ between the torticollis and laterocollis groups or between patients with or without depression. There were also significant reductions in patient diary item scores for activities of daily living, pain and pain duration at Weeks 4 and 12 ( $p < 0.001$ ). Pain relief (less or no pain) was reported by 66.0% and 74.1% of patients at Week 4 and Week 12, respectively. Changes in pain parameters demonstrated a positive relationship with change in Tsui score.

**Conclusions:** After standardized open-label treatment with Dysport 500 U, improvements in QoL and pain intensity up to 12 weeks in patients with CD were observed.

## Article summary

### Article focus:

- To test the hypothesis whether a modification of clinical symptoms is correlated to quality of life (QoL) parameters after treatment with botulinum toxin type A (BoNT-A)
- Investigation of the QoL and pain reduction benefits of Dysport when administered for the *de novo* management of torticollis and laterocollis in a large cervical dystonia (CD) patient population

### Key messages:

- Dysport 500 U significantly improves QoL, as rated by CDQ-24, in *de novo* patients with heterogeneous forms of CD
- Dysport 500 U treatment results in significant reductions in pain (on several outcome measures) in *de novo* patients with heterogeneous forms of CD

### Strengths and limitations of this study:

- This is the largest prospective, open-label cohort study of QoL in CD patients to date
- This study reflects the short-term effects of Dysport arising from a single 500 U administration; therefore, long-term studies are required to determine whether the observed beneficial effects on symptoms and QoL can be sustained with repeated treatment.

## INTRODUCTION

Cervical dystonia (CD), the most frequent form of focal dystonia, may present as idiopathic or secondary disease.[1] Idiopathic CDs are characterised by abnormal, involuntary muscle contractions, resulting in abnormal head movements and various undesired positions of the head.[2] The disorder is commonly classified as a function of the direction of abnormal head position – torticollis (turning of the head), laterocollis (head tilt), retrocollis (neck extension), antecollis (flexion), or, most frequently, a combination of the above.[3] Increased involuntary activity in affected muscles frequently leads to hypertrophy, and resulting symptoms include pain in the region of the neck and shoulder, decreased range of motion, and impairment of voluntary movement of the head. Reduction of muscle activity with local botulinum toxin type A (BoNT-A) injections is recommended as the first-line treatment option for CD.[4] The efficacy and tolerability of abobotulinumtoxinA (Dysport®, Ipsen Biopharm Ltd.) and other BoNT-A preparations for the treatment of CD has been demonstrated in randomised, placebo-controlled trials and open-label extension studies, with symptom relief being sustained for up to 3 months or 4 treatment cycles, respectively.[4-8]

Clinical symptoms of CD (for example, neck pain) cause significant disability that interferes with patients' daily functioning, such as the ability to remain in employment.[9] Moreover, a significant negative impact on quality of life (QoL) is seen with CD and is comparable to that seen with other serious disabling illnesses, such as multiple sclerosis, Parkinson's disease and stroke.[10] In a study of 289 patients with CD from seven European countries, concomitant depression was identified as one of the two strongest predictors of poor QoL (alongside anxiety), in addition to response to botulinum toxin, self-deprecation, stigma, and other patient-related factors.[11] Successful treatment of motor symptoms by existing treatments does not necessarily entail a positive influence on patient QoL.[12] It is, therefore, important to analyse whether clinically effective treatment of the movement disorder also leads to improvements in social and emotional wellbeing for patients and a positive impact on their daily functions and activities.

A large, prospective, open, multicentre study was conducted to evaluate the effectiveness and safety of a single dose of Dysport (500 U) for the treatment of the two most frequent forms of CD.[13] Treatment was given according to a standardised algorithm based on the two most frequent forms of CD, predominantly torticollis and laterocollis. Evaluated over 12 weeks, CD symptom severity was assessed using an established scale (the Tsui scale), with the patient in a standardised seated position.[14] Results from the study showed that Dysport was effective and well tolerated for the *de novo* management of a range of heterogeneous forms of CD, when using a standardised regimen that allows tailored dosing based on individual symptom assessment.[13] QoL parameters were assessed as secondary objectives throughout the study using a patient disease questionnaire (Cranio-cervical Dystonia Questionnaire; CDQ-24)[15] and patient diaries.

1 Here, we present results of the QoL objectives, which aimed to determine the effects of treatment  
2 with Dysport 500 U on patient QoL, and everyday functions and activities. Pain may exert an  
3 influence on the patient's rating of the efficacy of BoNT-A therapy, which is not taken into account  
4 using the Tsui score. Consequently, pain was additionally evaluated using the above-mentioned  
5 measures.  
6  
7  
8  
9  
10  
11  
12  
13  
14  
15  
16  
17  
18  
19  
20  
21  
22  
23  
24  
25  
26  
27  
28  
29  
30  
31  
32  
33  
34  
35  
36  
37  
38  
39  
40  
41  
42  
43  
44  
45  
46  
47  
48  
49  
50  
51  
52  
53  
54  
55  
56  
57  
58  
59  
60

## METHODS

### Study design, patients and treatment

This was a non-controlled, prospective, multicentre, open-label study conducted in Germany and Austria to investigate the comparable effectiveness and safety of 500 U Dysport for the treatment of patients (aged  $\geq 18$  years) with heterogeneous forms of CD, naïve to BoNT-A. Full details of study design, and inclusion and exclusion criteria, have been published previously by Hefter et al. and are available through BMJ Open.[13]

All patients received a single intramuscular injection with 500 U Dysport, diluted in 2.5 mL 0.9% NaCl. Full details of the standardised injection protocol based on the symptoms assessed with the Tsui score have also been published previously.[13]

### Assessments

The severity of CD was assessed by the investigating physicians at Visit 1 (Week 0; baseline), Visit 2 (Week 4) and Visit 3 (Week 12) using the Tsui rating scale total score under standardised conditions, with the patient in a relaxed seated position. The primary efficacy outcome measure was the change from baseline to Week 4 in total Tsui score after treatment.[13]

### CDQ-24

The effects of treatment on QoL, pain and any restrictions of possible everyday functions and activities of the patient were assessed in comparison to baseline values using the validated CDQ-24.[15] The CDQ-24 is a disease-specific QoL instrument designed to investigate problems in daily living skills related to CD, and comprises 24 items within five domains related to stigma (questions 7, 8, 9, 10, 18, 22); emotional wellbeing (questions 11, 12, 13, 14, 15); pain (questions 4, 5, 21); activities of daily living (questions 1, 2, 3, 6, 19, 20); and social/family life (questions 16, 17, 23, 24). Scores for each item range from 0 to 4, representing increasing severity of impairment. In order to obtain scores for the individual subscales, the total score of each subscale (sum of the individual item scores) was transformed linearly to a 0 to 100 scale, where a score of 0 indicates the best and a score of 100 the worst possible QoL (which explains why some subscores, e.g. stigma, have higher values than the total score). Assessment of the CDQ-24 was conducted at baseline (Visit 1), Week 4 (Visit 2) and Week 12 (Visit 3).

### Patient diary

Patients were provided with a diary, which was used to self-record weekly ratings (on an 11-point visual analogue scale; VAS) for items related to 'Day-to-day capacities and activities' (0 = not affected, 10 = very severely affected), 'Pain' (0 = no pain, 10 = strongest imaginable pain) and 'Duration of pain' (0 = never pain, 10 = constant pain). Assessment of the patient diary was conducted at baseline (Visit 1), Week 4 (Visit 2) and Week 12 (Visit 3).

### *Global assessment of pain*

At Visits 2 and 3, patients were required to assess change of pain associated with CD according to the following response categories: 1 = no pain (anymore); 2 = less pain; 3 = no change; 4 = more pain.

### **Statistical analyses**

All efficacy and QoL assessments were conducted in the intent-to-treat (ITT) population (i.e. all patients of the safety population with a baseline [Visit 1, Week 0] and a post-baseline [Visit 2, Week 4 or Visit 3, Week 12] assessment of the Tsui rating scale).

Time course was analysed over Visits 1, 2 and 3 or Week 0, 4, 12, respectively, of CDQ-24 subscale 'pain', diary item 'pain', global assessment of pain (at Visits 2 and 3) and CDQ-24 total score for patients with valid data for all three pain assessments at all visits.

Inferential analyses of CDQ-24 total score and subscale changes from baseline at Visits 2 and 3 were conducted for the total population and by main type of CD. Descriptive and inferential analyses of diary item changes from baseline at Weeks 4 and 12 were performed for the total population and by main type of CD. Descriptive analyses of standardized pain measures (global assessment of pain by patient at Visits 2 and 3; CDQ-24 'pain' change from baseline at Visits 2 and 3; diary items 'pain' and 'pain duration' changes from baseline at Weeks 4 and 12) were assessed by main type of CD. All pain statements were documented differently; in order to allow comparisons between the different assessments, all pain measures were converted to a common scale using the following categories for change from baseline: *less or no pain; no change; or more pain*.

Pearson correlation analyses were performed of total Tsui score change from baseline at Visit 2 and diary items 'pain' and 'pain duration' changes from baseline at Week 4, and CDQ-24 subscale 'pain' change from baseline at Week 4. In addition, Pearson correlation analyses were performed between CDQ-24 total score and subscale score changes from baseline and changes from baseline for items of the patient diary.

Additional *post-hoc* analyses were carried out to investigate the impact of concomitant depression on treatment effectiveness and QoL.

## RESULTS

### Patient disposition and demographics

Baseline demographic, safety and tolerability data for all patients are available in the 2011 BMJ Open article by Hefter et al.[13] Of the 516 patients enrolled in the study, safety data were available for all but one patient (safety population: n=515). At least one adverse event was experienced by 213 (41.4%) of patients, of which 155 (30.1%) were considered to be related to study medication. Data of the Tsui rating scale at baseline (visit 1) and at least one post-baseline visit (visit 2 or 3) were available in 503 patients (ITT population). Overall, 26 patients discontinued the study prematurely, with the main reasons cited as insufficient compliance and lost to follow-up.

The majority of patients had torticollis (n=402; 78.1%; 112 patients [21.7%] had laterocollis; type of CD was unknown in one patient). Baseline characteristics were generally similar between patients with torticollis and laterocollis, as shown by Hefter et al. (2011).[13] The proportion of patients with tremor was similar in both torticollis (36.1%) and laterocollis (36.6%) groups. However, approximately half of the laterocollis patients (47.3%) were affected by shoulder elevation compared with only one-third of torticollis patients (31.3%). The majority of patients in the total population (56.5%) were affected by pain (torticollis: 54.5%; laterocollis: 64.3%).

Mean CDQ-24 total score at baseline for the overall patient population was 39.6 ( $\pm 18.8$  [39.8 for ITT population]). Baseline mean CDQ-24 total scores did not differ markedly between the main CD types: torticollis (39.9) and laterocollis (38.8).

After analysis of the study data, 35 patients were identified with depression as concomitant disease, according to the preferred MedDRA term (6.8% of the total population). The Tsui score at baseline was comparable between patients with (n=34) and without (n=469) depression (8.6 and 8.4, respectively), as well as the decrease in Tsui score at Week 4 minus baseline ( $-4.0$  and  $-3.8$ , respectively).

### Treatments and dosing

All treated patients received Dysport 500 U at baseline, with the exception of three patients who received 360, 400 and 460 U. The most frequently reported concomitant medications (>10% of patients) by therapeutic class were beta-blocking agents (19.0%), agents acting on the renin-angiotensin system (14.4%), psychoanaleptics (13.6%), thyroid therapy (13.0%) and analgesics (10.1%). Use of concomitant medication was similar across CD subtypes.

### CDQ-24

In the total patient population, treatment with Dysport was associated with a statistically significant improvement in the CDQ-24 total score from baseline at Week 4 (decrease of 11.1 points [95%

1 confidence interval (CI)  $-12.5, -9.6$ ]; mean score: 28.7), which was maintained up to Week 12  
2 (decrease of 11.8 points [95% CI  $-13.1, -10.4$ ]; mean score: 28.0) (Figure 1,  $p < 0.001$  at Week 4  
3 and Week 12 vs. baseline).  
4  
5

6  
7  
8 At Week 4 and Week 12, Dysport treatment significantly improved all CDQ-24 subscale scores  
9 from baseline (Figure 1,  $p < 0.001$ ). Patient-rated QoL at baseline was highest (worst) for subscale  
10 'stigma' (mean score: 50.4) and lowest (best) for social/family life (mean score: 21.9). Accordingly,  
11 mean changes from baseline (at Week 4 and Week 12) were highest for subscale 'stigma' ( $-16.8$   
12 [95% CI  $-19.0, -14.7$ ] and  $-16.4$  [95% CI  $-18.4, -14.3$ ], respectively) and lowest for subscale  
13 'social/family life' ( $-5.6$  [95% CI  $-7.2, -4.0$ ] and  $-6.7$  [95% CI  $-8.3, -5.1$ ], respectively). For all  
14 subscales, except 'stigma', continued improvement was seen from Week 4 through to Week 12.  
15 The small worsening in 'stigma' seems marginal when compared with the improvements seen in  
16 other categories, but correlates with an increasing Tsui score between Week 4 and Week 12.  
17  
18  
19  
20  
21

22  
23 There were no statistically significant differences in QoL results between the torticollis and  
24 laterocollis groups (for total score and subscores).  
25  
26

27  
28 Higher CDQ-24 total scores were recorded for the subgroup of patients with depression, with mean  
29 scores at Visit 1 (baseline), Visit 2 and Visit 3 of 51.8, 41.7 and 38.5, respectively, compared with  
30 38.9, 27.8 and 27.2, respectively, for those without depression. However, the changes in CDQ-24  
31 total score from baseline to Week 4 and Week 12 were comparable between patients with and  
32 without depression. The difference between patients with and without depression was most  
33 apparent for the CDQ-24 subscale 'emotional wellbeing' at Visit 1, 2, and 3: mean scores of 57.5,  
34 47.4 and 43.8, respectively, for patients with depression, and 38.0, 27.7 and 26.7, respectively, for  
35 those without depression. No differences were observed for CDQ-24 total scores between the  
36 torticollis and laterocollis groups of patients with depression. However, a noticeably smaller change  
37 from baseline to Visit 2 was seen in the depressed laterocollis subgroup for 'emotional wellbeing'  
38 ( $-4.5$ ) when compared with the depressed torticollis subgroup ( $-12.5$ ).  
39  
40  
41  
42  
43  
44  
45

#### 46 **Patient diary**

47 Similar to the results for CDQ-24, patients' diaries reflected positive treatment effects of Dysport on  
48 the VAS-assessed activities of daily living, pain and pain duration (mean  $\pm$  standard deviation  
49 [ $\pm$ SD] baseline values  $5.3 \pm 2.8$ ,  $4.1 \pm 3.0$  and  $4.7 \pm 3.4$  points, respectively). As shown in Figure 2,  
50 for the total population, 'Pain', 'Pain duration' and 'Day-to-day functions and activities' significantly  
51 improved at Week 4 and Week 12 versus baseline ( $p < 0.001$ ). For 'Pain' and 'Pain duration', there  
52 was further mild improvement from Week 4 to Week 12.  
53  
54  
55  
56  
57  
58  
59  
60



1 Descriptive and t-test statistical analyses of diary item changes of the CD subgroups (torticollis and  
2 laterocollis) from baseline to Week 4 and Week 12 showed that all changes were statistically  
3 significant ( $p < 0.05$ ), with the exception of change of 'Day-to-day functions and activities' of  
4 laterocollis patients between baseline and Week 12 ( $p = 0.0531$ ). There were no other statistically  
5 significant differences in patient diary results in the torticollis and laterocollis subgroups.  
6  
7  
8  
9

### 10 **Global assessment of pain**

11 Most patients judged pain relief higher at Week 12 than at Week 4. Pain relief (less or no pain) was  
12 perceived by 330 patients (66.0%) at Week 4 and by 363 patients (74.1%) at Week 12 (no change:  
13 16.4% at Week 4 and 16.9% at Week 12; more pain: 17.6% at Week 4 and 9.0% at Week 12).  
14  
15  
16  
17

### 18 **Results of correlation analyses**

#### 19 *CDQ-24 and Tsui score*

20 Total CDQ-24 and all CDQ-24 subscores correlated significantly at baseline with Tsui score  
21 ( $p < 0.001$ ), with a correlation coefficient (R) varying between 0.17 and 0.27. Comparing the time  
22 course of Tsui score and QoL, the positive trend of the CDQ-24 total score at Week 4 (24%  
23 improvement) continued up to Week 12 (27.5% improvement), although the Tsui total score  
24 deteriorated between Week 4 (44.3% improvement) and Week 12 (24.3% improvement) in all  
25 patients (Figure 3). Nevertheless, statistically significant correlations ( $p < 0.001$ ) were seen between  
26 changes from baseline to Visits 2 (Figure 4) and 3 in total CDQ-24 score and in Tsui total score,  
27 but the correlation at Week 4 was slightly higher ( $R = 0.26$ ) than at Week 12 ( $R = 0.24$ ). Correlations  
28 ( $R < 0.3$ ) were also seen between changes from baseline to Visits 2 and 3 in individual CDQ-24  
29 subscale scores and in Tsui total score, which were statistically significant ( $p < 0.001$ ) for 'stigma',  
30 'emotional wellbeing', 'pain' and 'activities of daily living'. For social/family life, the correlation was  
31 significant at Week 4 ( $p < 0.01$ ) but not at Week 12 ( $p = 0.054$ ).  
32  
33  
34  
35  
36  
37  
38  
39  
40  
41

#### 42 *Pain and Tsui score*

43 A correlation was found between the global pain assessment and the Tsui score for the total  
44 population: patients with an assessment of 'less pain' had a higher decrease in mean Tsui score at  
45 Week 4 ( $-4.5$ ) than patients with 'no change in pain' ( $-3.0$ ) and patients with 'more pain' ( $-3.2$ ),  
46 respectively. The highest decrease in mean Tsui score (Visit 2 vs. baseline:  $-4.9$ ) was achieved by  
47 patients in the laterocollis group in which 64.3% of the patients had reported pain at baseline vs.  
48 54.5% in the torticollis group.  
49  
50  
51  
52

#### 53 *Global assessment of pain, CDQ-24 subscale pain and patient diary pain*

54 Overall, a significant positive relationship ( $p < 0.001$ ) was seen between all pain parameters (i.e.  
55 CDQ-24, patient diary and global assessment of pain), with the CDQ subscale pain and the diary  
56 item of 'pain duration' showing the lowest correlation ( $R = 0.36$ ). The correlation between patient  
57  
58  
59  
60

1 global assessment of pain and the pain intensity in the patient diary resulted in a much higher  
2 correlation coefficient ( $R=0.46$ ).  
3  
4

5  
6 The percentage of patients reporting a global improvement of pain at Week 4 (66.0%) was higher  
7 than the percentage of patients documenting a pain improvement in their diaries (50.2–52.3%). At  
8 Week 12, the discrepancy was even higher between global improvement of pain (74.1%) and the  
9 percentage of patients documenting pain improvement in their diaries at this time point (48.3–  
10 55.2%).  
11  
12

#### 13 *CDQ-24 activities of daily living and patient diary daily activities*

14 Comparing all CDQ subscales with the patient diary, the highest correlations in the total population  
15 (and for both CD types) were observed between the patient diary item of 'Day-to-day function' and  
16 the CDQ-24 subscale of 'Activities of daily living' and 'Stigma', with  $R=0.48$  and  $0.37$  (for total  
17 population), respectively, at Week 4, and  $R=0.43$  and  $0.38$  (for total population), respectively, at  
18 Week 12 ( $p<0.001$ ).  
19  
20  
21  
22  
23  
24  
25  
26  
27  
28  
29  
30  
31  
32  
33  
34  
35  
36  
37  
38  
39  
40  
41  
42  
43  
44  
45  
46  
47  
48  
49  
50  
51  
52  
53  
54  
55  
56  
57  
58  
59  
60

## DISCUSSION

In this study, the largest published, prospective, open-label cohort study of *de novo* patients with CD to date, demonstrate that a single dose of 500 U Dysport given according to a standardized injection scheme resulted in an improvement in disease-related impairment of QoL, as assessed by CDQ-24. Notably, the CDQ-24 results in Week 12 were better than those recorded in Week 4, despite an increase (worsening) of Tsui score (Figure 3), suggesting that improvements in QoL are maintained for a clinically significant duration. Our findings imply that the positive effects of BONT-A following treatment are encouraging to patients and helps them to gain perspective on their condition. Improvement of QoL seems to be better at Week 12, just before the second injection, compared to Week 4 when the injection has its maximal effect. This aspect and the weak correlation between improvement in CDQ-24 and Tsui underscore the involvement of additional factors beyond abnormal head posture in influencing QoL in CD. We believe that patients appreciate improvements in their condition relative to baseline and that severity of CD can systematically be reduced by repetitive injections every 3 months. This perspective potentially accounts for better scores at Week 12 compared to Week 4. Additionally, greater improvement at Week 12 compared with Week 4 may reflect the ability of the CDQ-24 to capture longer-term changes in QoL.[15]

Improvement of QoL items linked to abnormal head posture, such as stigma, did however follow the temporal course of head position, with worse scores at Week 12 than at Week 4. This is in contrast to the other subscales of the CDQ-24, which all showed continued improvement. Stigma is associated with the worst baseline CDQ-24 subscale score for all patients. The appearance of patients can be seriously affected by involuntary movements seen in CD and self-perceived stigma can be a major source of disability.[11, 16] Indeed, results from the present study show that stigma is seemingly important for the everyday function of patients, with a positive correlation being observed between the CDQ-24 subscale 'Stigma' and the diary item of 'Day-to-day functions and activities'.

Pain is another important factor influencing QoL. Interestingly, better improvements in pain were recorded when the clinician was present for the assessment (global assessment of pain) than rated by the patients using their diaries at home. Regardless, systematic improvement of pain, not only of pain intensity but also of pain duration, were reported by all assessments. In general, an improvement of Tsui score correlated positively with an improvement of pain in this study, with patients recording less pain on the global pain assessment achieving the greatest reduction in Tsui total score.

1  
2 In this study, patients with depression as concomitant disease showed worse QoL scores at  
3 baseline. Importantly, following Dysport treatment, patients with depression experienced similar  
4 benefits to those without depression, as demonstrated by similar changes from baseline at Week 4  
5 and Week 12 for the Tsui score, and for QoL between the depressed and non-depressed  
6 subgroups. The ability of BONT-A treatment to improve QoL in the presence of concomitant  
7 depression is particularly pertinent in view of published observations highlighting the role of  
8 depression as a key determinant of poor QoL in patients with CD.[11]  
9  
10  
11  
12

13  
14 Although laterocollis patients responded well according to Tsui score, pain appeared to be more  
15 common in this patient group than in patients with torticollis. The higher proportion of shoulder  
16 elevation in laterocollis patients may be one possible explanation for the increased rate of  
17 documented pain in these patients. As presented previously,[13] improvements in CD symptoms  
18 were confirmed by investigator and patient global assessment of symptoms without distinct  
19 (significant) group differences, although laterocollis patients experienced more frequent severe  
20 muscle weakness as an adverse event than torticollis patients (8.9% laterocollis, n=10 vs. 1.7%  
21 torticollis, n=7). Investigator and patient ratings of tolerability also varied most in the laterocollis  
22 group at Week 4, which could probably be explained by the higher rate of severe muscular  
23 weakness reported in these patients.[13] Although torticollis and laterocollis patients showed the  
24 same clinical response in the Tsui score, there are obviously differences between the two groups  
25 in disease perception. More analyses of the available study data including side effects, such as  
26 muscular weakness, may help to understand these apparent inconsistencies. Moreover, further  
27 studies may clarify if this was a random effect or if these patients would benefit from longer  
28 treatment duration with Dysport. Finally, the specific head position, i.e. whether the head is tilted or  
29 rotated, does not seem to play an essential role in emotional and social wellbeing; patients with  
30 either torticollis or laterocollis demonstrated comparable results in the CDQ-24 subscale 'emotional  
31 wellbeing' at baseline.  
32  
33  
34  
35  
36  
37  
38  
39  
40  
41  
42

43 The results from this study support those from a published study by Ben-Shlomo *et al.*, which  
44 demonstrated that, in addition to disease severity, QoL in patients with CD is predominantly  
45 determined by factors such as self-esteem, self-deprecation, stigma and depression.[11]  
46 Consequently, the care of these patients should not only focus on the reduction of CD symptom  
47 severity, but also on the improvement of the patient's psychological wellbeing. The use of  
48 pharmacological treatments with the ability to reduce disease severity has been shown to have a  
49 major benefit on both the physical and mental wellbeing of CD patients.[11] Recent controlled  
50 studies, for example,[17] have shown that short-term treatment with a combination of  
51 pharmacological therapy (BoNT-A) and a physical treatment programme (comprising self-control  
52 techniques and counselling) may be more effective than a sole pharmacological intervention.  
53  
54  
55  
56  
57  
58  
59  
60

1  
2 Therefore, further studies investigating the long-term effects of pure pharmacological and  
3 multidimensional treatment programmes on QoL are warranted.  
4

5  
6 In conclusion, CD is a disabling and often painful illness that interferes with activities of daily living.  
7 As a result, CD has a significant adverse impact on patient's physical and mental wellbeing and  
8 QoL. Results from this large, prospective, open-label study support the ability of Dysport 500 U to  
9 provide sustained efficacy in reducing motor symptoms coincident with significant improvements in  
10 pain and QoL among patients with CD, and provide the foundation for further investigation in  
11 randomised, controlled studies.  
12  
13  
14

### 15 16 17 **Acknowledgements**

18 This study was supported by Ipsen Pharma GmbH, Germany. Study design and concept were  
19 developed by the authors in collaboration with Ipsen Pharma; study conduct and data collection  
20 were supported by Ipsen Pharma. Data management and statistical analyses were performed by  
21 GKM Gesellschaft für Therapieforchung in Munich, Germany. Conduct of publication of the results  
22 of the study was developed by the authors. Editorial assistance for the preparation of this  
23 manuscript was provided by Ogilvy Healthworld Medical Education; funding for this was provided  
24 by Ipsen Pharma. The authors would like to thank Christiane Colling, PhD, Medical Project  
25 Manager, Ipsen Pharma, for her assistance in the conduct of the study and for review of the  
26 manuscript.  
27  
28  
29  
30  
31  
32

### 33 34 **Competing interests (this article)**

35 No competing interests. HH was the coordinating investigator of this study.  
36  
37

### 38 39 **Competing interests (previous 12 months)**

40 All authors are consultants for Ipsen.  
41  
42

### 43 44 **Funding**

45 The contents of this publication, especially the conclusions expressed, are those of the authors of  
46 the manuscript. As described in the acknowledgements, funding from Ipsen Pharma made the  
47 conduct of the study, the previous publication of primary outcomes, and this presentation of  
48 secondary outcomes possible.  
49  
50  
51

### 52 53 **Author contributions:**

54 All authors were involved in the concept and study design, study conduct, data collection, analysis  
55 and interpretation, manuscript writing, review and critique. All authors approved the final  
56 manuscript.  
57  
58  
59  
60

1  
2 **Figure 1:** Change in CDQ-24 total and subscale scores from baseline to Weeks 4 and 12 (ITT:  
3 total population).

4  
5 Total score and all subscores differed significantly from baseline to Week 4 and Week 12 ( $p < 0.001$   
6 at Week 4 and Week 12 vs. baseline).

7 ITT, intent-to-treat.

8 \*Change from baseline score was worse at Week 12 vs. Week 4.

9  
10  
11 **Figure 2:** Change in patient diary visual analogue score (VAS) from baseline to Weeks 4 and 12  
12 (ITT: total population).

13  
14 t-test analysis:  $p < 0.001$  at Week 4 and Week 12 vs. baseline.

15 ITT, intent-to-treat.

16 \*Change from baseline score was worse at Week 12 vs. Week 4.

17  
18  
19 **Figure 3:** Time course of change in total Tsui score and total CDQ24 score.

20  
21  
22 TSUI-Score: Week 4,  $n = 503$  patients; Week 12,  $n = 490$  patients.

23 CDQ-24: Week 4,  $n = 483$  patients; Week 12,  $n = 473$  patients.

24  
25  
26  
27 **Figure 4:** Correlation between change in CDQ-24 total score and change in total Tsui score from  
28 baseline to Week 4.

29  
30 Display of raw data; one dot may represent more than one patient.

31 Correlation coefficient: 0.26,  $p < 0.001$ ,  $n = 484$ .

32 (Week 12: Correlation coefficient: 0.24,  $p < 0.001$ ,  $n = 474$ ).

## References

1. Crowner BE. Cervical dystonia: disease profile and clinical management. *Phys Ther* 2007;**87**:1511-26.
2. Van Zandijcke M. Cervical dystonia (spasmodic torticollis). Some aspects of the natural history. *Acta Neurol Belg* 1995;**95**:210-5.
3. Velickovic M, Benabou R and Brin MF. Cervical dystonia pathophysiology and treatment options. *Drugs* 2001;**61**:1921-43.
4. Simpson DM, Blitzer A, Brashear A *et al*. Assessment: Botulinum neurotoxin for the treatment of movement disorders (an evidence-based review): report of the Therapeutics and Technology Assessment Subcommittee of the American Academy of Neurology. *Neurology* 2008;**70**:1699-706.
5. Poewe W, Deuschl G, Nebe A *et al*. What is the optimal dose of botulinum toxin A in the treatment of cervical dystonia? Results of a double blind, placebo controlled, dose ranging study using Dysport. German Dystonia Study Group. *J Neurol Neurosurg Psychiatry* 1998;**64**:13-7.
6. Wissel J, Kanovsky P, Ruzicka E *et al*. Efficacy and safety of a standardised 500 unit dose of Dysport (clostridium botulinum toxin type A haemagglutinin complex) in a heterogeneous cervical dystonia population: results of a prospective, multicentre, randomised, double-blind, placebo-controlled, parallel group study. *J Neurol* 2001;**248**:1073-8.
7. Truong D, Duane DD, Jankovic J *et al*. Efficacy and safety of botulinum type A toxin (Dysport) in cervical dystonia: results of the first US randomized, double-blind, placebo-controlled study. *Mov Disord* 2005;**20**:783-91.
8. Truong D, Lew MF and al. e. Long-term efficacy and safety of botulinum toxin type A (Dysport) in cervical dystonia. *Parkinsonism Relat Disord* Submitted;
9. Molho ES, Agarwal N, Regan K *et al*. Effect of cervical dystonia on employment: A retrospective analysis of the ability of treatment to restore premorbid employment status. *Mov Disord* 2009;**24**:1384-7.
10. Camfield LB-S, Y. Warner, T.T. Epidemiological Study of Dystonia in Europe Collaborative Group Impact of cervical dystonia on quality of life. *Mov Disord* 2002;**17**:838-41.
11. Ben-Shlomo Y, Camfield L and Warner T. What are the determinants of quality of life in people with cervical dystonia? *J Neurol Neurosurg Psychiatry* 2002;**72**:608-14.
12. Muller J, Kemmler G, Wissel J *et al*. The impact of blepharospasm and cervical dystonia on health-related quality of life and depression. *J Neurol* 2002;**249**:842-6.
13. Hefter H, Kupsch A, Müngersdorf M *et al*. A Botulinum Toxin A Treatment Algorithm for De Novo Management of Torticollis and Laterocollis. *BMJ Open* 2011;1:e000196. doi:10.1136/bmjopen-2011-000196
14. Tsui JK, Eisen A, Stoessl AJ *et al*. Double-blind study of botulinum toxin in spasmodic torticollis. *Lancet* 1986;**2**:245-7.
15. Muller J, Wissel J, Kemmler G *et al*. Craniocervical dystonia questionnaire (CDQ-24): development and validation of a disease-specific quality of life instrument. *J Neurol Neurosurg Psychiatry* 2004;**75**:749-53.
16. Rinnerthaler M, Mueller J, Weichbold V *et al*. Social stigmatization in patients with cranial and cervical dystonia. *Mov Disord* 2006;**21**:1636-40.

- 1  
2  
3  
4  
5  
6  
7  
8  
9  
10  
11  
12  
13  
14  
15  
16  
17  
18  
19  
20  
21  
22  
23  
24  
25  
26  
27  
28  
29  
30  
31  
32  
33  
34  
35  
36  
37  
38  
39  
40  
41  
42  
43  
44  
45  
46  
47  
48  
49  
50  
51  
52  
53  
54  
55  
56  
57  
58  
59  
60
17. Tassorelli C, Mancini F, Balloni L *et al*. Botulinum toxin and neuromotor rehabilitation: An integrated approach to idiopathic cervical dystonia. *Mov Disord* 2006;**21**:2240-3.

For peer review only



1  
2  
3  
4  
5  
6  
7  
8  
9  
10  
11  
12  
13  
14  
15  
16  
17  
18  
19  
20  
21  
22  
23  
24  
25  
26  
27  
28  
29  
30  
31  
32  
33  
34  
35  
36  
37  
38  
39  
40  
41  
42  
43

Stigma\*

Emotional wellbeing

Pain

Activities of daily living

Social/family life

Total score



■ Week 4  
■ Week 12







Supplement: bmjopen-2012-001853.draft_revisions.pdf [file bmjopen-2012-001853.draft_revisions.pdf]
